# Supplementary material for: Examining the effects of upward social mobility on women’s workplace experiences in China
Source: Front Psychol. 2025 Sep 19;16:1628896. doi: 10.3389/fpsyg.2025.1628896 (PMC12492638; doi:10.3389/fpsyg.2025.1628896)
Supplement: Supplementary file 1 [file Table_1.xlsx]

## Sheet:  Sheet1
The idea of external volume is very good, but there is a watch called "learning watch" that likes to start turning secretly when you are sleeping.
suggestions for fans 01 About loneliness How can there be loneliness? Isn’t it vast? We only have “one” loneliness that is huge and not easy to bear, and almost everyone has this dangerous moment, they are willing to exchange loneliness with any kind of vulgar and boring social interaction, and the false illusion of forced harmony with any incompatible person... But perhaps it is at these times t…
"Try your best to maintain it, even if it's just superficial. You have read a lot of truths but still have no money. You are swept away! ! In the grove of reinforced concrete and soil, why is the time to get off work always different from what the boss said? We are all busy making a living. We all bow our heads and pray. We are all bruised and battered. Our bosses are all superficial. The sound o…
Let others do their own thing, I'm just not lazy at work, relax, you don't have that many viewers [meow]
According to my observation, people around me who often compete with others complain about involution every day. I think involution is relative. If you find involution annoying, you are probably also competing with others. For example, you may complain that the admission to graduate school is too competitive. In fact, people who are not competitive don’t even force it. They are happily working af…
I didn't know what involution was before, and then my roommate saw my handicraft and asked, "Is involution so serious now?" I was confused, and then she explained it, but it wasn't explained clearly. But brother, I really just wanted to do it, and I had nothing to do at home, and it wasn't difficult, and the teacher asked for it. You were in a hurry to take a holiday and didn't read the requireme…
[Laughing and crying] My understanding of involution is that you have to compete with others for resources that are beneficial to you at work, and it is a vicious competition of life and death. Resources are not obtained through legitimate means, but through some behind-the-scenes operations to participate in resources that are beneficial to you. For example, you try to please a colleague you don…
Isn’t involution the brainwashing of your school/workplace: work/study till death, then study/study till death? Is it the kind of high-intensity, long-term work/study that makes you feel justified in harming your body and mind? The kind that overdraws your time and life. It makes you continue to overdraw your time and life to achieve their effect… In short, you push yourself too hard. Over time, …
Yes, I can’t find a job now so I’m just lying at home browsing Zhihu [Surprise]
Sometimes, don’t think Africans are lazy, because laziness is the reason why they don’t roll back. Humans have worked hard for many years to achieve the 8-hour workday, but in just a few years, they were forced to roll back to 996 and 007.
Reposted from Zhihu A student from Henger High School, a boarding student from an ordinary school, and a day student from an ordinary school agreed to meet after the college entrance examination. The boarding student arrived after the appointment time. "Excuse me, I'm going to the dormitory to pick up the things I brought from the last winter vacation." "What is a dormitory?" the day student aske…
Reposted from Zhihu A student from Henger High School, a boarding student from an ordinary school, and a day student from an ordinary school agreed to meet after the college entrance examination. The boarding student arrived after the appointment time. "Excuse me, I'm going to the dormitory to pick up the things I brought from the last winter vacation." "What is a dormitory?" the day student aske…
For ordinary people: only the college entrance examination can change their destiny. How many truths are covered up by this century-old lie. What's more terrible is that your parents and the society around you keep hinting to you that this is the true truth! Maybe you won't know until you graduate from college and enter the society that you are full of confidence in your job, but it is not what y…
remember one time I was caught being late, and the senior class leader told me: You will be fined if you are late for work in the future. I replied: I will probably quit my job if I go to work at 6am and get off work at 11pm. I have a good father who has his own unique insights into education. If I feel tired during my studies, I can just skip the evening classes, and my dad will help me cover up…
Hengzhong is right. Students should get up at 1 a.m., go to bed at 12 a.m., eat for 1 minute for each meal, no rest, study all the time, and do this every day. They will definitely get good grades. I don’t know if they can make it to the college entrance examination. Anyway, as long as the grades are good, they will get good grades. [eat melon][eat melon][eat melon] Ma is also right. Workers shou…
In fact, this work and rest mode is to help us adapt to the 996 work mode in the future [doge]
Once you get used to this kind of high-pressure education, you will feel how happy 996 is after graduation... [Speechless]
Internal competition! Goose, horse, duck. But if you change your mind, you can buy a house in a remote place with complete infrastructure, then learn a few skills or crafts, and then find a job there with a salary of 2,000 or 3,000 yuan and a lot of free time, and do what you like, so you can escape. If you want money and social status too much, then continue. [OK]
The Hengshui model is not only an educational problem, but more of a social problem. The involution of society has led to the belief among students’ parents and education practitioners that the college entrance examination is the only way out, and that only by doing better than others can one become a successful person. If students’ parents cannot understand the purpose of education, it may be un…
Some time ago, the teacher showed us a video of Hengshui. In one scene, students in Hengshui did not communicate with other students, but wrote down what they wanted to say in a notebook specially distributed by the teacher. The reason was that communicating with others would affect others' learning. In the video, a student said that he treated this notebook as his friend. I thought it was okay a…
Let the children erase their personal thoughts in advance and adapt to society [getting out of singleness doge] and work hard for the boss to live a happy life in the future
I graduated, but I found society unfamiliar. I had never been shopping, never been to Internet cafes, KTVs and other entertainment venues. Apart from the daily repetitive cycle of work, rest, and work, I found myself trapped in a prison without walls. Anxiety, depression, social phobia. I don't know, I can do nothing except study and work.
skr skr What is it that has turned education into a place of fame and fortune, turned schools into training grounds, and turned neighbors into a wall of honor? Parents are competing and quarreling, love has deteriorated and fermented into poison, saying "for your own good" one by one? Why do you treat me like a Christmas tree, hung with everyone's wishes? Students are like cows who work hard beca…
After reading it, I suddenly realized that it seemed that I had never thought about why I should receive education since I was a child. Now I am in the second year of high school, in a private school. This school also imitates the work and rest schedule of Hengzhong. The school leaders around me just say: "Ah, you must study hard and get into 985 and 211! You must study every moment and every min…
Primary school: It would be great if I could get into university. Junior high school: If I can get into high school, university life will be much easier. High school: Work hard, and you can have fun after you get into university. University: Work hard, and everything will be fine after you get into university. Work: Work hard, and things will be better when you get older. Old age: It would be gre…
graduated from high school in 2012. People who have experienced it say that the college entrance examination is really meaningless, as long as the grades are acceptable. I spent 3 years of my high school playing around, dating, playing games, learning programming, and learning to write plug-ins. In my senior year of high school, I was still skipping classes and hiding in the dormitory to watch Li…
This may cultivate excellent talents, but it will also harm the physical and mental health of some students. The original intention of education has been subtly changed. It is really harder for students to succeed each generation, and it is even harder to enter the society (I have a high school classmate who studied physics from a 211 university. After graduating from university, he went to work …
Hehe... Just a joke. The rate of depression among children is getting higher and higher. Parents say that children nowadays are so fragile. When they were young, they were blah blah blah... Then, everything is for your own good. I now feel that my job as a food deliveryman is easier than that of their elders. Although I am occasionally looked down upon, that is very rare. At least I think most pe…
As a college graduate, I want to tell you the truth. When I was in the third year of high school, I got up at 5 o'clock every day and went to bed at 10:30 at night. I persisted for a semester, and my health was basically much worse and it was the kind that could not be recovered. But you want to ask me if it was worth it? From the results, I was admitted to a non-key first-class university. Among…
What is involution: Watching a movie, in order to get a better view, one person stood up first to watch, and the people blocked by him had to stand up as well. In the end, everyone had to stand up to watch the movie, and only the people in the first row were sitting. Playing games, in order to have better entertainment, one person first charged money to beat others, and the people he abused had t…
Junior, Henan college entrance examination candidate, ordinary second-tier university. No holidays in high school, all homework. But I still think that China's college entrance examination is a way out for rural people and even young people! Don't believe that studying is useless. It's not that college and undergraduate graduates can't find jobs, they just think the jobs are too bad! And this is …
Young people should be allowed to sleep more. I think the sleep time should not be less than 9 hours a day. Young people should not be given too much work and pressure. They should be guaranteed to have time for some recreational activities. Our comrades should implement these measures and strive to achieve them where local authorities have not done so. -- Mao Zedong
But what's the use? Society is so realistic. If you don't have a particularly good education, it's not easy to find a job.... You know it's wrong. But if you don't do it, you will be eliminated. This is Chinese society.
When I was in school, I played basketball, football, and copied homework. It wasn't hard to find a job. [吃瓜]
I started from the starting line, studied hard for the college entrance exam, and worked hard. I finally made it to retirement and was able to see the beautiful world, but my health collapsed.
To be honest, I think it is 10,000 times more important for schools and parents to cultivate children's morality, emotional intelligence, values, patriotism, and sense of responsibility than to learn these things to brush scores! People nowadays are completely putting the cart before the horse. They don't know what is important and what is not. They think that a prestigious university that can be…
There are too few paths in China... From childhood to adulthood, studying and then working seems to have become the standard of life. This is why the education sector is becoming more and more distorted. There are too many people [smile]
really don't like the phrase "the strong prey on the weak, and the fittest survive." [Eye-splitting] I just want to go to a decent university, find a decent job, and live in a decent house. I can eat a different breakfast in the morning, and then go to work. After work, I can go home and play games, watch videos, and do housework after dinner. I can go out with friends on weekends and travel once…
am not good at studying. I remember the last time I chatted with a relative and asked him about his views on studying. "Studying is useless. It is all theoretical knowledge. It is useless to study for exams instead of for society. Students are trained to accept things as they are given. They think that finding a job is success, but those who do not know how to work for others often see their live…
I really think there is something wrong with society now. If you have to work for half your life, why spend decades just for a certificate? Just like taking the postgraduate entrance examination is to get a better chance in society, something that is meaningless to some people is forced to become meaningful. (Maybe my idea is wrong, I also need to supplement and modify it. I have a more serious d…
[doge] I don't know, I only know that if I had studied in a good university, I could have saved at least one year. Not the one year I spent looking for a job with a technical secondary school diploma. Of course, the final result was good. I fired my boss. I led a department to do custom cosplay props alone, but it was very troublesome during the period. But the only good thing is that I met my wi…
To be honest, there are some people who really become "high-scoring but low-ability" when they go to college. They don't even have interpersonal skills when they first enter college. They have no idea what to say or what not to say. Apart from the content of high school textbooks, they know nothing about anything else. There are many people around me who are finally excluded by most people. Study…
Young people between the ages of 14 and 25 need to study and work, but youth is a period of physical growth. If we do not pay attention to the physical growth of young people, it will be very dangerous. Young people need to study more than adults, and they need to learn many things that adults have already learned. However, their study and work burdens should not be too heavy. Especially for youn…
Junior high school teacher: No teacher will care about you in high school, you will be relaxed then. High school teacher: When you go to college, you will have holidays every day and can play freely. College: If you don’t study hard, you won’t even be able to find a job after graduation.
Children are human beings, not machines. Even if a machine keeps working, its spring will break. They also need to rest.
I have always liked what Mr. Pei said: "It is common to encounter problems at work. Is your first reaction to solve them by working overtime? Overtime is not a panacea for all diseases. On the contrary, it is a poison that only quenches thirst! Use it once and you will become dependent on it and get deeper and deeper into it; use it too much and you will lose all other skills besides 'overtime'. …
Regardless of the starting point, parents in ordinary families always hope that you will be a good child when you are young, a learning machine when you go to school, and a working machine after graduation. When you can't fit in the work group or even find a marriage partner because of your unhealthy personality, they start to hang you [doge]
Haha, work is harder after graduation. Do you think you can just get through it? It’s just the beginning.
My colleagues in the class were talking about tutoring their children. I told the girl next to me who had just graduated from college that she should let her child relax on the weekends. Tutoring is not good. I never give tutoring. She said, "So you are doing this job now [Great]" The first thing that came to my mind was, "Are you scolding yourself?" [Eating melon] I went back and told my mom. My…
Up is really a big talker. Society is competitive. If children don't suffer now, they will grow up "happy and healthy", but fail to get into a good university and work in a sweatshop in the future. Do you care? Society is competitive. If young people don't suffer, they will suffer in the future. Of course. Except for the second generation of the rich
Our education is faithless, our education is purposeful, and our life is mechanical. Right. It is for this reason that our country can rise in a short period of time. Education is verified, has made contributions, and cannot be overturned. People with high education do not necessarily have a good future, but they are definitely easier than those with low education. This is an indisputable fact. T…
As a student, you need to think about how to maximize efficiency. High-intensity work and overload operation will definitely reduce efficiency. How does your life differ from others? One minute of your work does not bring the benefits that one minute should bring. When you work hard and try your best to improve 10 points, how much benefit can these 10 points bring? One volunteer application may e…
think that going to college can indeed change one's fate, but most people nowadays have a miserable fate. Moreover, many people nowadays suffer the same as you. Even if you work as hard as a top student, you still cannot match the IQ of others. It is tiring to be able to go to college, but you still have to fight for a good university. Is it possible to get one? And the most important thing is th…
Now in school, they will be forced to compete at work in the future. The capitalists find that they don’t even need to actively exploit their employees, as their employees will start to exploit themselves.
Students who did well in the college entrance examination will only sigh that hard work pays off after entering college. They will enjoy a colorful college life in their first and second years, and naturally large companies will come to the school to recruit interns in their third and fourth years. Students who did not do well in the college entrance examination may have the same sigh in the earl…
Work 8 hours, play 8 hours, rest 8 hours, but this does not apply to students.
17 hours of school, so tiring, 12 hours of work, so relaxing [funny] This is the foreshadowing [eating melon seeds]
This kind of video is destined to disappear silently in the boundless world of the Internet. Although I have a job, I really think this education model is a failure, because I am a loser who came out of this education model [囧]
[Eye-sore] Everyone only sees the successful people of 996 and Hengshui model, so how many corpses are there behind the successful people? The 8-hour work system with two days off was supposed to be a matter of course, but now people are lucky to have two days off [laughing and crying]
Let me express my personal opinion: In fact, this model is really bad. The students are not like students, nor like human beings. They come out to do homework every day, then eat and sleep. They don't have time to think for themselves. It's a vicious cycle. After all, the number of people who can get into university is small. This model does not take the general public into consideration at all a…
Definition of holiday: Holiday means to stop working or studying on a specified date and spend the holiday. It comes from the "Seven-Character Music Couplets" by Zhang Jian, Jiaoran of the Tang Dynasty: "The soldiers return to see their wives, and the students sneak to the market on holiday." On December 8, 2022, the General Office of the State Council issued the "Notice of the General Office of …
The college entrance exam has become more difficult, students are in competition, teachers are also in competition, parents find that the schools teach the same thing, so in order to let their children learn more, they start to enroll their children in extracurricular tutoring classes. Tutoring classes require more money, so parents also start to compete at work, and over time, the whole society …
You said that if it is like this and the work is easy after school, it would be fine. But if the work is still 996 in the future, will there be any motivation to live? When I recall my school days, I was always in a hurry and had to go to and from work every day. It was really painful.
Everyone remember, life is the most important thing. My sister told me: In fact, any job can make money, it just depends on whether you can satisfy your current life.
hope that one day in the future every child will be engaged in a career that he or she likes, and before that they will receive high-level vocational training. In primary school, they will read and write. In junior high school, they will develop their nature and human emotions. In high school, they can learn about various industries. In college, they will learn professional knowledge in the indus…
don't understand why teachers now say: Now the purpose of going to college is to make a living. When I heard this, are we really just trying to survive? When I saw the teacher's words, I had a big question about learning. And my parents often told me that when I grow up, I would go to a good school and find a good job. And do we go to college just to find a good job? Is it just to make a living? …
Ideals are full and reality is skinny! The general environment is like this! Most of the people in my company's office work overtime for two or three hours without pay. Once I wanted to leave an hour early (8 o'clock in the evening), and my supervisor said to me with a "smile", "*** is leaving get off work so soon?" and then went to help her do some meaningless things! I have done all my work, bu…
Just like 996, in the past, when the 8-hour work system and studying were not too tiring, people could always do what they liked during their rest time, and had time to think and create endless possibilities. Now studying has become a burden, and working 996 has become numb. If I am not mistaken, many people don’t have any ideals or dreams anymore [laughing and crying]. Those who study just want …
Being tricked at school and being exploited at work
Considering that college graduates from second-tier universities today cannot find jobs, I wonder if in the near or distant future, even PhDs will be as numerous as today's graduate students. In order to select talents at that time, should we add postdoctoral degrees or above?
In primary school, the teacher told us: "As long as you get into a good junior high school, everything will be easy." In junior high school, the teacher told us: "As long as you get into a university, everything will be easy." In university, you need to take the postgraduate entrance examination, and after you graduate from the postgraduate entrance examination, you need to find a good job [eye-c…
I am almost done with college and have found a job. The salary is not high, but it is enough. Looking back, it is really ridiculous. I studied casually, passed the exam for a second-tier university, and found an ordinary job. Now think about it, what is the purpose of studying? Isn't it just for money and future comfort? But you have been suffering and tired for the past 20 years. Can you be sure…
As a physics teacher, I watched this video and combined my own views to talk about it. Don't misinterpret the meaning of the up master when watching this video. In today's society and this era, competition is indispensable and cannot be avoided. No matter what job you do, as long as you are not the first in the world, there will always be comparisons and competition. I believe that the up master …
Let me put it this way, my cousin graduated from a technical secondary school. Later, he went to a factory and learned the craft of making lathe molds. Now he has returned home and opened a small store. The three of us work on our own. We also have a small income of 20,000 yuan per month. We have dinner and drinks with friends at home, and we live a good life. Many of my former childhood friends …
Let me put it this way, even Hengzhong is not extreme. My elder sister is a Chinese teacher in Hengzhong (she jumped from No. 2 Middle School to Hengzhong). Homework is assigned during the holidays, and students correct and upload it every day (the kind where students post answers and correct them themselves), and the teacher is responsible for reviewing it. My elder sister never asks me to grade…
am a person from another province who is studying in Hebei. I don't really like the high school education in Hebei. The high school I experienced had the joy of roommates, we had physical education classes, New Year's Eve parties, we dared to doze off in front of the teacher, we dared to play poker in the dormitory at night, and we could even go to the cafeteria during the break to order a steame…
This is a collision of world view, outlook on life and values. It is too difficult to change. If the three views are not changed in essence, the current learning or working mode will not change. In an era where everything is about money, change must be made with a group of capable people who persist, and it will be useless if there are not enough people who persist.
But the reality is that we have no way to change the status quo. After watching the video, the only way to realize the value of life is to study hard, get into a good university, and find a good job.
I don’t know how strong the mental quality is for those who finally get into college and find a job [sly smile]
If you don't want to regret it when you grow up and start working, then grit your teeth and study hard.
The three years of high school were really difficult, but the pressure from society was much greater than studying. The college entrance examination allows us to meet more outstanding people, and change is subtle. The education model is based on national conditions, and we cannot change it. If you don’t work hard, others will. It was not until I started working that I realized that learning is re…
Same as the candidates from Hebei, the schools in Shijiazhuang and surrounding cities are basically like this, it feels like you are dying of exhaustion but you don't know if you can get into a good university. I used to go to school in Shijiazhuang as a day student, but my grades were not high (but I was very happy), so I went to Baoding, and now I go to school in a school that is accessible by …
What's the point of saying it? We must admit that the fate of most people is doomed from the beginning. People are selfish. Everyone doesn't like to work, but likes to play. If everyone rests, who will be the coolie? Artificial intelligence? Sorry, your life is much better than this. In order to maximize their own interests, the upper class can only let the majority of people work. In order to fa…
Poor students, and those class teachers and teachers. At the same time, I want to ask if the country can support all places and help them build a good university. When I lived in the city when I was a child, I couldn't see a university. Every day, they say that this industry lacks talents and that industry lacks talents. The things taught in the university are all good, but they are not practical…
heard that Hebei, as a province surrounding the capital, had good teachers at the beginning, but they were later transferred to support other provinces, so there are not many famous universities in Hebei. What we know now is that many parents transfer their children's household registration to Tianjin or the three northeastern provinces, and send the children themselves to Hengshui for education,…
discovered this problem a long time ago. I decided not to study after the high school entrance examination in the third year of junior high school this year. My teachers and parents "forced" me to study every day. We went to school at 6:30 and left school at 9:00 in the evening. We had no rest on Sundays and Saturdays. To be honest, I was really going to collapse. The huge pressure made my study …
When children are young, they are playing. Parents say: If you don’t study now, you will have no future. You will have plenty of time to play later. When children grow up, they will start working and have no time to play anymore…
The Buddhist students in Shanghai said it was hard to understand. Our best high schools all had 3:4:00 school hours, and the rest of the time was free to develop. I know it is easy for us to go to college, and I don’t want to take the path of getting into a good university and getting a good job. My grandparents have been on this path all their lives, and they have never found a life pursuit othe…
In fact, many jobs don't require so much hard work
It's normal. Hengshui should be the dream of thousands of parents to send their children to Tsinghua and Peking University. However, there are only so many universities, only a few hundred general universities, and only dozens of good key universities. If you have time to work hard like that, you might as well let it go and leave the time for real learning instead of alienated learning... Unfortu…
If you replace it with something else, it means you have to edit texts and fix bugs during the Chinese New Year, hold a video conference on New Year's Eve, start working at 5:50 a.m. after washing up, and work until 10 p.m. after lunch break. During this time, your boss will supervise you, and you don't get overtime pay. Let me ask you, who would agree with this?
When you are involuntarily admitted to a prestigious university and then start working, you will find that some people who are worse than you are more successful than you in their careers and lives [speechless]
Studying like Hengshui Middle School can certainly get you into a good university and find a good job... but how many of these students can live a healthy life until old age?
Primary school: It would be great if I could get into university. Junior high school: If I can get into high school, university life will be much easier. High school: Work hard, and you can have fun after you get into university. University: Work hard, and everything will be fine after you get into university. Work: Work hard, and things will be better when you get older. Old age: It would be gre…
Let alone the college entrance exam, even for us adults, the competition for job recruitment exams is very fierce. [笑泣][笑泣][笑泣]
I am so hopeless about the future. I can only get into a second-tier university, but I can't do anything with a second-tier university. Even a PhD student won't be able to find a job in the future.
According to the average monthly salary of university graduates and the admission score, the average monthly salary difference for each point is only 20-30 yuan. Based on 40 years of work, the value of each point is about 10,000-15,000 yuan. How many points can you improve by paying so much more? How much is your physical and mental health worth? What's more, will doing questions all day and lack…
I wondered, if the students were working so hard, wouldn't the teachers be even more exhausted? Everyone cares about the students, but no one cares about the overworked teachers.
Some parents think that adults who don't study should endure more hardships and attend classes. I don't understand this. You are all employed. If your boss forces you to work overtime, would you be happy? If he doesn't give you a holiday during the Chinese New Year and asks you to get up at 5 a.m. to go to work, you must be so angry that you want to file a lawsuit [smile] If you don't experience …
suddenly thought some time ago that the things that people spend the most time on in their lives are the most meaningless and forced. Since childhood, I have been forced to study, then take the junior high school entrance examination, the college entrance examination, and after graduation, I was forced to work, and by the way, I was forced to get married. If you like someone, it's okay, but if yo…
996 is a work model that you have to compromise in order to survive, but even if you have to choose 996, it does not prove that it is right. I have to compromise for life. I can accept that my salary is lower than others, but the boss will choose those who can accept 996. In order to survive, you can only endure the compromise. [Sad]
Anyway, I'm not very smart, and I went to school in Hebei. It's no use trying. No matter how hard you try, there will be people who work harder than you, and then they'll trample you to the ground. I've given up. I'm going to work abroad in the future and try not to come back [laughing and crying]
am a person who did not even go to high school, although I could have gone and my grades were just good enough to get in, but I did not go because I was too lazy. I did not ask about the registration time, and thus missed it. Now, I am learning a craft, learning to be a chef, a profession with not very good prospects. However, my hometown is very backward, a very backward rural area. All weddings…
have to say that teachers are really too tired. Our grade leader, who was a very good person, died in office due to excessive workload. He was only 42 years old... My child is going to junior high school this year... [crying][crying][crying]
Got it, workers working from home during the winter break, their hands have to be exposed, and the camera can only be turned off at noon [doge]
It's so real. My friend had a mental breakdown on the spot because he didn't do well in a test (he burst into tears and tore up the paper). Later, he was diagnosed with depression and anxiety. I feel that everyone is overly pursuing grades and ignoring many other things, including health and interests. It seems that everything will be fine if they pass the 985211 exam. They may never consider whe…
In fact, to put it simply, it means going to a better school, finding a better job, and living a better life.
In the first week of my senior year, I was lucky enough to understand the direction I wanted to go in the future. I resolutely gave up the path that I had planned for myself after 14 years of hard study. After a 4-hour heated argument with my family, I got their approval. My father said to me, "This is your own choice, so don't leave any regrets." When I studied Marxism in college, I understood w…
Junior high school students in Shenzhen, each class has a quota for the evening self-study in the third year of junior high school. According to the grades, our class could only have more than 30 people staying, but with the performance of the seventh and eighth graders in our class, we successfully won more than 40 places. The daily class teacher is also very good. He chats with us during meals,…
really don't know what's the point of working so hard for the college entrance examination? Anyway, you may not find a good job after graduating from university, and you have to start from the grassroots. Those who don't work so hard can cultivate some interests while studying, such as cooking, painting, model assembly, electronic model assembly, etc. Although the starting point is not as high as…
Studying is important, but that doesn't mean you shouldn't work hard. I just hope everyone can understand that some things are unnecessary and you could have lived a better life. Let's think about it and replace studying with work. How can you live well without working hard? However, just because you work hard doesn't mean you should thank your boss, and it doesn't mean you should like your boss,…
I feel like I don’t really have to go down this path now. My cousin graduated from a vocational high school, majoring in logistics, and has been working for two years and earns 7,000 a month. My classmate graduated from a mechanical engineering major and works, and earns about 78,000 a month. I think if I work hard, I can get by…
The teacher is indeed serious and responsible. After all, which teacher wants to work so early every day during the winter vacation and hold class meetings in the middle of the night? It is the school's requirement. As a worker, I am just taking the blame for the school [spicy eyes][spicy eyes]
It's nice to have a vacation after work
Our school is OK. The only class in the first year of high school that imitates the Hengshui model is our class - Class 47. When I first entered high school, I went to Wuhan Mental Health Middle School for a checkup for depression and autism about one or two months later. Of course, you can't see anything in my video, because there is nothing to express in my video. I get up at 5:30 in the mornin…
Before college... "You are studying now, you can have fun after you pass the college entrance exam." After college... "Your task now is to study, and find a job that earns money after graduation." [Speechless][Speechless][Speechless]
I once read a novel about a business tycoon, which said that school study is important, it can help you get a good job and have a source of income after entering society. However, if you only rely on your job and pin your entire life on it, your life will not get better and better, and your assets will not continue to increase, but your liabilities will increase. You work hard for money, but in t…
You have to run, but not run to death. I am very fortunate to have met a good teacher who will discuss homework with us. But my classmates are much more tired than me, and I am scared when I look at the tutoring schedule. My parents never force me to study, and because of this, my grades are pretty good. A classmate who did better than me also said in a previous chat that he was in a bad mental s…
You are all criticizing the school and the education model. Don’t you think you are criticizing the wrong people? ? ? We gave you a happy childhood, but you are applying for a job with your junior high school diploma? ? ? It’s not the fault of the education model, nor the teacher’s fault, but the Guo family that is distorted.
As a junior high school student in Hebei, I have good grades. The teacher will give extra questions to students with good grades in the class. Before the epidemic, we had half a day on weekends to do these questions. Everyone asked the school teacher for extra tutoring, especially during the winter and summer vacations. One hundred yuan per hour, and the class lasted until the 29th. Now that scho…
Is it really a problem of middle school or university? Is it really a problem of the education system? I don't think so. First of all, the low level of industry and the small number of high-quality jobs have led to a small number of jobs being competed for by the majority. If you don't become the top part, it will be extremely difficult to monetize your education. For example, students from 985 a…
Give me a chance, I want to go to Hengshui, I just want to have a stable job in society.
A student from Hengshui has graduated and moved to Beijing. I have been working for two or three years. When I chatted with my colleagues in the company and talked about our schooling experiences and childhood, I realized that for students educated in Hengshui schools, graduation is a terrible and cruel thing. I get up at 5 o'clock and go to bed at 11 o'clock. After I finished talking about schoo…
It is better to have a good major than to have a good test score. See through it. There is no need to stick to 985211. Even if you get in, you will find that your job may not be as stable as that of a nursing major.
Well, you will understand when you start working, a good school still has many advantages, [laughing and crying] now I have graduated for 6 years and I am almost 30, I really regret not studying hard when I was a student, well, if I persisted for 3 years and got into a good school and a good major, I would have a different starting point in the future, don't wait until after graduation to regret …
Can anyone tell me how awesome the students from Hengshui are after they start working?
There are hundreds of kinds of people. Some people are smart since childhood and have high study efficiency. Some people are stupid like me, who are average in study, but have a coal mine and can only work hard to participate in the internal circulation game. However, they find that they are not as talented as others, and they are not as hardworking as others. At the age of 30, they still can't f…
Locals abroad have high welfare, but you, a migrant worker, can’t even get a green card, can’t find a suitable job, and you are unfamiliar with the place, so you are worse off than working 996 in China.
have given the most extreme example. Do you think that a security guard who did not graduate from a technical secondary school can get out through a regular language school? Then what level of skills would be considered to have a lower success rate than them? This is still under the premise that Japan has strict restrictions on Fujian household registration (because the Fujianese are the most lik…
What's disgusting about it? I come from a working-class family. When I was young, I didn't have any tutoring or go to a key primary school. I relied on myself to get into a key high school and a good university. After graduating from university, I applied for a semi-self-funded postgraduate program. I didn't find an agent or anything like that. I learned to write application emails online by myse…
<p>There is also "After working for 3 years, my wife and I paid half of the down payment, and each parent paid the other half." Do you think everyone in this society has parents who can "help pay the other half"? </p>
The generation of Europeans who built subways, railways, bridges and highways in 1820 also worked hard. We are just at a different stage. However, the Renaissance taught Europeans to balance work and life. We lack a little humanistic care.
Luca just missed home. Unemployment in Italy is very serious. After graduating, college students are either unemployed or go to work in France or Germany. In another account of a Chinese expatriate in Paris, a financial worker with an Italian university degree who has worked in Paris for six or seven years often works overtime and earns less than 2,000 euros (1,700-1,800). When asked why she didn…
It is like this in small places. A few big families have some big businesses (jobs), and the rest are in the system (think of it as a big company). There are no better opportunities. <br>If the family is not in the upper circle and has no connections and is not in the system, if the children are still hanging around in the local area, they will be second-class citizens. <br>An important reason fo…
In fact, Italians don’t usually have so much utilitarian study and work, and they pursue a balance between life and work. One reason for the internal circulation in China is that it is too utilitarian, but in the final analysis, Italy’s social welfare is still good.
I used to work for an Italian foreign company. Because the company was small, I also knew the owner, who was also our CEO. At the beginning, I really couldn't adapt to the Italian work style. It was extremely frustrating. The management was vague. In my opinion, I had to kill one person to warn the rest, so I got by with the vagueness. If that guy hadn't been an asshole and was arrested for sever…
used to work for an Italian supplier who often disappeared for three to six months [covering face]. I couldn’t find him through emails, text messages, or phone calls [covering face]. He often delayed the delivery. Once I complained to my senior, and she said she knew the Italian supplier. When she couldn’t find him, she would just contact his mother and gave me his mother’s email address. <br><br…
Involution has little to do with trade unions and labor laws, but is closely related to the high ground of the industrial chain. Otherwise, the whole world can immediately increase employees' wages through legislation and supervision. The average wage in the United States is 4,000 to 5,000 US dollars. China has legislated a minimum wage of 10,000 US dollars, which immediately surpassed the United…
Huh? Work-life balance? Isn't that a capitalist lie?
The Labor Day holiday is three days off, and the holidays on the two weeks above and below are cancelled. Labor Day is right in the middle of the weekend, which is equivalent to not having any rest and working continuously. You must keep your phone open during the holiday and not delay work, otherwise your boss will deduct your bonus
Don’t answer any work calls or work emails… This one almost broke my heart [crying] Don’t say I’m on standby 24/7, even if I’m retired in China, I can’t do that.
Life is for work or work is for life. Due to the national conditions and historical logic, it is completely opposite and there is no comparison.
Anyway, I am not a person who likes to study. As long as I can lie down, I don’t care how others study. Even if I am the last in the grade, as long as I can graduate, I will lose if I do one question. Others study, let them study, I don’t want to go to Beijing, Shanghai or Guangzhou to be a superior person, I just want to go back to a small fourth-tier city and work from nine to five. Others hand…
The main reason is that some people are easily influenced by others. When others study, they feel anxious and think that they are not working hard enough. If others don’t study, they will not study either. I am the kind of person who is more self-willed. It doesn’t matter to me whether others want to study or play. Others study all day long, and I go play by myself. Others can’t graduate even if …
I have very similar ideas to you. I just want to graduate early and find a job with less overtime, play games after work, pay attention to computer hardware, and occasionally pick up some second-hand accessories to play with. I just hope I don't fail any courses in college [covering my face]
Wrong, living a relaxed life only after reaching the economic conditions is not called free and easy. Living a life according to the economic conditions and not caring about other people's eyes is called free and easy. If I don't have a house, I will still go to a fourth-tier or fifth-tier city, find an 8-hour job without overtime, and then save money for four or five years to spend hundreds of t…
asked my roommates who are super-hardcore the other day. They were discussing how tiring work is. I asked them if work is all there is to life after graduation. They were silent, and then said it seemed like work was all there is. I thought, oh, this is where we are different. After graduation, I still want to raise cats, paint, go ice skating, travel, carve rubber stamps, watch movies, edit, pla…
Yes, many people think that life is for work and making money. I am just the opposite. I think work and making money is to maintain life and hobbies. It would be putting the cart before the horse for me to abandon my life for work.
I thought the same thing when I just graduated 12 years ago. I went back to my hometown after graduation and found a relatively easy job. I didn't expect that I would come to Beijing to struggle in my middle age. It's better to learn more while you are young, because you never know what will happen in the future or where you will go. Life is really long.
<p>My high school and college life was like this. My high school teacher once asked us to "voluntarily" order exercise books, but I refused. After a lot of persuasion, the teacher finally paid for me to order them, but I still refused. I became freer in college. I didn't get along well with my roommates, but I had a good relationship with the roommates next door. When I had no one to accompany me…
What a coincidence. There is no need to give up life for work. Life is the most important thing.
planned to do the same. I would slack off in class and review for the final exam. As long as I didn't fail the exam, I would do whatever the teacher asked me to do. I would never do more than one question. When I returned to the dormitory at night, I would not care about studying and would just play. I passed the CET-4 and CET-6 and participated in some practical activities of the clubs. I never …
There was no need for luck at that time. If you went to a technical secondary school or vocational school, you were guaranteed a job. The company allocated housing, and your children went to the company's kindergarten or elementary school. Don't talk about 996. If you got off work on time and didn't leave early, you were considered diligent. Three people did the work of one person, and you wouldn…
am the same. I graduated successfully and went home to take the civil service exam. I am ready to go to work and work six and a half hours a day. I think that my life is comfortable and happy.
I am the same as you. I don't care about GPA or weighting. To be honest, I don't care too much about whether I can graduate or not. I am trying more possibilities. At worst, I can find a job with a monthly salary of 4,500 yuan in the future. If I don't have children, I can still live a good life, right?
You are absolutely right. I have the same idea as you. I am studying in Shanghai now. I will go home to find a job as soon as I graduate. The high housing prices in Shanghai do not welcome me at all. Why should I join in the fun? Instead of working hard all my life to earn a 100-square-meter house, I might as well go home and live a mediocre but happy life.
I have found a comrade. When I used to follow others, I was thinking about first-tier cities, annual salaries of one million, and chatting and laughing with bigwigs. Later, I came to my senses and realized that I am not cut out for that. I decided to go back to my hometown, find a job that can support myself and give me time to rest, and pick up the hobbies that I lost when I followed others. It'…
Plus one, I have given up on gambling. I will work in any job I can find and live according to how much money I earn. Let people gamble if they want to, and let them say I am a loser. The most important thing for me is to live happily and just get by. I don't want to think too much anymore. As the saying goes, if you don't plan for the future, you will have immediate worries. Even if we have plan…
It's rare to meet like-minded people. I also want to graduate and return to my hometown in a small city to live an ordinary life. I will do my best in study. I will slack off when I don't have classes. Some people also tease me for being lazy and not studying. My understanding is that people like us have already seen things lightly. We accept the fact that we are mediocre and incompetent. Why sho…
am just like you. I live in the same dormitory with the top student in my major. I can't compare with others. Seeing how tired they are makes me even less willing to work hard. I have hardly participated in any activities, and never received any scholarships. My grades are average or below average, and have nothing to do with any awards. When I don't have classes, I stay in the dormitory and read…
Comrade, I am the same [laughing with tears], my high school grades were OK, I got into a 985 university, I used to like playing games and watching anime, but when I saw that everyone else was studying in my freshman year, I got very nervous, and ended up not playing well, nor studying well, I failed 5 courses in my freshman year, and I didn’t finish them all until my junior year, but later I fig…
Right, right, right, as long as the grades are good enough, I don't care what others think. My own comfort is the most important thing. I will find a job in a small town, live my life leisurely, get off work for eight hours and then leave work. This way, I can still buy groceries and watch the sunset on the way home from get off work.
[Agree] I can relate to this. In fact, what you said is exactly my current life situation. Work is for life. Life cannot be just about work.
<p>emm... This should be the dream of many people, until I was beaten and found that I had to work very hard to live a life like yours... If you want to earn a decent income from working from 9 to 5 when you return to your hometown in the fourth-tier cities, you have to take the civil service exam first. I looked at the scores and graduate schools of the civil service interviews in my hometown in…
There is no point in scolding, because the salted fish are not unconscious, but too awake. The salted fish have seen through the essence of life, know that work is not everything in life, and know that even if you work 996 in Beijing, Shanghai and Guangzhou, you can't afford a house in a big city. You said that you are scrambling for guaranteed admission to graduate school. How many guaranteed ad…
I second that work is an addition to life.
But how can you have money without working?
I can't find a job in a small city like 18th tier.
If you go to any small fourth-tier or fifth-tier city in the north and wander around, you will find that it is too easy to live comfortably in such a place. The housing prices of new houses look frighteningly high, but in fact, there has long been a surplus of supply. A second-hand small-sized house in an old community is no more expensive than a Passat. Although the salary is low, the requiremen…
Hahahaha, there are indeed many big guys among my university classmates. They study well and participate in various competitions and activities. They are really amazing. But I don’t have any lofty ideals. My biggest goal is to live comfortably and happily. It’s all done after I get my diploma. After graduation, I will find a job in my hometown step by step. I have bought a car and a house for my …
I agree that work is for a better life, meaningful and colorful life
I agree that work is for a better life, meaningful and colorful life
I am the same. Yesterday, I was playing with my phone while charging it, and one of my roommates who was preparing for the postgraduate entrance exam asked me, "Aren't you nervous or worried? You're about to graduate. I see you playing like this every day [dazed] I couldn't help but retort, and I said, "I'm not a nervous person. I'll find a job locally after graduation..." To be honest, I don't l…
Plus one, and my school is a second-tier university. Although there are always some people who struggle more than the answerer, most people study normally. I thought that if you are a second-tier university, how can you get better than others in 985? So I just pass the exam and go back to my hometown to find a stable job. The most weird people who answer loudly in class are really crazy. They hav…
Medicine, law, police, firefighting, emergency, military and other professions are "dedicated jobs". Those who don't want to be introverted generally won't touch these professions [Thinking]
I have explained it countless times. If you don't want to read it, I will explain it to you again: the second-hand house price in the fourth-tier cities is only 4,000 to 5,000, and there is no need to draw lots for cars. You graduated from college and came here with nothing. Find a job with a monthly salary of 3,500, don't spend money recklessly, and if you can't afford these two things within 10…
was confused and depressed about work after graduating last year, but later I read some books and watched some movies. Suddenly I became enlightened. I found a decent job and quit before the New Year. After the epidemic, I went to a city I liked for a long time and worked as a waiter in a restaurant. My family scolded me to death, but I don’t care. Now I am happy every day without worries. I plan…
<p>Not? My wireless small city is all over the place. This year I worked so hard to be able to go home and work</p><a class="comment_sticker" href="https://pic4.zhimg.com/v2-b789d8e597d920061dcd4efb585cd343.gif" data-width="" data-height="">[Thinking]</a>
I am very similar to you. I also have many things I like. I will continue to do the things I like after I start working. My current efforts (not the kind of hard work, but just taking it seriously) can be said to allow myself to make the things I like become my work in the future.
Ah, this, this, this, it's not me who's working hard. It's because my husband was transferred to Beijing for work, and I also quit my job and came to Beijing (I feel that five years ago, whether it was around me or in society, the divorce rate was still quite high, so I was forced to break my iron rice bowl, I only have a bachelor's degree), I really feel the gap in academic qualifications, so I …
The point is that in fourth-tier cities, these two things only cost about 250,000 yuan to equip, which is affordable for most families. Even if you are alone, you can definitely have them within 5 years of normal work. Not to mention how big the house is or how good the car is, a second-hand old house of 50-60 square meters and a domestic car are definitely no problem.
Damn, I am too influenced by others. Besides, my family lives in a first-tier city. If I don’t get into a 211985 university, there is no good job. I work so hard just to get admitted to graduate school [covering my face]
also attend classes on time, but I only study hard at the end of the semester because I am afraid of failing. Failing a course is very troublesome and you have to take a make-up exam. It is easier to pass it in one go. I read novels, draw pictures or play games when I have free time. After graduation, I will go back to my hometown and find an easy job. How great is that? You guys can do whatever …
If you have a good GPA, you can go to a good school to teach smart students...If you work at a good school, you can give your children a good degree...
How can I find a nine-to-five job? Please help.
I am the same [agree][agree][agree] Although I am still in the third year of high school, the life I long for is such a free and happy one, not bound by heavy work, and having enough money to spend. The most important thing in life is to be happy [yeah][yeah][yeah]
You are definitely not the only one who thinks this way. Naturally, many people would want to work in a lucrative job in a fourth-tier city without overtime. Do you have any advantages over others? Or do you have connections at home?
Few people want to stay in fourth-tier cities. There is a net outflow of population and it is difficult to recruit people. Many companies no longer have academic qualifications. In the past, full-time college graduates or above were required, but now even technical secondary schools can find office jobs. I interviewed with four companies and passed all of them. I chose one that is close to home a…
Many people do not have no way out, but their vision is too high. They are unwilling to return to the fourth- and fifth-tier cities, small towns, or rural hometowns. Who does not have a hometown for their parents? Are you afraid of not being able to find a job in a small place with a college diploma? It is nothing more than that they feel that they can earn less, have less fun, and have no fun in…
Hahahaha I really appreciate your mentality. Anyway, I don't want to squeeze my head to be a superior person. I think that living a happy and comfortable life and being healthy are the most important. It doesn't matter to me what others do. Everyone has their own wonderful life. I just want to have a stable job in the future, settle down in a second- or third-tier city to be closer to my family, …
Really, really! ! I saw an article yesterday, which roughly said that because the work is too tepid, it will be like boiling a frog in warm water. After a few years, you will lose motivation and ability, so you have to study hard to work. I think it's funny, is your life only about work? Isn't a stable job good? In your free time, you can learn painting, music, dancing, singing, petting cats and …
I am now in my third year of high school and I really want to focus more on my life in the future, but I am always afraid that when something happens to my family and they need money, I won’t have it, so I really want to make more money [covering my face]
What are you thinking? Your 9-to-5 job has already been taken away by someone else.
A small, old, dilapidated apartment in a fourth-tier city is only as expensive as a Passat. If you want, you can buy one after working for a few years. My house and car combined are not as expensive as an Audi A6.
Same as above, I particularly dislike those hardworking colleagues. Is life just about work? They scheme against each other all day and look down on us locals, saying that we are not doing our jobs properly. Is it wrong to do something you like after work? Once I was so angry that I directly cursed, "Who told your parents not to work hard?"
Note that involution ≠ progress. Involution is completely unable to generate positive returns. What you call hard work and getting rich through hard work is not involution. You work in a first-tier city, and in order to please your boss, you work overtime until 11 o'clock every day without pay, which makes your boss think that other people who get off work on time are not working hard. In order n…
will answer you again. <br>When I saw your answer, I suddenly remembered that there was also a highly praised answer on Zhihu, which is very similar to what you said. I will repeat it for you, haha. (It's probably like this, I can't remember it clearly, but I can tell the meaning) <br>Question: If you have 100 million, will you still study? <br>Answer: Yes, with this 100 million, I will learn pho…
Hahaha, I agree. Do what you like after get off work, but my crappy 18th-tier job hasn't found a job that lets you get off work on time.
<p>As someone who has been through this, I can tell you that most of the activities in school are not worth reflecting on your resume. </p><p>Graduate degree is all about GPA. </p><p>If you are looking for a job: what is really useful is the school, GPA (not so important) and professional ability and work (very important). </p>
That's it. It's impossible not to participate. Unless you don't want to study for a master's degree and your family can arrange an ideal job for you, otherwise it's impossible. Not to mention other things, some time ago, a marathon volunteer gathered at 3 a.m. and ended at 3 p.m. There were 3,000 people in the whole school who signed up.
<p>You're welcome. I'm just a college graduate. When I took various exams for jobs that require a college degree or above, I found that most (not all) college graduates' learning and comprehension abilities are indeed not as good as undergraduates'. However, this also determines that it is difficult to have a sense of spiritual connection when chatting with them. If I work in such an environment …
<p>Blood donation plus Sutuo, it's really exaggerated. To be honest, these are not considered when looking for a job or taking the postgraduate entrance examination. GPA, projects, certificates, and works are all real, and finally the interview performance is considered. Other things are just clouds</p>
So what jobs do they do after graduation?
That's about it. I've said before that I work so hard just to study for a master's degree, and accumulating a solid professional level will also be beneficial to my future work. The application is just an inevitable way to achieve this goal. Although I don't like such high-intensity competition, I know that these things are inevitable and cannot be rejected.
Maybe you can change your major. I studied English + International Business (double degree) at Huazhong University of Science and Technology. As a liberal arts student, I had to learn all kinds of engineering math and computers. I studied for two years and I really didn’t like this major. I had no motivation every day. It was even more difficult to see others working hard and getting good grades.…
Balance time, efficiency and mentality, otherwise how many years can you keep doing this? The working environment will be more competitive in the future, what should I do then? I have been working for a few years and have a little experience: the greater the proportion of a task that I can control (such as progress, direction, etc.), the easier it will be to do and the better the quality will be,…
Everyone has their own goals, whether it is to take the postgraduate entrance examination, to be admitted to graduate school, or to work. The struggle and rest stages of these three are all different. If your future choices do not require GPA and competitions, you can accumulate more practical experience or go out to play and gain more knowledge. It is really stupid to be like them. Society is no…
<p>I think that all the hard work is just to make the resume look better, but these extra points are not emphasized in the actual recruitment. Of course, it is best to have them. The main focus is on professional ability, work experience, and personal work attitude. Many great people are not so hardworking at ordinary times, but treat it as a kind of fun. For example, modeling, they just treat it…
Everyone knows that big cities are good, but can you really stay there? How many people can really stay after working overtime? Most of them can't save a penny, work for the capitalists for nothing, and finally return to their hometowns in disgrace? Some even suffer from a lot of problems due to bad living habits... Many people are rushing hard now, but they don't even look down to see what road …
This kind of working environment is pretty good, it's not considered involution at all. For example, if others like to work overtime, you can live your life as you want, such as coming to work early in the morning, leaving get off work late at night, contacting clients on Saturdays, or studying technology. If you don't like to work overtime, and you feel uncomfortable when you see others working …
There is nothing wrong with people, but the environment. If everyone knows clearly that they can get a job after graduation, or they can get a job even if they don't graduate, will they still be competitive? No. Why can't even undergraduates find jobs now?
If everyone knows that they will have a job after graduation, or even before graduation, how many people will not study and make progress? Then why bother to go to college? Why bother to study? It would be better to just go back. There are too many people and too few jobs. If you don't move forward, you will be beaten. This is the general trend.
How do scabs at work cause internal competition? They do more work than others in order to get more praise or more salary. It is understandable that they do it for their own good, but gradually everyone does this, and it is impossible to increase the salary of everyone, so they upgrade the level of competition again, and it becomes like this [cool]
What I mean is that involution is forced diligence beyond the normal level, when the whole society works 007, forced to work 365 days a year, you can also say that you work voluntarily, you don’t want to work and lie down and let others laugh at you, you want to be lazy but also want to get paid, and finally attribute it to involution? That’s what I mean.
I really don't understand. The mainstream circle around me is full of science PhD students who received scholarships all the way up, including myself, but no one thinks there is anything wrong with working after graduating from undergraduate school. There is a girl who earns 3k a month and is happy every day. She is my best friend. I really envy her and feel very happy. There are also those who e…
think that university is different from working. In the end, the knowledge you gain from studying is yours, but in the end, the results of your work belong to your boss’s company.
To put it bluntly, they still have no self, no goals of their own, and they have to look at others for everything. I have a classmate who was doing his own things while others were studying. He dropped out of school in his junior year to start a business, and came back two years later to continue his studies. Another classmate spent four years in college playing photography, and opened his own st…
think the biggest misunderstanding of undergraduates is that they are guaranteed to study in graduate school. If you follow the wrong supervisor, it is better to go abroad... However, graduate education is indeed more and more necessary for work. But some supervisors in China are really not commendable.
Please keep studying for a master's degree and a doctorate, and don't go out to work! ! I want to live two more years! Please, have mercy on me!
suddenly felt a little envious, but more of it was anxiety. To some extent, I can barely be considered a person who is "successful" with others, but what makes me "successful" is the information I see through social media (such as your answer at this moment, hahahaha). I am from a second-tier university and there is no policy of guaranteed admission to graduate school. As soon as I entered freshm…
No, no [crying] My grades are very average, I am not a student of any top-notch university. I wanted to be admitted to graduate school but now I am afraid that I can’t do that with my GPA. I don’t want to continue studying (working hard) anymore. Now I am even considering whether to find a job after my undergraduate degree…<br>I am just an ordinary person. My dream now is to live a good life and …
In this way, the problem is not with active people, nor with leisurely people. A few points are summarized: ① The society is developing rapidly, people's material life is improving, and their life needs and desires are increasing. The rules of social competition are also gradually improving (in the past, people of our parents' generation had secondary school and college education, which was quite…
[Awkward] But is volunteering useful for finding a job?
used to have this habit of seeking everything when I was in college, but now I think it’s really unnecessary. <br>Fellow students, there are many resources, opportunities and choices in school, but people’s energy is limited. You must think clearly about what you want most! <br>Then use this as a goal and make plans to see which things you should go all out for, which things you should strive for…
don't know what kind of mood the author was in when he wrote this answer. Although I don't quite agree with some of the views in it, I also agree with the author's answer. After reading it, I just feel that the involution described by the author is his original intention and even has the suspicion of blindly following the trend. The quality of class is not entirely determined by the details of th…
Whether you want to study or not, follow your heart. Be clear about what you want in the future → what you need to achieve first to achieve this goal (enrollment, postgraduate entrance examination, qualification certificate, etc.) → then plan this small goal (take the exam to get admission, study hard for the postgraduate entrance examination, show your ability to find a job, and live comfortably…
<p>I feel that student life does not count at all, after all, it is laying the foundation for future work</p>
You can study inward, that is for yourself,<br>You can work lazily, that is to avoid being exploited by capitalists
just need to pass the exam. The thing I hate most about my computer major is computers! I feel sick just thinking about it! I am not interested in this at all! I can't even write the most basic program code after studying so far. No matter how hard I try, I can't understand it. So I gave up. I failed the course and it is impossible for me to be admitted to graduate school. Therefore, I put all my…
There are so many weird job hunting situations nowadays. I had an interview a few days ago, for a private company with more than 200 employees, applying for a surveyor. There was a vice president there, and he asked me if I could read construction drawings (CAD). I said I had never been exposed to it, but I could draw (I learned this in college). Then the vice president said, "You just want to le…
had a job interview today. The location is Shanghai. I'm 27. Are you married? Do you plan to have kids? Yes, housing is provided. Housing is provided for the first month of trial work. You need to pay a deposit of 400, which is not refundable if you don't work for a full month. After you are assigned a position, you will need to find a place to live by yourself. You passed the interview. You will…
UP, you haven't worked in a small company before, right? Small companies are always like this, they want to be a team of one person. Also, the reason they mentioned the layoffs in big companies is not to question your ability, but to imply: there are many people like you who are looking for jobs, if you don't do it, there are plenty of people who will do it, so don't be too demanding, just make d…
work in a small company, and it seems that many people don't realize the seriousness of the problem. I am a little panicked now, and I am very tired now. After the big companies lay off employees, the laid-off people will go to the next level to find a job, and similarly, this level will also have a group of people laid off. And so on. In the future, it will only become more and more competitive.…
B station saw that I am also looking for a job [smile]
I totally agree. I have interviewed a lot recently. Some are outsourcing or large companies that require 996 and a six-month probation period. I have worked in a small company before and suffered a loss. I don’t want to go again. Now I am stuck. Small companies are not good. Big companies are starting to be competitive. It seems that normal jobs don’t exist at all.
Up, I still lack social experience. In an industry, if the upstream large factories lay off employees and shrink, then the downstream small factories will definitely be hit harder. It is obvious that those who are laid off think that small factories are good. Even if large factories are in a mess, they still have a stable source of projects and can maintain various costs. Small factories really h…
Let me tell you my feelings. I have worked in big and small companies for 5 years. I agree with what the above said. Then I thought it through. In the fourth year, I quit the job in the big company and went to a small company. The income is not high. I study for the postgraduate entrance examination while working. Now I am in the first year of postgraduate... I am thinking about joining a state-o…
I'm a student of mechanical engineering. I finally passed the interview of a central enterprise during the Chinese New Year. Now I've been working in a workshop for a month, working two shifts. The benefits are really good. Although the work on the front line is dirty, tiring and noisy, my parents emptied their savings to buy me a house in Xi'an. I already feel very lucky. Now the overall trend i…
There are so many weird job hunting situations nowadays. I had an interview a few days ago, for a private company with more than 200 employees, applying for a surveyor. There was a vice president there, and he asked me if I could read construction drawings (CAD). I said I had never been exposed to it, but I could draw (I learned this in college). Then the vice president said, "You just want to le…
had a job interview today. The location is Shanghai. I'm 27. Are you married? Do you plan to have kids? Yes, housing is provided. Housing is provided for the first month of trial work. You need to pay a deposit of 400, which is not refundable if you don't work for a full month. After you are assigned a position, you will need to find a place to live by yourself. You passed the interview. You will…
UP, you haven't worked in a small company before, right? Small companies are always like this, they want to be a team of one person. Also, the reason they mentioned the layoffs in big companies is not to question your ability, but to imply: there are many people like you who are looking for jobs, if you don't do it, there are plenty of people who will do it, so don't be too demanding, just make d…
work in a small company, and it seems that many people don't realize the seriousness of the problem. I am a little panicked now, and I am very tired now. After the big companies lay off employees, the laid-off people will go to the next level to find a job, and similarly, this level will also have a group of people laid off. And so on. In the future, it will only become more and more competitive.…
B station saw that I am also looking for a job [smile]
I totally agree. I have interviewed a lot recently. Some are outsourcing or large companies that require 996 and a six-month probation period. I have worked in a small company before and suffered a loss. I don’t want to go again. Now I am stuck. Small companies are not good. Big companies are starting to be competitive. It seems that normal jobs don’t exist at all.
Up, I still lack social experience. In an industry, if the upstream large factories lay off employees and shrink, then the downstream small factories will definitely be hit harder. It is obvious that those who are laid off think that small factories are good. Even if large factories are in a mess, they still have a stable source of projects and can maintain various costs. Small factories really h…
Let me tell you my feelings. I have worked in big and small companies for 5 years. I agree with what the above said. Then I thought it through. In the fourth year, I quit the job in the big company and went to a small company. The income is not high. I study for the postgraduate entrance examination while working. Now I am in the first year of postgraduate... I am thinking about joining a state-o…
I'm a student of mechanical engineering. I finally passed the interview of a central enterprise during the Chinese New Year. Now I've been working in a workshop for a month, working two shifts. The benefits are really good. Although the work on the front line is dirty, tiring and noisy, my parents emptied their savings to buy me a house in Xi'an. I already feel very lucky. Now the overall trend i…
This is true for small companies. Big companies want screws in the team, and you just need to do your part of the job. However, small companies usually have one person doing multiple things. One person has to know many things and be responsible for the work of more than two people.
The situation of looking for a job was the same as mine after I was laid off last year. Those who are looking for a job in Xi'an should know that, except for the better Internet and computer jobs, there seems to be no mid-level positions in Xi'an, all of which are sales and customer service [tv_laughing and crying]. Then the idea at that time was the same as above: find a suitable one or just fin…
feel that the up master's thinking is limited when working in a large company. He doesn't quite understand the division of labor in Internet companies. Take a restaurant as an example. A five-star hotel welcomes guests, serves dishes, cleans, takes orders, washes dishes, steams, cooks soup, stir-fries, and washes dishes. There are people working in each individual job. A small restaurant only has…
Speaking of layoffs, I am really speechless. Do you know that layoffs start with those who have just joined or have worked for one or two years? The compensation for layoffs is low. Have you never heard of n+1? It doesn't mean that your ability is worse than that of old employees. Which company will lay off old employees and give them a lot of compensation for large-scale layoffs? "Isn't it?" Hav…
When I just graduated, I worked in a state-owned enterprise, with no holidays all year round, and a monthly salary of 2k-3k [eye-catching], but the working hours were only five hours a day, divided into morning and evening shifts. But I was too eager to have two days off a week, so I found a small film and television company, thinking that I was only 22 years old and should be able to fight for a…
As a researcher in a small company, my job includes but is not limited to market research, making PPT, writing project bids, research plans, being responsible for animal experiments, human experiments, data analysis, research reports, project completion reports, writing SCI and core journal articles, WeChat articles, academic conference organization, material preparation, expert invitation, labor…
interviewed a company in March this year to be a supervisor and they also needed to recruit people. The company had 70 people in the office and not the factory. Then I interviewed several college graduates who had basic software tools. Of course, I didn’t care about the salary. They asked for 5K. I said it was too high. Is 3500 with food and accommodation okay? And I was responsible for their gro…
How did Bilibili know I was looking for a job? It's so funny that no one sent me an interview invitation
Same, I kind of regret not looking for another job when I quit. Now I feel like it’s getting harder and harder to stay in the same job. The environment is not good, and I don’t want to work anymore [Tsundere]
Let me share with you my recent job search. I graduated from an ordinary university last year, majoring in economics. I had advantages in taking the postgraduate entrance examination and the civil service examination, so it was difficult to find a job. My life was just average. After graduation, I took the postgraduate entrance examination at home, but I felt that I had no chance, so I went out t…
majored in mechanical engineering in my undergraduate degree. I was looking for a job two days ago and came across a small company that was a hotel equipment company, similar to decoration. They asked me if I could draw [eye-irritating] CAD. I didn't know how to do graduation design [hidden fox], and showed me the design drawing. Although it was a construction drawing, there were no annotations, …
returned from overseas and worked in a Fortune 100 company (outsourcing position) after graduation, earning about 15K per month. I came back and joined a Fortune 500 company in China, earning 8K per month in my hometown (third-tier city) (the salary was very low, but I accepted it because it was close to home). I have been lying flat for almost a year since I left my job... During this period, I …
Medium-sized companies are really easy to be acquired. The company where my father works is a medium-sized company. At the end of last year, it was targeted by a large company like 58 and was sanctioned for acquisition. As a result, my father is now unemployed... Now my father is not young anymore and I don’t know what will happen to our family in the future [crying]
Forget about finding a job. I have people bidding for my disassembly machine even when I set up a stall. I set the price at 888, and then others charge 666, 555, 444. Anyway, I won’t change the price, it’s always 888. I can play other games and hang it [crying with joy]
I just wanted to work for a company, but after working for a short time, I wondered why I chose this company in the first place. I quit, looked for a job, quit and looked for a job, and it kept repeating. I still had to find a job I liked and not waste my working time.
I don't want to watch it anymore. I graduated in 2000 and now I have only worked for three months. I am so anxious.
Good work is like love, you may have heard of it, but you will rarely encounter it [Tibetan Fox]
I feel like most of us in our twenties are facing layoffs and looking for jobs. It's fucking hard.
Small companies are all about one person doing many things! One person has to know many things, otherwise others will look down on him. They will not pursue the ultimate work results, they just want the ultimate cost-effectiveness, you! Unless you are a salesperson, you can do nothing except talking to customers. For other technical positions, they will definitely look for all-rounders.
It is very hard for UP masters to go from high to low, but it is easier for me to go from low to high. Now that you are still young, you can consider having a job that allows you to operate the whole thing, which is actually a good opportunity. Pick a decent company and work hard for two years. When you look for a job again, you can say "I worked in a certain big company, but later I felt that I …
Big data has discovered that I am looking for a job [Hot word series_knowledge increase]
Go abroad... This year's postgraduate entrance exam is super super difficult, and it's also so hard to find a job...
It's numb. In a small county town, there is no normal work except for the doctor's office. I worked in a small company, with only one day off a week, no five insurances and one housing fund. The boss has a strong sense of superiority and always sarcastically says that those who have no money are country people. [Speechless]
You can still find one. It's best to pick a better job first, either with more money or with two days off and get off work on time, and then work while waiting for opportunities to appear. It's easy to lose your mind when you don't have a job.
I work in the IT industry. I resigned half a year ago and haven't found a job. I found a job that is somewhat related to my previous job in a small city in my hometown. I won't talk about the salary, it's definitely a world of difference, but it's close to home. I'm tired of trying not to compete.
It’s better to do the short video work by yourself than to do it by yourself...
I just came out of a branch of a listed company, a branch with about 500 people. I was a salesperson there. Its work system and related systems were set up in accordance with the requirements of the headquarters, but the actual work was completely based on the "humanistic" operation of a small company. When something went wrong, they liked to push the responsibility, and I would be fired if I too…
Don't complain about finding a job, this is competition. I am very lucky that when I just graduated, I had a small company that could exploit me, polish me, and let me acquire the abilities that I should have. In the past few years, when projects were booming and everywhere, finding a good job was not called ability, but opportunity. In recent years, there are no projects in the market, and I was…
Really, I don't know about those with work experience, but for someone like me who just graduated, the boss starts talking about ideals and the future, and then when he asks about the salary, he says it's 2,800, which is the minimum wage in Shanghai, and he just says you just graduated and don't know anything...
feel that it is too difficult to earn a high salary by working now, but there are many people who make a lot of money by taking advantage of the gaps. Anyway, I am lying down. I used to work in a big company, but I couldn’t compete with my colleagues. I was also brainwashed by the strugglers every day. I was just a runner-up. There was a lot of work to do, but I couldn’t make any money. Now when …
In fact, you can just find a job that is neither good nor bad, and then continue to look for a job during this period. I believe everyone can feel the economic downturn in recent years. In short, don't be romantic about your every day. As long as you still have a job, you will have money to earn every day, and people with income will not panic. During this period, you can use holidays and rest da…
I am also struggling with the fact that I am doing repetitive work that I don't like in a small company. The big companies are far from my home. I feel that there are really no film and television companies in Chongqing. They are all short videos.
Personally, I think I should wait a little longer. If I really have to do the work of many people, what if I can't hold on one day? I think it's easier to get in than to get out, unless I really can't find a job I like and use this kind of job as a fallback. Since small companies are all like this, then I always have the choice of finding a job I don't like.
There is no such good job as the national football team [doge]
One way: I graduated from the Normal University in 2019. During my four years in college, I went to large companies for internships every holiday, such as New Oriental, Miele, Céline, etc. (large companies do not have as high requirements for interns as ordinary employees). I have been working in my third job for a month. My rich internship experience in college made my current manager notice me.…
Alas! In September 2021, I worked in a fairly large company in Shanghai. The food and accommodation were provided, and the five insurances and one housing fund were 5,000 yuan. The work was not very busy, but it was annoying, so I resigned. I went to Shenzhen and found a small company. As a result, I was exhausted. I got up at 6 o'clock every day to catch the bus and subway. The commute time was …
I've been looking for a job for a long time, now I'm starting to look for a job as a security guard and driver. I wanted to switch to video editing or new media operation before, but not many companies contacted me in a week. If I actively contacted them, they would just say "read it". It doesn't matter. I'm starting to look for a security job... [kneeling]
Small places are basically chaotically managed, and it is difficult to find a suitable job, unless the boss is your relative. I used to work in a small factory doing heat treatment. I thought I would do it first and then find a good one. I originally applied for a data clerk, writing orders, drawing temperature curves, copying product numbers, and of course serving tea and water, sweeping the flo…
used to work in Shenzhen, in a relatively large company, a design institute. The salary was not high. They said they would not work overtime, but they would use moral kidnapping to force you to work overtime. Although I have worked for more than a year, I have not worked overtime for a single day. The salary is not high, and after adding the rent and other things, there is basically nothing left.…
In fact, it is because of the monopoly of the platforms of large companies that everyone only needs to do their own job. The essence is the power of the platform rather than the power of the individual. Most non-monopolistic small and medium-sized companies still require comprehensiveness rather than precision, especially for non-technical positions. In simple terms, if you pursue a single and co…
When looking for a job, sometimes it really depends on chance and your fate with the boss. Small companies are not suitable for ambitious people, medium-sized companies are suitable for ambitious people, and large companies are suitable for people who have both ability, ambition and emotional intelligence. A 40-year-old aunt who has worked in Fortune 500 foreign-funded enterprises, state-owned en…
The lower the entry cost and the lower the market demand of an industry, the higher the degree of involution. I spent four years in college and went to a storage chip-related company after graduation. The training alone took four months. During this period, I was completely paid for the classes. After half a year in the department, I was still basically guided by the old employees. According to t…
hope the up master can do well. I have had a similar experience myself. I left my previous company after working for 4 years. Although I was not laid off, the company determined that the project could no longer be carried out, and there were many colleagues waiting to be laid off. I really don’t want to suffer any more. I really want to say that sometimes it is the company’s wrong decision that l…
I really feel like I can’t roll with the punches anymore. I got so excited that I did a PhD. Now I have nightmares every day that I can’t find a job after graduation [crying]
can say that as a security guard here, you can get about 1500 a month after paying the insurance. If your family is strong, you don't need to buy a house or a car. This job is really easy. If you work in your hometown, you don't have to pay for food and accommodation, and 1500 is pure pocket money. Generally, there are two shifts, one week of night shift and one week of day shift. The night shift…
Fortunately, I don’t have a job haha [Great]
It's so hard to find a job
It's good to work in a big company. Don't people in big companies have an annual salary of one million? If you go to a small company, you can at least be a director. How awesome! After all, those who can work in a big company are the best of the best! People in big companies are awesome!
Hello, are you looking for new job opportunities? Our company is recruiting relevant talents, salary 6-8K, 9 am to 6 pm, two days off, are you interested? How is it calculated? Basic salary 3K + commission, 2 days off a month
Most people are ordinary people without dazzling resumes. Are ordinary people human beings? Do they want to live? Excellent people do exist, but are they the only ones worthy of living? We just want to find a job to survive, not to be pushed to the edge by the environment! After all, ordinary people are the majority!
went to interview (logistics) at a company in early March. The person who interviewed me was a human resources and salesperson. During the interview, we felt good about each other. Then she said that they were going on a business trip soon (about half a month), and they hired a boy first because there was physical work of moving boxes. They also told me clearly that they needed to recruit another…
To be honest, the difference between a two-day weekend and a one-day weekend seems to be only one day, but one is working 2.5 days and taking a day off, while the other is working 6 days and taking a day off, which is more than twice as much.
In the same industry, I worked for three years before I found a company I liked. The work was very tiring, but I think it was good, because as the up said, there are too many companies that want to make money from short videos but don’t want to invest. Have you ever seen a company that wants me to shoot works like blockbusters, but is unwilling to buy me even a headlight? I can only be bad. If I …
College degree, accounting. In 2014, I was lucky enough to get a job at a European-owned factory in a Fortune 500 company. The factory closed in late 2018, and the company arranged for me to work at a subsidiary in Shenzhen, without accommodation and meals. I thought about it but didn’t go. Actually, I wanted to go, but my English is really bad. In the factory, except for sending emails and using…
am a network worker. Looking for a job requires not only routing and switching skills, but also network security, scripting languages, CAD drawing, database, and a certain understanding of cloud computing. These companies are shameless in recruiting people. They recruit network engineers. The interview requirements are all pie-in-the-sky future project managers, but in fact 90% of the time I spen…
Try not to apply to too many jobs. Choose jobs based on your desired salary range, location, and company size, and then apply based on the range. Then, apply based on the company's business, prospects, etc. This way, you can avoid many irrelevant interview invitations. If there are any rigid requirements, you can communicate with them online before deciding whether to go for the interview.
I hope you can find your dream job soon.
We have several public welfare organizations where management trainees with no experience from junior high school or high school education three or four years ago are now required to have a college degree or above and work experience. My childhood friend who did not graduate from high school has been promoted to a supervisor in another province in one of the small departments, but I can't even ge…
The same as the hospital regular training. The salary of a resident doctor is less than that of a resident doctor. I don’t want to roll up my sleeves for the time being. I will go home first after graduating from a master’s degree. [Tibetan Fox]
I have been looking for a job for a year. I am currently working in the aquarium industry (raising animals in an oceanarium). I have been working there for a year now. Because this is my hobby, I don’t feel tired when I work. In the second-tier city of Jinan, the salary is 5,000 to 6,000 yuan [藏狐] I personally think it is not bad because it is close to home. From the beginning to the end, I have …
It's so true. I'm a designer, but I was forced by a small company to do copywriting, photography, and editing. Because their product packaging can't be changed for a while, the boss just doesn't want to see me idle. Now I'm lying flat, working in a general medium-sized printing manufacturing industry, working like a factory assembly line every day, not brain-intensive, not very tiring, no overtim…
just switched from a small company to a medium-sized company. I feel so deeply about the disgusting routines of small companies. I worked in a small company for 7 years because of nostalgia. I have 4 years of experience in the whole chain of public relations planning, 3 years of experience in short video planning, script editing and operation, and I have created accounts with millions of follower…
Those who do scientific research know this well. If you can't find a good job, it must be your own problem. Isn't it just publishing a few more first-tier SCI papers? Isn't it a national award? Isn't it just about being innovative and practical? Isn't it that difficult? [Insidious]
People who come from big companies simply cannot adapt to small companies. I have worked in a small company before, and I can say that you need to do the work of a team by yourself. But now that I have worked in a big company, I know that it is not stressful to complete the KPI of a big company! Everyone has a clear division of labor, and the salary is also easy to get.
To learn about surveying and mapping, you need to work more than 6 days a week, with overtime about 7 days a week. The work location is in the countryside (air conditioning may not be available, and taxis may not be available). There are job requirements (100% field work, forget about makeup). The educational requirements vary, from junior college to a master's degree from Wuhan University. The s…
I am still looking for a job after the layoffs in the education and training industry. I was optimistic at first, but the standards have been lowered and there is still no one suitable for me. I feel emo every day.
Just keep looking. If you don't like a job, you will have to change it anyway. Why bother?
I'm also looking for a job recently. A small accounting agency asked me to organize documents as a clerk and do accounting at the same time. They also asked me to be an accounting lecturer, record and edit videos, and finally be responsible for new media marketing. It's so funny that there are so many tasks, across industries, and I thought the salary would be tens of thousands, but they gave me …
Call me Kang Kang. Now the schools teach PS, Maya, AI, etc. I taught myself 3ds, Marmoset, ZB and other modeling software. In the future, schools will also teach special effects video editing. Why can't I find a job after watching this? Is it because it's not competitive enough?
just quit my job about a week ago and interviewed a home decoration designer who does renderings. I was working on graphic design before and didn’t want to go. The HR followed me for three days and I thought forget it, maybe they also have tasks. Since it’s close to home, I’ll just go and have a look. Oh my god, that boss made me speechless. I’ve never been so speechless in my life [smile] He sai…
It’s indeed hard to find a job.
It's even harder to get by in third- and fourth-tier small cities [covering face]. I'm in an operations position. I have to do product planning, event planning, website SEO, public accounts, self-media, and short video operations, including but not limited to editing. I also have to be able to do simple post-production and design. This year, my boss has added a new task, and I have to do regular …
You don't understand how competitive the Internet technology interviews have become. They start to complicate you from the beginning of the interview. Those with more than 5 years of work experience will use what they know to ask you all kinds of questions, no matter how much experience you have, even if they have just learned about this thing.
Let's talk about the underlying logic of hiring in small businesses. First of all, the core issue that small businesses have to face is survival. Human resource expenses are one part, and there are some other expenses. So it is impossible to open high in terms of salary. If it is opened high, everyone may not be able to survive. Secondly, there is a lot of work in the early stage. There is no way…
The reality is that there is an oversupply of jobs suitable for college students in society. There are not so many places that need college students. It is easy to find a job that can make a living. Some industries are too short of people. If you have to choose a job that suits your professional interests and salary requirements, you can only continue to apply.
Ahhhhhhhhh, me too [crying][crying][crying] I have an embarrassing interview tomorrow, and I can’t find a job I like [crying] After watching the up master, I realized that we ordinary people are all like this
I have made up my mind. If I can't find a job, I will learn how to operate tower cranes and mine trucks. I will learn a skill and do it badly.
In this world, it is hard for undergraduates to find jobs, and junior college graduates can only work as factory workers.
As a person who is on business trips for projects, the company I am working in now does not have any holidays or weekends off. They will not give you double wages or benefits on holidays. The senior management are all relatives of the boss, and the mid- and senior management are all old hands. They make 7-8k a month, and hundreds of thousands at the end of the year. They sit in the office all day…
Recently [covering face] I also interviewed three companies today. Two of them were small companies [covering face]. They all had the same words. I applied for a graphic design position and asked how many designers the company has now... One said that there are no other departments doing concurrent work... One said that there is only one designer but he has a lot of requirements... He has to take…
I am the only one doing the related work of a company.
After watching this video, I am a little worried about whether I can find a job after graduation. I hope there are still positions for algorithm positions.
The more competitive you are, the more work you have to do. A handyman means running around every day, helping here and there, and you still have a lot of work to do, but the salary hasn't increased much. Every year, many companies have fixed positions that are not filled, so they recruit workers, just like a training department, with a group of people coming and going.
This situation will become more and more serious in the future. Everyone has higher and higher education and wants to do "high-end" jobs. The competition is too fierce. If you don't do it, someone else will. On the contrary, there are fewer and fewer manual laborers, and it is difficult to find people.
Give yourself some time to find a job you like.
Most people's salary is not proportional to their work effort.
Why not play for a few days before looking for a job? People are not machines that can work endlessly. Let yourself relax.
The 24th batch of non-key universities have started to get anxious... My grades are mediocre, I can't get a guarantee, I don't know if I can pass the exam, and I feel like I don't know anything about work, and I don't have any internship experience.
When you work, money and happiness always account for the same proportion
Finding a job is like finding a partner. Don’t look for it in a garbage dump. Yes, most small companies are garbage [tv_rolling eyes]. It would be really uncomfortable to go to a company you don’t like, and you will have to leave in the future. It is better to do it in one go and don’t be so anxious. Take a break for a while and give yourself a break.
have been working for a small company for more than three months, and I have only received my first month's salary. Oh, there is not much work, less money, and it is delayed. They wanted me to work in another city and take another position, but I refused. I know I can't stay in the company, but I don't dare to quit immediately. Blame it on me being too green [crying]
Only those who have looked for a job know how bad the current environment is. People who don't feel back pain when standing will say you are wrong no matter what you say.
There are still many students on Bilibili. The overall environment is not good this year. The up master is engaged in the new media related industry. I happen to be a headhunter in the new media field. Last year, when the overall market was still okay, I got 7 new media brand-related offers in an artificial intelligence technology company in three months. The annual salary ranged from 200,000 to …
saw someone in the barrage saying how nice it is to lie at home. If you are a second-generation rich and lie at home every day, I don’t care. In order to survive, you have to go out and find a job. If you don’t think about your future when you reach the corresponding age, then I have nothing to say. Many people have learned to make money before entering the society in college, but you can only li…
Many companies have laid off employees this year, and the job market is oversupplied, so these companies have started to think about hiring at a loss [doge], buying high-quality stocks at a low price. There are already ups on B station that have exposed this phenomenon. That is to say, many excellent talents are being laid off now, and companies also know that there are too many people and too li…
want to ask something. I have been reading the comments for a long time and I feel that it is really difficult to find a job nowadays. Is this the case throughout China or just in developed cities? Many people say that their salary is only two or three thousand, but the people around me basically make four or five thousand. Located in Shenyang. I am currently in high school, but after reading the…
I started to give up a long time ago. In 2016, I was also in a big company. The company adjusted internally and the whole department was laid off. I got compensation and went to look for a job. I was doing e-commerce design, and I also wanted to find a small company. I interviewed 80 companies, and 76 of them required photography, 3D, customer service, operations, and the ability to do hard labor…
came here based on the number of likes. If you want to find a good job, you should be prepared to interview for a month or even longer. I am a manager in a company. I can get a job in a large company, a medium company (I got four posts unexpectedly), or a small company. I am more concerned about whether I am worth the money, because the market for human resources design is still relatively compet…
The environment of most small companies has always been like this. Anyway, I have found many jobs as a post-production worker and changed many companies. Regardless of whether there were layoffs or not, the conditions were the same: a post-production worker must be able to shoot, edit, write scripts, and run. The salary is also low, 3,000 a month, and after a long time I even think it is reasonab…
As long as it's a small company, it doesn't matter what industry you're in, you'll be asked to do any work but won't be paid.
I also worked in a small company. There were only 10 people including two interns. Although I didn't have to work overtime, the work I was responsible for was really miscellaneous. [Great] I left after two months [Speechless]
[Eating melon seeds] No matter what job you are looking for online, once you contact this position, are you considering delivering food? Monthly income 50,000-100,000
It's hard to find a job for someone like you who is neither high nor low
Since you make me do so much work and pay me so little, don't have any expectations of my work results.
Don't look for a job, I'll steal mines to support you
When I look for a job now, I either want a high salary or an easy job with less work. I have to choose one of the two. I haven’t even talked about the money, but the boss still talks about the workload [laughing and crying][laughing and crying][laughing and crying]
think this is the most basic unspoken rule. Large companies can tolerate many people who are slacking off. Even if everyone is slacking off, the advantages of numbers and clear division of functions lead to a bottom line for everyone to slack off. Basic work will eventually be completed. The most profound problem faced by ordinary employees in large companies must be the stability of the leadersh…
Hey, I just need to be alive now [spicy eyes][spicy eyes] My previous job was my boss, her sister and I, a total of 3 people. At the beginning of the interview, I was told that there would be an old accountant to guide me, saying that the old accountant had taken leave these days, and the trainee accountant would get 1,000 a month for 6 months of internship, without five insurances and one fund, …
was the only one responsible for the script, filming, and operations. I was exhausted, the salary was not high, and the work environment was very weird. My first job in life was hell. [2233娘_大泣]
Wait, post more videos before you have a job, I will support you with coins [脱单doge]
Just like you, there are a lot of stupid bosses in small companies who don't know anything but want to learn from others to make quick money but are unwilling to invest in finding a job. I am so depressed.
I went to a small company with about 500 employees, and they limited my salary increase to 20%, but in the end they actually gave me 16% [藏狐] and they also said (if you ask for a high salary, we will have high expectations for you, and you must make achievements, otherwise you will have to grow slowly at a lower rate). I remember that at this time last year, when I went out to look for a job, the…
Which city does Up work in? [laughing and crying]
In fact, because the work in large companies and factories is more detailed, the employees (referring to ordinary employees) who come out of large factories are actually not as fully capable as those who have worked in small companies for one or two years.
...Oh my god, sister, don't pay attention to the spiritual capitalists in your comments. I hope you can find a relatively happy job [love]
It’s hard. It’s hard to find a job now [laughing and crying] I see that it’s really like this now
Station B's push was very accurate this time. I understand my sister's feelings. It is still difficult for a fresh graduate from a third-year university to find a job. I have already lowered my salary expectations, but it is still difficult to find a job. It is a waste of time to improve myself. I feel that I should apply as much as possible. It is really insincere not to have any attachment to t…
Find a job you like
I graduated at the age of 21 and I am two points away from the second exam. I have been looking for a job for a month. I worked part-time in a small company before and it was terrible. I had to know how to do everything [smile] and the boss had no vision and weird ideas. He always blamed the finance department for all the problems.
I have seen some very strange recruitment information. There are those for event staff with a salary of 2,000 to 3,000 yuan, and they are required to know several languages. There are also those that require fresh graduates to have 2 to 3 years of work experience. Ah, it’s really hard to tell whether the recruitment information nowadays is written by humans [laughing and crying]
There is too much work in China where the effort and reward are not proportional. This is not a negative statement, it is really the reality. Don't be fooled by the fake appearance. [Tibetan Fox] Come on, it will change in the future unless ~
Suddenly I feel that finding a job is exactly the same as finding a partner. Small companies and people with a lot of work have the same requirement: you have to work harder but eat less. It's so similar. [tv_笑泣]
[Eye-sore] In Guangzhou, my salary is low enough, everyone is competing for jobs, and the cost-effectiveness is higher than the other [Great] The HR interviewer said, your ability is the best, the salary is also the highest, but we don’t need such a high ability
Financial crisis, do you think it is easy to find a job?
If you don't work, you can keep posting videos to increase your followers.
[Laughing and crying] My contract is about to expire, and I saw this video. Is this trying to persuade me not to renew it or to tell me to find another job [Cover face][Cover face]
completely, from the first short video job, although I didn't have to do editing, I had to communicate with the anchors and be the anchors' agent, with a salary of 6.5k. The second short video overall process business was done by me alone, all-inclusive 8k. It's almost the same as the first job now. I did everything in the first three months, working hard in a department by myself, and then I hir…
It's OK. I think it's easy to find a job. Construction sites are hiring people everywhere [doge]
Up probably hasn't been to a small company. It's not just the Internet layoffs that cause them to be rotten, but small companies in all industries are so rotten, at least most of the small companies are so rotten, and one person is doing the work of a team. I returned to my hometown from Shanghai in 2021 and worked in a subsidiary of a branch of a large group near my home. This group is also the …
I'm a fashion designer, but I don't want to work in this field. Why? A small company has a lot of work to do, and the salary is only a little bit. If you give me 7000-8000+ a month, I will work overtime all night without weekends, and it's no problem to finalize 10 sets of designs.
Have you ever thought that the reason may be the endless vicious competition in large companies in the past two years. In the past few years, large companies have expanded their businesses, and the salary of campus recruits is higher than that of old employees with several years of work experience. This phenomenon gives those employees who enter large companies a false impression that they have h…
If you look good, it may be easy to find a job. This is a world where appearance matters. Come on.
The first job I had was in a small company, but fortunately, it was a really small and beautiful company. The benefits of the department were good, the relationships were good, and the work was interesting, so interesting that everyone was very proactive in wanting to take the job. Not only was it interesting, but you could also learn a lot [OK]. Now that I think about it, I was really lucky.
Come on, I hope you can find a job you like!
My personal opinion is that if you have the ability to find a job, you must find a suitable one. If you don't work hard, you will not be able to get a job with good pay. [doge]
From a business perspective, the current market environment is a disadvantage for job seekers. If you want to find a job, you may have to make some concessions.
As an HR in a small workshop, I would like to share the work and job-hunting environment around me. I think the term "tanking" does not apply to the situation of some small companies. Tanking generally refers to someone who can do the operations of a big boss, but deliberately makes mistakes. However, many small companies have no idea at all, and they just rely on the times or background bonuses …
If I really can't find it, I might as well live for myself and go it alone. What's the point of struggling in a company with no money and no future? In the days without work pressure, I want to write a book. Even though I'm a failed author and few people have read it, I'm happy. I've thought about making videos and creating my own media. Although I don't know what I can shoot, I can shoot whateve…
Please don't do a job you don't like.
People go to higher places, water flows to lower places. How can you change jobs and get lower wages?
The construction industry is also in a state of turmoil. Large construction companies have stopped work, leaving a bunch of managers. Dozens of people apply for one position. Those who have worked for 10 years are all young people. Now they either lower their intended salary or take on all the work. After four months of hesitation, I chose the latter, the job of production manager, with the salar…
Coupled with my age, I really just want to give up the job I find.
I found a job after graduating in 2020. I earned over 7,000 yuan. I thought it was the starting point, but it turned out to be the peak... It is getting harder and harder to find a job.
Place an ad. I hope it can help those in need. Beijing, security guard, 5 hours work per day, 3700. Five insurances, food and accommodation included (up can be deleted if you think it is inappropriate)
I feel the same way, sisters. I started looking for a job on February 20th, and I was really anxious until March 20th.
Hug the up master, I also feel it is difficult to find a job recently
When looking for a job becomes looking for a husband
You can also apply for unemployment benefits. Play for half a year and then look for a job.
The uploader is still quite young, and the division of labor in small companies has always been like this. As for salary, you have to negotiate it yourself. The salary in large companies is generally fixed. So the uploader himself is not confident and has no clear concept of whether he can be responsible for the entire work.
Going to a company you don't like and doing a job you don't like is like going straight to jail
Company: I hope you work for free and create great value, of course, you'd better pay me
Alas, the average monthly salary of Weibo users is one million, and everyone who looks for a job at Bilibili is wronged. Fortunately, the young people are suffering.
Enterprises are facing difficulties in survival. They should adjust their mentality. Salaries and work intensity may not be as good as before. Enterprises are also in trouble. Office workers should also adjust their mentality and face difficulties with enterprises.
Keep looking. Let's not talk about the job content. The salary is not proportional to the work. If you don't like the company, you will not be happy even if you slack off. Sooner or later, you will leave.
Likewise, it is hard to find a job.
It's very difficult. In recent years, there are too many people majoring in business and management but not enough people are needed. People majoring in science and engineering have gone to the Internet industry. Every day, few people majoring in science and engineering are willing to work in the manufacturing industry. A few days ago, a large number of fresh graduates majoring in electronics wan…
There is a big motorcycle company. I bought a motorcycle from them. They said they were hiring. I said sure. I noticed that your company doesn’t have any internet marketing. Then they said they wanted to hire a girl. It’s sales. You all know. I’m a man. Although I have a good image, I’m not very willing to do it when I’m half-spoken. Then they started to hint that they wanted me to do sales, vide…
Don't do a job you don't like. In the end, you will get nothing and even feel like you wasted your time.
Community worker, earning 4k a month, helping to pay five insurances and one housing fund, the problem is that I just graduated last year [藏狐]
It is so difficult for travel managers to find a job after graduation [speechless]
I think the biggest difference between a big company and a small company is that one manages people through rules and regulations, while the other manages people through people. It has nothing to do with the number of people. Once rules and regulations are in place, the certainty of work will be much higher.
After I found a job, I like to watch this kind of video [吃瓜][吃瓜]
Yes, that's how small companies are. In addition to my main job in a small company, I also work part-time as a courier to ship origami shells.
You have analyzed it very clearly. Don't take a job that you don't like and that doesn't pay you.
The involution of the market is more caused by real estate, because the mortgage for buying a house is 30 years, and you need to repay the mortgage during these 30 years. You can't lose your job. No matter how much the company oppresses me, I can only endure it, because if I stop paying, I will have nothing. After paying off the mortgage, I can't relax, because I still have the mortgage for my ch…
This is one of the drawbacks of large companies. Large companies are like large machines. Everyone only tightens the only screw in front of him. Over time, his ability is actually very limited, and he will not be suitable for another job. It is equivalent to starting from scratch. The salary of large companies is indeed higher than the market average. The reason is not because of how high the abi…
Now 90% of jobs are not proportional to income. Many people say that the end of the universe is the establishment. In many public institutions or government agencies, it is normal for one person to do the work of two or three people. Don't think that the system is very leisurely now. So first you have to solve the problem of food, and then enrich yourself, so that you may have the right to choose…
It's so hard to find a good job that you like.
I suggest you interview carefully instead of applying to many companies. That is tiring and your performance will not be good. You can interview three companies five days a week, then summarize the reasons and spend more time looking for companies. You should understand the companies you need to interview, the positions you want to interview for, and the work status you are pursuing. I think time…
It's determined by supply and demand. If your position is in great demand but there are very few people who can take it, then you can raise the price. Stay calm. It's just a job. Go if you are suitable. Best wishes [applause][applause]
If you don't like it, why do you apply in the first place? If you apply to any company just for a job, you should be mentally prepared to do a job you don't like from the beginning.
Guangzhou, 27 years old, advertising industry. The market is very bleak this year. In Q1, I heard from people in the industry that there was no business. I interviewed about 10 jobs in one month, and only 1 in 3 offers were given (I missed one of the intended ones because I was waiting for the reply from another one). The week when the epidemic recurred was particularly quiet. This week, I interv…
Same situation as above, I am now working part-time on a weekly basis to cover rent and living expenses, and then looking for a suitable job [crying with joy]
I was also laid off years ago and can’t find a job [grievance]
I stayed in Guangzhou for more than a month and interviewed for more than a hundred jobs, but I didn't find a suitable one.
hope you can find a good job and wait a little longer.
Too real, the word "video" is running away and it's another job operation copywriting shooting that you have to take care of by yourself
Try to find a job you like. It's easy to get stuck in a job you don't like and a company you don't like.
I am 33 years old. The first question in the interview was: Are you married? I answered yes. The second question was: How many children do you have? I answered no. The third question was: Do you plan to be a DINK? I answered no. Conclusion: Sorry, you may not meet the requirements of our company. I was interviewing for a position in a state-owned enterprise that required technical skills. But thr…
have found a job as a transitional job after graduation, as a store artist. I have to do shooting, editing, photo editing, post-production animation, instruction manual, APP interface, and UI design by myself. The problem is that during the interview, I was told that I only needed to do some photo editing, store details, and homepage, etc., but after one week on the job, I was assigned to shoot, …
I just resigned from such a small company. I worked there for three months. My boss knew nothing but pretended to know everything. He suppressed me and my colleague (my only colleague) every day. The salary was so low and the work was so busy [confused]
I have been working in the field of film and television special effects for many years. At that time, I was only working on cartoons. I was the only one who did the special effects and lighting in the post-production. There was only the supervisor and me in the special effects group. This industry is not bad. I hope you can find a job you like. I feel a little regretful about changing my career, …
am in the same situation now, but I don’t have any special skills. But I think it is really important to find a suitable job. So I hope you can find a suitable job!!! Let’s all work hard. [grin]
Come on, sisters! I worked in the education and training industry for six years as a researcher, but was laid off a while ago. I have been looking for a job and have just started working. You really need to take a chance! Many companies look down on education and training. They will say, you can’t teach adults because you teach children! I also hit a wall and found my current company, which is no…
Real life: research, proposal writing, bidding, contracts, video editing, cost estimation, drawing, project management, public account operation. Sorry, my family members are too enthusiastic. I am now on the road to finding a job [doge]
Finding a job is a mystery, does anyone agree? [Laughing and crying]
failed the second attempt at the postgraduate entrance examination. I have no work experience. I majored in industrial design. I know a little bit about everything but am not proficient in anything. I know a little bit about modeling, PS, and AI. I won an award in my junior year, but I don’t know how valuable it is. I passed the interview for an editor assistant position, which has nothing to do …
Keep looking, everything needs a balance, this type of job is not desirable.
The reality is that you think you can’t find a job because you think too highly of yourself. If you lower your status and look around, you will see that everyone else is lowering their status and “looking” for a job [Great!]
If you still have some savings, continue to look for a job you like and a company you like. It is really tiring to do a job you don't like, even if the salary is higher than you expected.
I don't have any skills, and I'm not forced to do multiple jobs. I like to do multiple jobs for one salary. I'm almost dead poor, but it doesn't matter. I won't be stopped from dying. I just look for a job with nothing else mixed in. Basically, there will be some mixture, but some directly require you to do multiple jobs. So being an ordinary person will starve to death. Is there anyone like me? …
[Canghu] I am outsourcing to the hospital now, working from 8am to 5pm. I usually buy breakfast in the cafeteria and eat until almost 9pm, then do a nucleic acid test and go to the bathroom. I don't have much to do on weekdays. I have a separate office and no one is in charge. I thought the salary was too low and boring, so I was going to quit my job in June to find a new one, but then I saw this…
My personal understanding of the concept of medium-sized enterprises: small company < salary < large company workload < large company < small company large company > = benefits > small company [OK]
Given the current social situation, it is estimated that it is difficult for you to find a job you like. I have a suggestion. You have the ability and there are many job seekers with the same idea as you in the society. Why don't you start your own company and recruit these people to work for you?
It's true. I said something similar under a video some time ago, and many people criticized me, saying that it was just my own people who were not good enough. The layoffs in the past two years have been so severe. I heard from people in a certain factory that they laid off one department after another, and some people in a certain project just packed up and left. They were still optimistic. When…
feel like there's too much unequal work.
I just want to say that even in state-owned enterprises, people will do excessive work for a certain salary.
After the Chinese New Year, I was also looking for a job. Because I was preparing for the postgraduate entrance exam before the New Year, I probably had one year less work experience than my peers. Then I spent a week interviewing seven or eight companies. Half of them passed, but I felt that they were not what I wanted. Until the last day, I thought one was good, so I quickly started working. On…
Hey, now I think having a job is enough [crying]
Help, I feel like I'm going to starve to death in the future [eye-watering] Prices are high and jobs are hard to find, I can't compete with college students and graduate students, I feel hopeless every day [soul out of body]
Young people should study hard while they are young and improve their academic qualifications. If you are competing for work or study, you would rather compete at school. I feel that even undergraduates are not competitive now, so you have to take the postgraduate entrance examination [doge] I will take the second exam next year, and then I will study for a doctorate after passing the postgraduat…
My personal advice is, no matter how bad the job is, at least have a job first, otherwise it will affect your mentality more or less over time.
Really, it makes people have a lot of questions. I have also experienced this. I resigned from a central enterprise because of hair loss. I changed 4 companies in one year. Each one was weird. From the beginning, I just wanted to lie down. I can accept less money and less work, but less money and more work? I am not incompetent, but there are more things to do. Why don’t I find a job that pays mo…
have been working in real estate. I switched from copywriting to planning. Now I am looking for non-real estate jobs and looking for copywriting and planning. Logically, copywriting and planning are separate positions. I think I can do both, but almost all companies require me to know graphic design and video shooting during interviews. I said that I am only responsible for copywriting, planning …
I have worked for more than 10 years and have changed 4 companies, both large and small. In large companies, when you go on a business trip, they will assign you a marketing specialist, who will not worry about your food, accommodation and transportation, and will help you reimburse your allowance when you return. In small companies, you have to book tickets, book hotels and contact clients, and …
The reason is that there are more college graduates every year than those who just graduated from junior high school and high school and start working. How can they not be competitive?
work in a small company [eye-catching], with less than 15 people including the boss and the cleaning lady. I am the only one who does video shooting, scripting, editing, photography, and art design. Because I am a latecomer, my salary is also very low. The workload is super heavy every day. I have to be busy shooting videos and cutting videos for the anchors who bring goods, and I have to make sa…
interviewed with a company a few days ago. They said it was no problem and asked me when I would start working. They also added me on WeChat. Then I went to the company according to the start time. They said that it would not count if they did not give me an offer. It was a waste of my time. I was speechless. Those small companies are really ridiculous. They offer 4,000 yuan for 6,000 yuan of wor…
I'm looking for a job while I can, hoping to find one I like.
It's best to open your own studio and be your own boss, haha
Small companies are like this, the organizational structure is not clear. Many people are responsible for multiple tasks. But the requirements are not as strict as those of large companies. The salary is also far less.
I am also very anxious about finding a job now.
You can't find a job these days if you can't brag
The advantages of a small company are also obvious. After working for a long time, the boss will ask you to rush to do various tasks. I myself learned how to start discussing projects from the wine table and how to work all the way to audit and get paid in a small company. This is actually quite good. Although the treatment in a big company is good, you are just a screw.
I'm almost 30, and most companies near me want people under 28, no matter if you have experience or not. Now you can only choose sales or working in a store. I want to switch to a clerical job, but online customer service jobs with two days off a week don't want people this old, it's so embarrassing
Originally, I was looking for a job and couldn't find a suitable one, so I worked part-time as a food delivery man. However, due to the recent severe epidemic, I didn't dare to go. Now I have no choice but to find a random job. [Laughing and crying][Laughing and crying] It's so painful
If you don't like the company, the job you don't like, and you can't stay for long, you will become more anxious after repeatedly leaving the job. I am more in favor of finding the job you want, at least the job you want now.
The survival of large companies is worrying, and small companies will not have an easy time either. We all live in the same market, so how can large companies be in danger? Small companies can still go smoothly. In this environment, they definitely want some employees with a high salary-to-performance ratio. Finding a job is a two-way choice. If you don't like small companies because they have le…
Working in a factory is too embarrassing, doing sales work is too tiring, working in an office is too low-paying, and I can’t pass the civil service exam, and I don’t dare to start a business. What kind of job is hard to find? It’s just that the actual conditions don’t match the beautiful fantasy.
I have a deep feeling. I came from a big company and thought that working in a small company would be easier, without all the intrigues between departments. As a result, I get one salary but do the work of several people. If there is a problem in any link, I will be fully responsible. The fact is that it is easy to make mistakes when one person does many jobs. The nerves are always tense, which i…
resigned in October and took the postgraduate examination in December. The results are out. After passing the driver's license test, I have to start looking for a job again. I am very grateful to the up for describing the real job-hunting environment, which made me understand the difficulties of various industries. Only when you join the work and enter the society will you understand the difficul…
Why don't you start your own company so you don't have to look for a job?
The standpoints are different. Generally speaking, job seekers with average abilities are enough to meet the basic business needs of small companies...so their logic must be based on finding job seekers with average or high abilities at the lowest possible salary. The logic of large companies looking for employees is the opposite. They do not lack job seekers with average abilities, so their expe…
am currently working for the largest company in this industry in my city. We don't rely on layoffs to recruit employees, we all rely on ourselves to run. Whether the work is busy or not is also determined by season. When it is not busy, they will try every means to deduct your salary, and in the end it is difficult to get a basic salary. When it is busy, I thought the commission was high, but the…
And what kind of situation is it? You are busy with work every day and you are too lazy to do these things. People are bored and say that you
I was looking for a job a few days ago, and after I got the job, I found out that the company didn’t pay social insurance. The HR even asked me: Isn’t it normal for a company not to pay social insurance? I was shocked. This is a first-tier city... Well, I’m not standing high enough [呆][囧]
Here is an idea for you. For now, don't consider whether the company is big, medium or small. Instead, look at what you are going to do and whether it can make your resume shine, comparable and valuable in the future! In fact, the company's name is empty. In the end, it comes down to whether the individual has the ability, technology and potential to surpass everything. In this process, you can t…
When recruiting for post-production, they asked if you can shoot. It is easier to edit your own shots. Can you write scripts? It is definitely easier to shoot your own scripts. Of course, you have to publish and operate the account yourself. You know your work best. Salary. Our base salary is 5k. Is it too much work? As long as you can prove your value, your salary can be increased in the later s…
I'm already numb, I've been looking for an accounting job for several months [laughing and crying] and there are still fake recruitments, speechless
It’s hard to find a job now due to the epidemic, so think twice before resigning. [doge]
I remember when I was looking for a job after graduating from college, I studied finance, and my goal was to be an accountant or cashier. During the interview, the person said that I could do telephone sales. I was like:? I know myself well, I have low emotional intelligence, I am not good at speaking, and I stutter when I am nervous. I said I am not suitable. He asked me how I can be sure that I…
After reading all the comments, I feel like my current job is OK... I graduated this year and am doing an internship at a factory. I have to work overtime and don't have two days off a week, but at least I'm not too busy at the moment.
years of front-end experience, looking for a job for 1.5 months, 2 companies started working for 1-1.5 days. I interviewed with two companies on Thursday, and a medium-sized company called me. After 1.5 months, I finally found a job.
Do some simple part-time job that doesn't make much money but can support life, and wait for the job you want, business is also okay?
Otherwise, if you go to a new company, you will still dislike it and the work will be very painful.
Don't think about it. There are far more jobs than positions available.
I work in a large logistics company. Let me put it this way. Meetings are always held after get off work, with no overtime pay. There are meetings five days a week. All departments have to learn and know more than them, and there are multiple departments. They call it: quality inspection requires knowing everything, and the salary is still low [eye-catching]
Those working in small companies, please raise your hands. My boss has asked me to recruit for a short video position in the past two weeks. The job also requires the ability to shoot, post-edit, and operate accounts [eye-catching]. The situation is really similar. I wonder if the up is also in Hangzhou. Many applicants have also come in one after another. Most of them are former employees of lar…
Go ahead and look for one. I have to continue looking for a job too.
What is a small company with 10, 20, or 50 people? In many cases, this cannot be called a company. I think it is more like a small team. Generally, the small companies I know are at least 100-200r. They have a basic structure, but it is not so complete. Medium-sized companies are basically 500r and above. It depends on how big a large company is. In fact, there are many small teams of dozens of p…
My boyfriend used to work for a small company owned by a relative. There were only three of us, including him. He has been working there for about four or five years. Since the beginning of this year, he has been looking for a job and has interviewed nearly 10 companies, most of which were internal referrals. Many resumes submitted on the website are not even looked at. Even so, it is still very …
There is no other way, you have to work. Good jobs require high education and strong ability. If you don’t have it, you can only settle for the second best and make compromises. When I went to look for a job, Xinyi’s workplace directly said, “We don’t want you if you have a bachelor’s degree [crying]”. My friend’s requirements are higher. The company she wants to work for said, “You have a master…
It's hard for people like up who have work experience in big companies to find jobs, I feel like it's even harder for useless people like me [eye-sucking]
My first job was also in a small company [doge]. The tone was the same, "We are a small company so we have to cut costs, and one person has to do a lot of work. If you go to a big company, you will be assigned to a specific task, and here you can learn everything." This and that, and then I was responsible for the import and export of the project, the delivery date, the connection and urging of c…
She may not understand one thing. She is lucky to have a class now, but she is still picky and confused. If there is a job, take it first. Don't wait until there is no job and then regret it. If there is a job of sweeping toilets, take it first! [脱单doge]
In the past ten years since I entered the society, I have changed many jobs and worked in many industries. I remember the only job I was fired from was the first face-to-face sales job. At that time, I had just started to work and was relatively introverted, so I began to doubt myself. Of course, I would not choose to continue to work in a similar industry because I knew that this was a shortcomi…
It is true that finding a job depends a lot on luck and personal career planning. Doing a job you don't like will only make you feel worse and waste more time. If you don't have financial pressure in the short term, you should think about it more carefully.
In my previous job, I had to be able to take pictures of products, design layouts, and be creative. After that, I had to be able to edit videos and record them. This was not the most terrible thing. The most terrible thing was the client's requirements! The boss's requirements! I had to save two different PSD designs separately. A set of pictures would take up several GB. And you had to remember …
Everyone knows about China's working environment
I am now working while looking for opportunities
Let me tell you about myself. I work in real estate human resources. I was in the top 20, but No. 1 was laid off. I got n+1. The main reason was that our business was shrinking and we stopped acquiring land, which resulted in the layoffs in basically every region. And I was the one who negotiated for them. Basically, all the conditions were in place. n+1, if you need some time to find a job durin…
No, why do I feel that your salaries are not very high after reading more than 30 comments? ??? When I was an intern at university, the company's salary was 2700 and they said it would be around 4000 after becoming a regular employee. After I graduated, they told me it would increase to 3000. I said I didn't want to do it anymore, and they said, "Why don't I apply to the company for a 3500 increa…
UP master, think carefully about whether you have reached the end of your value to the company when you are faced with layoffs. There are many people who are better than you. No job can be high-paying, low-work and close to home. Don't aim too high. I recently recruited a fresh graduate. He asked me for 5k and knew nothing. In the end, I directly found a 45-year-old sister who was experienced, ea…
It's not that the job-hunting environment is unhealthy, but that it's too competitive. . My current company has 800 people in the factory where I work now. Logically, the department is responsible for safety, environmental protection, occupational health, fire protection, and the management of two workshops with more than ten workers. In a normal company, there should be at least 8-10 managers. I…
am the only one in our department. I have to coordinate the publicity work for various projects. Do you understand my pain? Up master [Goodbye]
I am a liberal arts student. Recently, when I was looking for a job, my boss asked me to work on data and quality. I was confused. Data is fine, but what is quality? I am a liberal arts student, not a science student. When I wanted to run away, my boss gave me a raise and someone to guide me. The salary was about 8,000 yuan. Then I turned on the computer to study after work. As long as the money …
I suggest you find a small company to work for first, then continue to look for a job you like, and leave when you have achieved something.
Changing jobs is like moving from one pit to another. There is no best, only worse.
I am also looking for a job in the IT industry. But I am now super confused and anxious
My dad works in a private company like this, he does the work of eight people alone [Tibetan Fox] The salary is not low but it is definitely not the same as the workload
It is easy to find a job with a teacher training degree, and you can go to a private school.
Making short videos for companies requires all the follow-up work, so why not try the entire self-media yourself?
My roommate was looking for a job. The HR interviewed him and said that the base salary was 4k but he would have to work overtime three times a week. If necessary, he could get more. My roommate said ok. How would the overtime pay be calculated? The HR said it would be included in the base salary. I didn't expect this to exist before graduation [smile]
My company…a new colleague asked me what I do! I told him I do odd jobs! Everything has to do with me! Including helping the boss’s wife pick up parcels…helping the boss wash the car! Even if they don’t know how to use their computers, I have to take care of them! The salary is not high and there is no overtime pay…I will be deducted if I ask for leave! They also said that they would increase my …
I cried after reading this. I haven't graduated yet and I haven't faced the problem of employment. Why is it so difficult for ordinary people to find a job that can support themselves and live a good life without pain? Come on, sister. We will all live the good life we want.
This is not called a small company giving up, this is called oversupply. There are too many graduates, too many people who can do this job, so they all want to lower the cost of employing people.
was laid off that year, and then I went back to my hometown to look for a job. All of them wanted to pay me a salary and let me do front-end mobile and back-end work, or I would have one day off a week. They clearly said there was no overtime pay for overtime work, so I finally changed my career.
I guess you're probably going to a job you don't like.
After I was laid off at the beginning of last year, I returned to my hometown and changed several jobs but couldn't settle down. Sigh... I worked overtime seven days a week in a small company, voluntarily, because it involved the collection application process. There were too many things that were not completed before the previous employee left. I thought that if I worked hard to catch up, it wou…
My sister thinks that he is from a big company. Hahahaha. I am a liberal arts graduate looking for a job. I clearly applied for two positions, administration and personnel. I don’t know how many companies require me to do both. Some companies also require me to do finance as well [藏狐] It’s equivalent to 3,000 yuan and he wants to hire three people [blame me]
Small companies will try to save as much as possible in other departments except production and sales. It is best if one person is responsible for all the work. Unless they feel that increasing investment in this department can really bring more substantial benefits to the company, it will continue to be like this.
Stop looking for a job and marry me
Small companies have a lot of problems, most of which come from the leaders. As for your own work content, it is actually not that complicated, and the internal friction is particularly serious.
Every time when I think there is something wrong with my work, I always watch videos or see my friends’ work experience telling me that my work is already very good, so am I asking too much? [Kneeling]
Help, this happened to me when I was interviewing for a company before. The job content they described to me was the same as the job content of my previous department.
MD, I am also an editor. I have been looking for a job these days, just like up... But I haven't found a suitable one yet...
21st-class non-key university graduate, worked as an operations assistant in a listed home furnishing company for 8 months and resigned. Due to the epidemic and the Chinese New Year + other reasons, I stayed for almost half a year. Now I am looking for a job in March. No one wants me in campus recruitment (not a 22nd-class graduate), and no one wants me in social recruitment without experience. I…
We are the same, it is just a store. At the end of last year, the boss suddenly wanted to do Douyin or something. The boss has a friend who does Douyin training. At the end of last year, he said that if I paid money, I could take one more person to the class, and asked me to go. I talked to him for a while, and the boss said that the purpose was to attract customers from short videos to the store…
And now I am afraid of being beaten when looking for a job
[tv_笑泣] Let me tell you the path I am taking now. After graduation, I will find a job like Tik Tok operation, preferably live broadcast operation or short video graphic operation. The salary does not matter, as long as I can survive. Then I will study hard for two or three months, and when I have made some achievements, I can ask my boss to resign and find the next job. As long as you study hard,…
A round face means seven points of wealth. Even if you are not rich, you can protect your home. I hope that up and my friends can find a job that they can accept as much as possible [mask]
Our small company is also laying off employees, and those who remain have to work in other positions and increase their hours...
Start your own company, then you will have a job.
I can't give you any advice, but I hope you can find a job you like. There will definitely be a way forward for you. Come on, sister! !
Big companies have started to lay off employees, how can small companies still have a good life? What's more, big companies are also starting to rot. It is really not easy to have a job. The financial crisis has come. Let's just make sure we have enough food and clothing first.
This kind of company wants one person to do the work of a team, and says that this position has just started (a newly established department), which proves that your position is a trial operation, not a long-term one, and is dispensable. This kind of company just wants to do video live streaming to sell goods (test the waters), and if it fails, they can just lay off a few people. Your position is…
I work in the small company you mentioned. I am now a team by myself. It is cheap and easy to use.
Employees are angels when they work hard, but they are definitely not demons when they receive their wages. - by top gear China Special Slogan of a door-making company in Chengdu
Can you not go to work? I will support you [Funny]
The most annoying thing is that everything is fine during the negotiation and there will be no problem after getting a job, but after a long time, one person gradually has to take on multiple roles. If you want to quit, there are not many jobs in the same industry locally and they are basically all taken.
After graduating in 2019, I entered a large company and worked diligently for a year and a half before being hospitalized for two months. Now I am living in a small place and working as a salary thief. Money is not as important as health [doge]
I got an ordinary undergraduate degree and a master's degree in economics from the University of Tokyo. I don't have any valuable internship experience. I'm about to graduate and I'm worried about finding a job. I feel that everyone has a good academic background now, and economics is very theoretical, like a panacea. I don't know what direction to go in my future job search. I'm worried.
I just found a job recently. 5 days and 8 hours, 5400 basic salary + 2400 performance bonus. Currently 6400 in probation period. 13th to 16th salary. Legal holidays are normal. Anyway, job hunting is just like that, just don't overwork yourself, after all, it's really impossible to make money.
I am a fresh graduate and will graduate in June this year. I am looking for an internship. I am also anxious and cannot find a suitable one.
Too real, same profession, same job search experience
Finding a suitable job is like finding someone to marry. Just as difficult, just as weird, just as heartbreaking and troublesome.
Regardless of the size of the company, it has become a common phenomenon that the salary and benefits do not match the workload, and everyone has a do-it-or-leave-it attitude, because there will always be someone to do it [grievance]
I was also looking for a job recently and found that most of the original headhunters have switched to third-party [eye-catching]. Big companies don’t recruit regular employees. A direct recruitment quota for a civilian position is very fierce. There are third-party outsourcing everywhere [laughing and crying]. The treatment of outsourcing is nothing. In addition, the positions that are still rec…
Damn, big data is really scary. Bilibili can find out that I want to find a job so quickly [Out-of-body experience]
Can you give me some advice? I just graduated with a master's degree and now have two jobs in front of me. One is in a county-level city, a research institute (public institution) with no establishment and no provident fund, with eight hours off on weekends, and work in the fields. The salary is 10,000+ yuan after being converted to a regular employee, and a housing allowance of 200,000 yuan will…
These companies that make Douyin want to reduce labor costs, because funds can be used in many places, such as supply, channels, warehouses, etc. This is e-commerce, and the cost is very high. If you only make a video account, you will not make money if you don’t become popular in the early stage without business orders. Moreover, these people only see that the top video bloggers can make money, …
Hello up, I think what you said is right, but I have been thinking about it recently, because I am now working in a company I don’t like, doing a job where I can’t find a sense of existence and value. I can’t deceive myself into accepting the status quo, and I envy those who are enthusiastic and can enter the company and work happily every day. I know what kind of life I want, but I feel that I c…
How should I put it? It's not because I do a job I don't like and wait for opportunities to earn money... rent or something like that.
I looked for a job for two days and gave up. I'll just stay at home and write novels. I can earn some money as a full-time worker. [doge]
I'm so upset about finding a job [laughing and crying]
I'm looking for a job in Hangzhou now, for programming. I can't find one in a big company, and small companies pay too little (3-4k), and have too many requirements. It's really like what the up said, small companies almost use their small company status as a bargaining chip, because I'm in a small company, so I deserve a low salary, because I'm in a small company, so of course I have to do more …
After enjoying the dividends of the times, I no longer look down on low-paying jobs
I am also preparing to look for a job [spicy eyes]
Why work?
When I heard this kind of news before, I thought it was a problem between the employees and the company, but then I started working and changed jobs three times a year and still couldn't make it to the end of the year, so I realized how difficult it was. Alas, I am a college student and I don't even make half of what my brother earns from working part-time. I am so upset.
After watching your video, I feel lucky that I finally chose the job at the research institute, because I got an offer from a large Internet company with an annual salary of nearly 500,000 yuan during the spring recruitment, as well as an offer from the research institute. Although the salary is not as high as that of a large company, it is more stable and I don’t have to worry about the last-pla…
As an intern, it feels like I'm being given the job for free. What's even more outrageous is that they look down on your academic qualifications and lack of experience. I really want to say, when recruiting people, don't the company HR check it yourself? You must be blind. You keep urging me to complete the work all day long. I quit. You can do it yourself.
I'm looking for a job. The epidemic in Shanghai is recurring now, and the overall environment is also quite bad. The market is sluggish, consumption is slowing down, young people are giving up, companies are giving up, and the market is giving up... I'm quite confused.
There is another way, you can just give up, why bother looking for a job?
Capital excludes labor [dumb] so high-paying jobs actually don’t require much work
have interviewed for a lot of jobs recently. Since they are technical positions, it is easy for me to find a job as long as I have work experience and don’t have high requirements. In many ways, finding a job depends on luck. You must have a thorough discussion before going for the on-site re-interview, otherwise it is a waste of time! I went to the first few interviews in person, and later I ask…
majored in automobiles and have worked abroad. This year, I found a job in a foreign company and was hired by the product department. I was the only fresh graduate in the department, and the others were all experienced employees with many years of work experience. Even another new employee was a graduate student with many years of work experience. I really don’t know why I was chosen. The job ben…
It is very difficult to work in the system during the epidemic. I have to work 14+7 [eat melon]
In fact, the main purpose is to make a lot of money, and I want to get 20k as soon as I get the job. However, as a recruiter, your experience is your reason, but your ability can only be seen as a basic condition during the interview. It really takes a period of observation to show your work ability. You can also find out by looking at the company's prospects and earning less. I'm now in the ente…
Our company is located in Suzhou. It is a small studio. We are currently recruiting partners to work in the supply chain. I dare not say anything else. Our company advocates that you do what you are good at. The colleagues are relatively young and the working atmosphere is very good. Friends who are interested can contact me privately.
Don't go to a company or job you don't like. If you go, you'll leave anyway, so it's better not to go in the first place.
used to work in a Taiwanese company with more than 200 people, and I was responsible for several projects by myself [eye-opening]. I was in charge of the entire project [eye-opening]. From the beginning of communicating with customers about the preliminary quality documents of the product to receiving customers, to witnessing the products in the middle, to shipping, to making documents, it was al…
I have a master's degree in clinical medicine, but I can't find a job. I went to do regular training and I am so anxious.
C, I think the same as the above. It's so hard to find a job after applying for jobs all over the world. No one has changed their careers. Four years of work experience in the industry is equivalent to nothing. They would rather give low wages and train themselves. The job I quit before had less salary, less work, two days off, good benefits, no overtime, and a time to leave. Now I have to ask fo…
Come on everyone! I hope everyone can find a job they like and keep doing it for a long time. I also interviewed two or three companies today. I was really tired when I got home. Each interview lasted one or two hours.
It's better to go home and farm. Work is too demanding.
Nowadays, many jobs require a lot of work and the salary is very low.
haven't been on B-World much these two days, and today I saw this video, and I feel emotional. I worked in a small company for more than a year, and the boss wanted us to be on call at any time. We finally had a rest on weekends, but he bombarded us with WeChat messages saying that this promotion and that promotion would not be released. My mood was ruined early in the morning. My colleagues who …
am about to graduate from college, I spent an hour in the comment section and saved this video. It will help me find a job after graduation!
It is best to work in a large company. If you have a career plan, it is best to take a listed company as your bottom line. At least sometimes you will look better. ��, based on three years of work experience
Same job. Also got laid off before the Spring Festival, then started looking for a job in the spring. Interviews were boring. Also met some outrageous companies. [Great] Then I gave up and just found a random company to join, and it seems to be pretty good so far.
The epidemic is coming again, and the company is more demanding. What should I do? Quit and change jobs or continue to work?
haven't worked for more than a year. Since the outbreak of the epidemic, many jobs are no longer recruiting, especially in third-tier small cities where the demand for talent is low. The biggest demand is still in factories. They need people every month, but no one wants to go. As for the reason, many people know it. I have at least dozens of interviews a year. Except for the 58.com I used in the…
Oh, may I ask the uploader, I am a student of the Department of Mechanical Manufacturing, and I have a master's degree from China Agricultural University. Will it be difficult to find a job?
started a business in a media company, and then I went to interview at a decoration company, they wanted to do their own media. It was exactly the same as what you said, a new department, going into the Internet short video industry. Then they asked me if I could do script writing, copy editing, account operation, filming, editing, post-production, etc. I fucking knew I could do it, but is this a…
don't know if mine is considered a small company, but a big one, but it's a real estate company of Moubi. I applied for a job in this property. The monthly salary in a fourth-tier city is about 4k. After working for three months, I still don't understand which system I belong to. I originally applied for a monitor and clerk, but later I became a monitor, clerk and security guard, which are the th…
My job is the same. Being responsible for the company's bidding and tendering work is very tiring. Being responsible for the project landscaping design is also very tiring. Before, I was also responsible for network operations, which was very numb.
You can do it if you want, but when you can't find a job you'll panic and look down on other people's small companies, right? 1.4 billion people can't find a replacement for you?
I'm looking for a job that requires copywriting, editing, graphics and operation. Isn't this a job for four people? The most important thing is that the salary is enough to feed the beggars. If you don't have experience in operating Douyin, then bye bye!
I am in this state now. [Laughing and crying][Laughing and crying] One person does the work of a department. There is no other way. The epidemic can only make you look for a job.
Where to find a job
It is true. It is getting harder and harder. Before, if you couldn't find a job in China, you could go to the US or Europe to wash dishes. Now, all the jobs of washing dishes have been taken by South Americans.
I don't know if there are too many job opportunities in Shenzhen or if my requirements are low (two days off a week, around 7,000 after tax, little overtime), but there are still many jobs available.
It's true. I've been looking for a copywriting job recently, but every company I interviewed basically requires me to be able to write copywriting, video scripts, shoot, and post-production. If I want to earn money by listing my products on the platform, I also need to be able to write Taobao copywriting and do some poster editing. The work I do and the areas I worked in before are not consistent…
don't have many ideas now. I just want to find an administrative job with two days off a week. The salary doesn't matter... If I keep adding more like this, I feel like my mental state will be affected [eye-irritating]
I work in a small company, and my only feeling is that the boss must be rich! Must be rich! Must be rich!!! Otherwise, it's not just one person doing the work of multiple positions, but even basic holiday benefits cannot be guaranteed, which is heartbreaking [eye-opening] Our previous boss was very rich, and the holiday benefits were very good. Later, we changed to an investor boss. Wow, the coup…
There are so many things to do. It's good to find a job. Waiting for your good news
It's also related to the job content. We can't recruit people for chemical-related jobs here [laughing and crying] Large companies, listed companies, the salary is not low
Any recommendations for jobs with eight hours of weekends off? Low wages don't matter. [Speechless]
I now doubt whether it was the right choice for me to take the popular non-key postgraduate examination for our rural commercial bank because I did not prepare well for it. Our rural commercial bank in a small city on the 18th tier works six days a week and rests one day. You have to arrive before 8 o'clock every day and leave at 5:30, but the benefits are very good. After becoming a regular empl…
Keep looking. Nothing. I quit my job in February. I found a job in early March. Now all industries are in a state of panic.
My friend originally thought that working in a big company was too tiring and wanted to find a job that was easier with less pay. As a result, he went to work overtime in small companies, and had to do all kinds of chores. His salary was reduced by two-thirds. He went to several small companies and the situation was similar. There were even cases where the bosses ran away without paying wages. In…
[Goodbye] I have become the person I hate the most. I work hard and start to roll up my sleeves just to get a promotion and have some achievements at work.
When I talk about this, I think of a legendary friend of mine. Before, when he was looking for a job, the company had a lot of requirements and was not very kind. However, his personal performance was extremely outstanding and his character was also very good. The boss was not very kind at first, but later he annoyed all the people in a department and left, leaving only my friend. In the end, he …
After reading the comments, I actually feel that I am lucky enough. I am a slacker who has nothing, only a high school education (dropped out of college), and three years of work experience, and I can still get 10k [eye-catching] Although people of the same age around me are taller than me... I can't even say it [laughing and crying] I just hope I can survive the crisis and not be laid off [laugh…
Can any sisters tell me which is better, it may take a long time to find a job or go to Heilongjiang for ordinary selection (basically you will be in the township later) [laughing and crying]
I got a job as a transfer student last time, and I got 4k. During the interview, I was told that I needed to change my student mentality. I have already resigned, and this salary is not worth it for me.
I worked overtime for more than 30 hours and just woke up to see this. It's really hard to find a good job.
I have been looking for a job for more than a week [呆][呆]
I don't have this kind of anxiety about finding a job or a company, because I am self-employed. I am my own boss yyds.
[doge] Ready, hope to have a good job
But our company wanted to recruit people before, and it was very difficult. The salary is not high, so we welcome newcomers, but they need to have strong learning ability and adaptability. Only one out of a dozen people meets the requirements. It’s not based on academic qualifications, but those with higher academic qualifications are more likely to get started quickly at work [laughing and cryin…
I am also anxious about finding a job [doge][doge][doge]
These companies are so funny. If one person can handle the work of a department by himself, why bother looking for a job? Wouldn't it be better to start your own company?
I'm thinking of changing jobs recently. I read this and suddenly feel that my current job is pretty good. The boss is open-minded. Although there is no two days off, there is one and a half days off. The salary doesn't seem to be bad either.
I have no experience in looking for a job, I just want to know if it is possible to sign a job first and then look for another one?
It's like this. Now when I go out to look for a job, I see on the app that basically all of them require one person to do the shooting, script, editing, special effects, operation, and stage management. It would be best if you have good looks and can go abroad. The monthly salary is 4,000 to 5,000 yuan. It's up to you to do it.
At first, my wife complained that I didn’t have enough money because I had flexible working hours. Later, she found a job with a high salary but no holidays and complained that I didn’t accompany her anymore. . .
You can work and find a job at the same time
I am 25 years old this year and have been working as a game UI designer in Chengdu for almost 4 years. My current salary is 10k or more
applied for an online lecturer position a while ago. The sister who applied with me was very outstanding. I added her WeChat before leaving. But in the end, I got the job and the sister didn’t. I guess the reason was that the sister was married and was about to have a child. In addition, the salary of the sister in her previous job was very high, and they could not meet her salary expectations.
Be bold. Since you have to do all the work in a small company, you might as well go it alone and start your own business.
A junior in the last 211 university who is an electrical engineer. I am not going to take the postgraduate entrance exam. I will join the factory in the autumn recruitment and prepare for the social torture. I want to engage in electrical design, relay protection, and electronic device work internship. I expect a salary of around 6,000. Brothers, is this reasonable? [doge]
It is like this. The biggest difference between the work content of large companies and small companies is that the work responsibilities of large companies are clearly divided. You are responsible for a certain module. In small companies, I don’t need you to be very good at a certain module, but I need you to know something about related things. Also, if the project of the large company is layin…
What job to look for? Find a husband
For example, I am a chef. If I run a big store, I am only responsible for cooking. If I run a small store, deep-frying, stewing fish and cooking are all my jobs. I resigned not long ago. There were a lot of job openings after the New Year, but the epidemic came again. All the job openings disappeared overnight. Many friends' stores were closed for the holiday... What the hell...
The following words are harsh! It seems that the UP host has never been beaten by the society. Small enterprises have always been like this. I resigned from a large company in 2012 and joined a small company. It was already like this at that time! And everyone knows that small private enterprises are tired. Why do I feel that the UP host has been living in a dream? ! It is very normal for one per…
still looked for a job. I looked for more than half a year. Fortunately, my wife supported me and I found a job as a programmer in the operations department of a 965 university [laughing and crying]
Suddenly I feel lucky. During this period, I found a job less than one kilometer away from home, with two days off a week, and a salary 4k more than before... I also do video post-production, product videos for e-commerce.
You are much better off than me. You can get compensation when you are laid off, but I can only go through arbitration. More than a month has passed and I still haven't found a job.
[Smile] I am also a video editor, I have been working for more than 4 years and the situation is the same. I have started to give up and go back to work.
I haven’t found a job yet [cry][cry][cry][cry][cry][cry]
B Station saw that I failed the postgraduate entrance examination and had no internship experience and was looking for a job [crying]
After graduation, I first worked in a small organization and later in a larger company. I have to say, the contrast is really obvious. The relationship between employees and bosses in small organizations is like a zero-sum game. The profit is there, and if you get more, I will earn less, so they exploit you like crazy. Larger organizations are much better. Everyone has their own work, earns their…
Keep looking. It's even harder to do a job you don't like.
Directly set up a studio and turn it into a small company
Why do people push videos about job hunting to me when graduation season is almost here [laughing and crying]
It's true. I'm looking for a job now. Many companies not only pay little but also have a lot of work. One person has to do the work of a team [covering face]
Just like when I was interviewing an illustrator, he asked me if I knew graphic design. Wuhu, I asked tentatively if the company was hiring illustrators and graphic designers, and how the company's design department and illustration department cooperated. Later he said directly that it was actually one department. I asked how many people there were, and he said one, Wuhu Wuhu, and then asked abou…
think this kind of video is necessary, at least it will make a few people firm up their faith and not give small companies a chance to play bad. The storm will eventually pass. If those who are looking for jobs can't survive, it doesn't mean that the small companies that play bad can survive. If you think about this question, what will you do if the small company that plays bad suddenly goes bank…
Don't go. Finding a job is like finding a man. Better to be alone than to be with someone you don't like! It's easy for a small company to fail.
Our company is also a small one, and we are doing OK. When looking for a job, it depends on luck. [Amazing]
haven't found a job for two months. My choice is to wait. I like this company very much. My boss is very good and is also cultivating my skills. I support continuing to wait. A large company has a good platform and relatively good treatment. Small companies are unstable and no one knows them. They can't afford to pay wages and one person has to do the work of several people. If you don't lack ski…
I have an interview coming up. I hope to find a suitable job and work there for a few years in peace and stability. [Blush]
I feel like I saw myself. I received compensation at the beginning of the year and am still looking for a job. It’s also a video post-production.
Work is given by others, only what you own is yours.
I suggest you look for another job. If you work in a place you don't like, you will find everything bad. You will not feel like working from morning to afternoon, which will affect your mood and work efficiency. . . . Also, where is the uploader from? You look so cute. I want to pinch your face. Hehe [脱单doge]
interviewed for the same thing for half a month. The video industry is so competitive. I never thought that I could not find a job that only requires post-production.
I was just fired too. Woohoo, I'm also looking for a job. Due to the epidemic, life in Shanghai is so difficult right now.
I feel the same! I have been looking for a job for half a month [grievance]
Why do I feel like the work has already started but I still don’t like it? [doge]
It's very real. As a colleague, I feel anxious in the job hunting environment now. I have been looking for a job for a month and I feel numb. It is also difficult to find a job that I like. It is really not easy for workers.
It's okay to get a lower salary for a job you like, but it's like being in prison every day if you do something you don't like.
Small companies have always been like this. Small and beautiful is basically an imagination. Generally, small companies have a chaotic structure, the work changes every day, it is disorganized, and the salary is not high. The only good thing may be that there is no fierce competition in big companies, and there are more Buddhists.
Fairies, keep looking until you find a job that meets your expectations. It may take some time, but it is better than making do with it. If you choose a company that you don't like at the beginning, it will be too painful. And if you work in a company you don't like, you will not be able to persist for a while and will choose to change jobs. So I hope you don't wrong yourself. I can see that you …
Small companies are like this. It's normal [Cat2_Watching!] I envy those who have worked in big companies.
How should I put it? We are a small company in a small city, and the departments are divided into independent subsidiaries according to new plans. So, as a designer, I not only have to design and draw, but also write plans, do project docking, and do new media operation and promotion... And I seem to have gradually gotten used to it. I don’t want to express any opinions. I just happened to see th…
returned to my hometown, a small third- or fourth-tier city. It's so hard to find a post-production job. I have to shoot videos and product photos in the early stage, edit scripts and create copywriting in the later stage, and also operate public accounts and do PS. In the end, you can work overtime and get a pension. I accepted all of this because there is really no suitable one. If I don't acce…
If you work in a small company, you will definitely not work overtime. They almost never pay overtime. To put it nicely, you have to apply for overtime, but it may not be approved. They will say that it is because you did not finish your work during the day, not because of a sudden task from the company, so you do not work overtime.
I'm looking for a job and I'm so scared [eye-sore]
There is no happiness in work, and happiness is not in work
I just like this real feeling. You have to like your job, otherwise it will be torture.
am currently looking for an internship as a junior. I am curious about the source of the saying "many people were laid off by large companies at the end of last year and the beginning of this year". As a student, I really want to know how to understand this industry trend. [Blessings] I hope you can find a job you like! !
Your salary may not meet my expectations, but I cannot guarantee that my work efficiency and attitude will meet your boss's expectations.
I hope the up master can be firm in his heart, have confidence in his ability, and stick to it. Good work requires patience and good luck. If the market is not good, you can try to create an account and do it yourself!!!
I found a job in Shanghai with a part-time job. I don't really want to go, but I'm worried that I won't be able to find a job because of the epidemic. I'm worried about delaying my job opening and staying at home.
This time it's less than two weeks, why rush? There will definitely be good jobs later.
The situation is similar. I am also in the Internet industry. I have been looking for a job for the past 4 months. It’s not that I can’t get a high-level job or a low-level job. It’s just that after working for many years, I have become more cautious. Only a good job that suits my development can be considered.
branch or wholly owned subsidiary of a large company is like finding a tall man among short men. Don't think about small companies, they are all private companies, and the boss will only want you to add bricks and tiles to his villa. At least the salary, personnel structure, and promotion channels of a large company are clearly written, but small companies don't have this. Don't consider small co…
Every sentence is what I want to say when I am looking for a job.
My previous job was in a small factory. I was required to know CAD, three-dimensional drawing, and be able to read assembly drawings. The salary was 2,500 yuan, yes, and the internship salary was 2,000 yuan. I worked there for three months.
I quit my job on February 20th and rented a car to go out for a week. I have been looking for a job in Wuhan intermittently these days since I came back. As a result, I just saw that it takes 14 days to be quarantined from Shanghai to Wuhan this afternoon. I really don’t know where to vent my anger
Keep looking, unless you have no other choice, otherwise work is like being in prison [OK]
It's so real. I had the same situation at the beginning of the year. In the end, because of the car and house loan, I had to give in and work as soon as possible. I dare not delay and choose [laughing and crying]
Tencent, my body can't take it anymore, I have no desire to work at such a young age, I just want to lie down
I get paid for one job, but if I have to do two jobs, I have to pay two.
The online store here has a 10-hour workday. [Blame me] I'm tired, I don't want to do it anymore, there's too much work, and no money, and he's still talking to you about love, talking about your mother
I was also laid off. Due to the epidemic in Shanghai, I couldn't find a job. I just sent it in.
It is easy to go from frugality to luxury, but it is difficult to go from luxury to frugality. Finding a job depends on luck, skills, and connections. To put it bluntly, you don’t have skills. If you have skills and certificates, you are not afraid of going anywhere.
Go to a company you don't like and find a job you like more. I've always done this, taking two or three months' salary and leaving immediately after finding a new job.
Your canine teeth hurt my heart when I see them [eye-irritating] It's easy to find a job here, they're all small private companies [rolling eyes]
It depends on the region. I work in several Internet companies in Fuzhou. Although the salary is not as high as other places, there is no overtime and it is easy and comfortable.
Seeing that you have 888 followers, I will no longer follow you. I hope this number is a good omen for you. I'll throw in two coins to show my appreciation. The reality is indeed as cruel as you said. Last year, my girlfriend couldn't find a job she liked despite having a good resume, and ended up working for a small company. The market environment is too bad now. I hope you can find a job you li…
Don't mention it. I have been basically in the game industry for the past two or three years during my graduation internship. I went to three game companies. The first one was a completely reskinned game from its establishment to its bankruptcy. It made money for a year and then the company collapsed. It was still 2018-2019 at that time, and the money was so easy to make. After the epidemic, I we…
It’s really hard to find a job this year.
I just graduated and I'm looking for a job, come on sister [haha]
When is it harder to find a job than to find a partner? When is it time to flip the table? [tv_doge]
I have seen a job where you get two days off a week. They tell you you get two days off, but then you work overtime until 8 or 9 every day, and then you work overtime a week to make up for the two days off. This operation is amazing.
Small companies are like this, one person does more work, the salary is low, and many times their rules and regulations are not perfect, sometimes they will ask you to do things outside of work.
Let me put it this way. Last year I was collecting couriers and made 150 yuan a day. I started working at noon and worked until 10 o'clock at night. I had no benefits and even no rest time. I was so tired. The newly graduated high school students started to compete internally. They only wanted 140 a day. They came for 5 days and they knew the way. Then I was unemployed.
As a job seeker on Tianya, I can fully understand your feeling. Nowadays, most companies like to lie flat. The management is mentally lazy and expects their subordinates to do everything. I am a technician and have to do administrative work for the boss. Haha. Forget it. I wish you all the best and hope you find a good job soon.
have met a more speechless company. It is a logistics company under a state-owned enterprise. The recruitment conditions for warehouse managers are under 50 years old and knowing 26 letters. The working hours are from 8 am to 5 pm, the salary is 3,000-5,000 yuan, there are benefits during the Chinese New Year and other holidays, as well as year-end bonuses, transportation and lunch. When I saw th…
It's like this in a small company. In a large company, the scope of work of one person is covered by multiple people. It's not a slacking job, it's always like this. The workload and requirements of a small company are also much smaller than those of a large company. Large companies have many rules and regulations. What they want is that when you leave, I have the next person who can quickly repl…
There is no way. The education level of the population has generally improved, but there are only so many jobs. Even if there are new industries and new opportunities, they are very few and the demand cannot meet the supply.
Now, finding a 965 job with overtime pay should be more difficult than taking the civil service exam [脱单doge]
Alas, I am also in the same industry. I work in 3D dynamics, which is related to product advertising. I went back to Shandong to find a job some time ago. The experience is almost the same as the above. It is really outrageous.
Help me, I am so dumbfounded. The current employment environment is so difficult [eye-irritating] I suddenly feel that my study is meaningless. No matter how many years I study, I will still be unemployed and I will still be unable to survive.
I don't want to run around anymore because the epidemic is so serious. I found a job in my hometown and now I am working steadily and lying down.
So I took the postgraduate entrance examination because I really didn't want to go out to work. The postgraduate entrance examination was not for those who just wanted to get a degree. Only those who took the entrance examinations of Tsinghua University, Peking University, and Fudan University could have a bright future. I failed the second attempt and then took the third attempt [to Xinxin]
The people working on the construction sites are suffering now. They were laid off before the New Year and still can't find a job. The supply is less than the demand. Now the real estate industry is really a sunset industry [eye-catching]
It is common for one person to work multiple jobs in a small company.
Boss, you have these abilities, so you don't need to look for a job, you need to find a joint venture partner. Build a team yourself.
I'm having trouble finding a job.
One thing I have to say is that it is normal to look for a job with a pay cut now, and it is difficult not to have a pay cut.
You just ask, it doesn’t matter if the workload is heavy or the pay is low, does your small company give shares?
In such a market environment, does it mean that ideal jobs do not exist?
It is common for one person to do multiple tasks in a small company. The workload for each task is small, but the variety is indispensable. So, for a small company like mine, I have to do everything from testing to art to copywriting, but I still slack off at work all day. There is too little work, and the company will definitely not be happy to hire 4 or 5 people for this kind of work, after all…
I have the same skills as up. I haven't even started looking for a job yet, but I'm already panicking.
Where are you from in UP? Where can you find a job?
I graduated from a non-key undergraduate program in Shandong in 2016, but I realized after the college entrance examination that I was just an ordinary person, with poor learning ability and no family background. My first job after graduation was as a construction site supervisor with an internship salary of 1,600 yuan, but I quit after three months. My second job was a labor dispatch job in a ce…
Large companies are relatively more fair in personal development, and everyone gets what they are capable of. Family businesses are the worst to enter, because family background determines that some people don't have to do the corresponding work and get the corresponding salary. Outsiders do most of the work but still can't get a higher salary. People are like flowing water, and it's okay to spen…
It's okay, just follow suit and take some orders. As long as you don't starve to death, you can find a job slowly.
I don't want to follow the path others tell me to take. Everyone says that the only goal of life is to make money, buy a house and a car. But I don't like these things. I don't like the hustle and bustle. The city outside is too cold. I have worked all my life and dedicated my life to money. On sunny days, I sit in the factory and waste time. No one gets rich by saving money.
[Laughing and crying] When I was looking for a job last month, I felt that many companies rarely had breaks and worked overtime a lot. If your commute time is too long, they will ask you to move directly. A lot of companies accept off-get off work with four days off a month.
I work in a small company that makes games. To be honest, big companies have started to lay off employees and cut projects, not to mention small companies. It's really stressful. Because of the nature of my work, I can see the company's accounts and it's barely enough to cover expenses. Salaries are low, and there's really no way to do multiple jobs. Maybe we can just get through this Internet wi…
There is no reason. In fact, they just use various reasons to suppress the salary. When I was looking for a job before the New Year, young age = less work experience, old age = lack of energy and can't fight, less work = too narrow technical scope, more work = not in-depth research, in short, there is a reason not to pay
I don't know if I should say this, I found a job in 3 days after I submitted my resume, one year of game work experience, a modeler [kneeling], located in Guangzhou
I feel that the job search environment has been very severe since the outbreak [eye-catching]
I'm a designer. When I was an intern in college, I went to a small third-party company. Although the company was small, the work content was divided very clearly. I only did graphic design. Later, I felt that the development was not good, so I resigned. During the job search, I was cheated by a media company. I applied for labor arbitration, and I haven't received my salary yet [it's so annoying]…
What a coincidence! I am a film and television post-production worker. My job is exactly the same as what you said. I don’t know what to do.
Doing a job that you don't like or dislike... This is simply the norm in life, just like not winning the lottery. So, pick a job that you are not so resistant to and make do with it until the overall environment gets better.
[Eating melon seeds] Compared to work, a partner is more reliable [乃琳Queen_MUA!]
Insist on lying down. Now I work from 9 to 5, with 5 days off and 2 hours lunch break. The income is not high, but the working environment is good, and there are few and nice colleagues.
Is it the average salary of local people in a small company that is proportional, or is it the job that is several times higher than the median salary in a large company that is proportional? I think the salary of the job that can be found is proportional.
Up still has experience in big companies. For people like me who have only worked in small companies during this period of time, when looking for a job, they will still ask you to come for an interview and then go through the motions.
I think I have a lot of work to do. Am I really that tired?
I work hard and work overtime, but in return my boss gives me bigger and bigger houses and more expensive cars. This prosperous city seems to have nothing to do with me, but I am struggling here again [speechless]
Internet companies have enjoyed the dividends of rapid development for more than ten or twenty years. Now the development is slowing down, so it is inevitable to slow down the expansion. However, newcomers continue to squeeze into this industry, so Internet companies can always have newcomers with lower salaries. There is a large labor gap in traditional industries, but the salary is much lower t…
I would rather work for a big company. Small companies are really small and full of evil. [Sad] When will the epidemic end? It's really hard to find a job.
[2233娘_汗] Most of the so-called game companies in China...are just making money by changing their names. Only large companies and independent studios are serious game companies in my opinion.
I'm also looking for a job
Why did I see this video? I'm already lying down and not looking for a job.
Both are fine. You can learn more personal skills in a small company, and you can learn experience and get qualifications in a large company. It is difficult to find a job now. Find a job and then see if the next one will be better. Sometimes, some employers will be more generous when they see that you are working in another company. If they know that you are unemployed, they will be more casual …
I'm also numb [eye-sore] I just need a job that's not too stressful
This is what I think. From a practical perspective, if your income is tight and you need to find a job that gives you a sense of security, it's not bad to work in a small company. You can still change jobs if it really doesn't work out. But if you can't find a job, you should still look for another one.
Work hard and find a job with less pressure first. There is no need to do one with high pressure.
I woke up at 11 this morning and read the chat logs in the work group. Everyone was studying in the library [laughing and crying]. I was instantly upset.
What I understand by involution is this: in competition, some people increase their costs in order to obtain more resources, forcing others to also increase their costs to ensure that they can obtain certain resources. I think this fits the image of the word "involution", forcing people to continuously increase their costs and roll deeper, and those who do not roll will be excluded. Involution re…
Why are you always cutting pictures recently? Aren't you tired [脱单doge] Isn't this just adding to your workload [呲牙]
must be the first one to sit at my workstation in the morning. When my colleagues come, I must greet them with a smile: You just got here! When my colleagues called me to eat at noon, I would reply directly: I haven’t finished my work yet, you go first. I never take a nap after lunch, I must type code, and I use a mechanical keyboard. The sound of the keyboard is like an alarm bell, which is deaf…
It's a pity that in today's society, if you don't work hard, you will be forced to work hard. In order to find a job, you can only work hard to practice questions and memorize clichés. But there are always people who are better at practicing questions and memorizing clichés than you. So you can only spend more time and effort. But there are always people who are better than you. In the end, every…
No matter if you are rolling or not, I am lying flat anyway. People living in big cities will not starve to death easily, and they don’t ask for high-paying jobs, they just want an easy life.
When you are looking for a job, you will know the benefits of involution.
Hard work does not equal involution. I feel that the current involution trend is who works harder... Although we are in society, we must also consider ourselves. Self-improvement is necessary. For example, if I am taking the college entrance examination or postgraduate entrance examination, hard work is very, very necessary. But if I am a working party now, and I see who is ineffective and works …
Refuse to be involuted, start with me. Refuse to study, start with the score. Refuse to work, start with the salary. [Hot eyes][Hot eyes][Hot eyes]
My friends, some people sleep very little and are full of energy, so they can work efficiently.
When you are at the age when you should work hard, your income will be several times higher than those who don’t work hard when they should. Houses and cars will not be a problem in the future. For those of us who started working before graduating from junior high school, we will only get a monthly salary of several thousand yuan in our lifetime. There is no medicine for regret [sour]
When I was in my senior year of high school, I was also a person who raced against time. But since the head teacher asked our dormitory to be slaughtered chickens and take on all the class duty activities, my mentality has collapsed a bit. Coupled with my dissatisfaction with the school (the teaching materials and training programs of the intensive class are too different from ours), my grades du…
<p>Perhaps candidates in Guangdong can accept a junior college degree. If junior colleges are included, the admission rate of high school students to university is more than 80%. In Guangdong, it is also easy to find a job with a junior college degree, and many places are willing to accept them. </p>
For work, 996 is really child's play, it's just been disclosed.
The main reason is that high school students are still growing. Long-term sleep deprivation + poor diet + high-intensity mental work will generally stop a person's growth and development, but will not kill them immediately. When they reach working age, their development has stopped, and doing this is directly murder for money.
Most Henan people should be forced to go to technical colleges and do low-end jobs to make a living. Looking at Henan's high population ratio, there is not a single good school. It's a tragedy.
Compared to this, 996 is indeed a blessing. Not only are the working hours relatively short, but the income is also significantly higher than that of ordinary people.
Yes, they complain about the distance to school and complain about working 996. They don't even look at their teachers.
You don't understand what I mean by meaning. You spent more time<br> What is the actual meaning? Did these 100 points boost GDP or improve scientific research? Or did they provide jobs for social creativity? When I was a student, I cared about the score more than anything else. It was just a matter of whether it was worth it or not. Now I don't think it's worth it.
Previously seen: <br>Anecdotes about the cancellation of the unified national college entrance examination paper<br>In 2001, the college entrance examination was still a national paper, and admission was divided by province. At that time, the admission score for liberal arts key undergraduates in Beijing was 454 points, 429 points for general undergraduates, and 360 points for junior colleges; th…
The workload is relatively heavy now, and one person has to do the work of two people.
The staff are also of the same gender
Why should I increase my workload based on population proportion when the problem can be solved with one size fits all?
I am from an ordinary 211 university. I attended classes in my freshman year, but I basically skipped 7 out of 10 classes from my sophomore to senior year. I still got a job after graduation. What's wrong with that? I was even the class monitor...
What kind of job did you sign? [Cover face][Cover face]
<p>For this kind of problem, I think we still have to fight for survival. First of all, for the problems such as the school hindering the normal communication between male and female students and illegal tutoring, it is recommended to complain, report, expose to the media, or let students unite to refuse to implement the school's wrong regulations, such as collectively leaving school on holidays,…
Every family in Beijing has at least 4 houses, two for the parents, one for the boy and girl, and one for the child in the future. Assuming one house costs 5 million, that means at least 20 million in assets. Let's assume the worst case scenario, where the child will rely on the parents for support and do nothing. The house can be rented out. A house in Beijing can be rented out for at least 4,00…
Are you really from Beijing? Let me give you an example. In the past, there was a Guangdong rent collector account on Douyin, which made everyone think that Guangdong people are all rent collectors, live a rich life, and drive luxury cars. . . . . . . . . . . . <br><br>Now when I hear similar words, I want to slap them. They are so stupid. <br><br>You are from Guangdong, so your family collects r…
Are you really from Beijing? Let me give you an example. In the past, there was a marketing account of a Guangdong rent collector on Douyin, which made everyone think that Guangdong people are all rent collectors, live a rich life, and drive luxury cars. . . . . . . . . . . . <br><br>Now when I hear similar words, I just want to slam them, they are really stupid. <br><br>You are from Guangdong, y…
Are you really from Beijing? Let me give you an example. In the past, there was a marketing account of a Guangdong rent collector on Douyin, which made everyone think that Guangdong people are all rent collectors, live a rich life, and drive luxury cars. . . . . . . . . . . . <br><br>Now when I hear similar words, I just want to slam them, they are really stupid. <br><br>You are from Guangdong, y…
Are you really from Beijing? Let me give you an example. In the past, there was a marketing account of a Guangdong rent collector on Douyin, which made everyone think that Guangdong people are all rent collectors, live a rich life, and drive luxury cars. . . . . . . . . . . . <br><br>Now when I hear similar words, I just want to slam them, they are really stupid. <br><br>You are from Guangdong, y…
Are you really from Beijing? Let me give you an example. In the past, there was a Guangdong rent collector account on Douyin, which made everyone think that Guangdong people were all rent collectors, lived a rich life, and drove luxury cars. . . . . . . . . . . . <br><br>Now when I hear similar words, I just want to slam them, they are really stupid. <br><br>You are from Guangdong, your family co…
Are you really from Beijing? Let me give you an example. In the past, there was a Guangdong rent collector account on Douyin, which made everyone think that Guangdong people were all rent collectors, lived a rich life, and drove luxury cars. . . . . . . . . . . . <br><br>Now when I hear similar words, I just want to slam them, they are really stupid. <br><br>You are from Guangdong, your family co…
Are you really from Beijing? Let me give you an example. In the past, there was a Guangdong rent collector account on Douyin, which made everyone think that Guangdong people were all rent collectors, lived a rich life, and drove luxury cars. . . . . . . . . . . . <br><br>Now when I hear similar words, I just want to slam them, they are really stupid. <br><br>You are from Guangdong, your family co…
<p>Surgery is very physically and mentally demanding, so work meals and diet meals cannot be confused. </p>
What kind of job do you have? You think this is good? I think it's unreasonable for people with a master's degree in medicine to eat this.
Based on my mother's 15+ years of surgical experience, this kind of meal is really unacceptable. It is high in oil, salt, spicy food, and carbohydrates, and seriously lacks high protein. What's even more outrageous is that there are only a few dishes all year round. When you start working and your daily life involves surgeries that start at 8 hours and go up to an upper limit, you will know that …
It is very likely that you have an easy job [tears of laughter][tears of laughter]<br><br>When my mother was in her 30s and 40s, she often stood in the operating room for ten hours a day and was a vegetarian.
Eating meat and not eating meat when working at high intensity feel completely different.
Good for you, bad for many people, and you don't work as hard as they do.
The dishes cooked in this kind of canteen are often over-cooked with oil and salt, so that the dishes can barely be eaten with the least amount of ingredients and the worst quality, and people can be quickly fed. . The canteens in the army used to be like this, but they improved immediately after the country paid attention to it. So if medical workers complain more, they may have a better chance …
Yes, doctors in the US have it easy, their work is easy, they get a lot of dollars, and the food is delicious...<br>Let me ask you, the cost of medical school in capitalist countries starts at hundreds of thousands of dollars...Can you afford it? [Witty]<br>Pick up the bowl to eat, put down the bowl to curse! <br><br>Anti-argument explanation: The above rant is not directed at the vast number of …
The hospital where I interned in Zhengzhou is also a top three hospital. I had a work lunch once, which included Kung Pao chicken, tomato, egg and shrimp, stir-fried vegetables, a portion of rice, a bag of yogurt and two apples [covering face]
I think this work lunch has less meat, but the vegetarian dishes are much more varied than other restaurants [tears of laughter]
<p>I don't know if I can order food from the Peking University Health Science Center cafeteria... We usually order work meals for group meetings, and we can order from the Peking University Health Science Center cafeteria. It's free on-campus, and the price is not expensive and relatively affordable. </p>
<p>We provide working meals, not client reception. Hospitals are not high-profit industries</p>
When I was interviewing at a top tertiary hospital in the capital, they treated me to Yoshinoya lunch, saying that the food in the cafeteria was hard to swallow. The next day, I went into the operating room and couldn't order Yoshinoya, so I had a working meal in the cafeteria...en...I will never forget it...<br>Salute to the great doctors [covering face]
I'm done, I actually think it's not bad, at least there are four dishes [covering face] There are two dishes in the work meal that cheered
The working meals of capitalist medical staff are also rubbish... <br>The working meals are rubbish in the first place, if you want to eat well you have to make it yourself/find it
Holy shit, are the working meals the same in all the top three hospitals in China?
Because she is too tired, my aunt used to be very thin, but she has become fatter and fatter in recent years. Her job is considered a physical job, doing scraping and massage for people, which is very tiring every day. Logically, such a large amount of exercise should make her thinner, but she is getting fatter and fatter. Last year, she couldn't stand it anymore and took a break for a while, and…
In fact, many industries with higher education and more intense work than hospitals also provide this kind of food...
<p>“With the lowest salary among medical staff of the same medical level in the world, they provide first-class medical service quality…”??? ...
The food in Hong Kong is really not good. You always eat the same dishes on the menu. The menu only looks good and rarely changes. You get tired of it after eating it for half a month. <br>What is really enviable is the salary and workload of doctors in Hong Kong (no overtime and two days off)
Thank you for the hard work of our country’s medical workers!
<p>Comrades, this does not meet the strict definition of curls - natural curls, that is, there is no place to grow/no increment, so that it is squeezed and killed under harsh conditions. This can at most be considered "artificial curls", that is, due to the restriction of medical job opportunities/marketization, training and academic systems in one place, people dare not leave and stay to be curl…
Some people actually said it was good. The answerer has explained the situation. I don't know if you have jobs that make you fall asleep while standing. Anyway, after get off work, I think about this meal. I can't let myself down, and I don't want to make it myself. I don't care about the price, and I don't care if it is nutritionally balanced. At least it has to be delicious. I lose my appetite …
I really lie down. I watch TV series, variety shows, anime and novels during work hours every day. But my work efficiency is there, and I still have time to do PR and edit videos.
was always the top student in liberal arts in high school. My political and history teachers liked me because I almost always got full marks. But when it came time to choose my major, I chose science without hesitation. My head teacher persuaded me for half a month and even called my mom to school, but it didn't change my mind. I really like liberal arts and I can memorize things very quickly, bu…
was always the top student in liberal arts in high school. My political and history teachers liked me because I almost always got full marks. But when it came time to choose my major, I chose science without hesitation. My head teacher persuaded me for half a month and even called my mom to school, but it didn't change my mind. I really like liberal arts and I can memorize things very quickly, bu…
think there is another deeper reason that there are more poor people in science and engineering majors. A group of poor people who have finally passed the exam and are left with only their IQs see a group of rich children studying easier majors than themselves, and their families arrange high-tech jobs for them after graduation, and everyone is still called "Tsinghua". Of course, it is easy for t…
was only in the second semester of my senior year that I started to be divided into arts and science. I always wanted to work in the field of languages since I was young, and I was not good at science, so I chose arts. I will never forget that the class teacher called a few people who wanted to study arts, including me, outside and told us to give up studying arts. He said all kinds of words that…
On the contrary, I think the best job is to be an art teacher, a career-based one, with less stress, interesting work, relaxation and stress relief, and you can still work after retirement, and it can best blend work and life. But I am a person with no aesthetic sense, and I don't even have an idea for interior design.
have always liked to study history and geography since I was a child, and I am obsessed with those heroic stories in history. When I was in the first year of high school, I could get 270+ in liberal arts by attending classes and doing homework, but I still chose science when it came to the division of subjects. Now I am studying engineering in a university that is around the top ten in China, and…
have always liked liberal arts, but liberal arts has formed a bad cycle to some extent. Until now, there is a general consensus in society that those who are not good at studying should study liberal arts, which has led some people who are not good at studying to run to liberal arts, further deepening this consensus. Liberal arts are generally considered to be not doing their job properly in soci…
After reading a bunch of comments, I found that the biggest prejudice against liberal arts comes from high school liberal arts students. They mix the liberal arts they learn with the ideas that guide mankind forward, regard the politics they learn as the cornerstone of building the human path, regard the history they learn as the mirror that reflects the future of mankind, and regard the geograph…
Computer science is really the best, engineering majors don't even dare to ask about salary, biochemistry, environmental materials science majors tend to be more illusory research, medicine majors are stable and hard but have a bright future. Liberal arts, probably everyone envy them in college, but when looking for a job, they will ruthlessly grab jobs [out of body]
我正在了解的優良的教育，如有理得得良的教育，如有理得良的教育。
Living a clear life is very difficult. Most people live without a goal. Or the goal of most people is to have enough food and clothing, a comfortable life, and be rich, but how to achieve it, through which profession and direction to achieve it? What do you like, how to balance, how to turn your interest into a profession, and how to do your profession well? Different students will consider diffe…
am a high school student majoring in liberal arts. I study history, biology and geography. My classroom is on the first floor. There are also three political science, history and geography classes on the first floor. Then on the second floor are students who choose physics, chemistry and biology and physics, chemistry and geography. There is a head teacher of the physics, chemistry and biology cl…
I have been working for several years now, but his thinking is not as deep as his. He is indeed a person from the top universities in mainland China.
saw this hot review, and I think this big guy's summary is more exquisite than the bunch of my BBs: I have always liked liberal arts, but liberal arts has formed a bad cycle to some extent. Until now, there is a general consensus in society that those who are not good at studying should study liberal arts, which has led some poor students to run to liberal arts, further deepening this consensus. …
met my best friend in high school. She was always in the top two of our class and the top fifteen of the grade before we divided our subjects in the first year of high school. Later, she was divided into liberal arts. Many teachers advised her to study science, but she still firmly chose liberal arts because she had her own goals and dreams. I think it’s really speechless that many teachers say t…
It's like seeing myself in the past. However, liberal arts are not that easy. As someone who studied science and engineering in undergraduate and graduate studies and works in humanities and social sciences, I actually think liberal arts are really difficult. Just like what the hot comments said, science and engineering are about relationships with things, while liberal arts are about relationshi…
When I was looking for a job after graduating from school, I realized the gap between liberal arts and science and engineering. It is really difficult for liberal arts graduates to find a job. Even in the civil service system, science and engineering graduates make up the majority.
Honestly speaking, it is easier to find a job if you major in science... You have to study liberal arts more thoroughly.
Because studying liberal arts has always been looked down upon. I don't know what I can do in the future. The best outcome for girls in small cities who choose liberal arts is to become teachers. What can liberal arts do? What kind of job can I choose in the future? No one has ever told me. I don't know what I can do in the future. They only say that liberal arts are useless and that liberal arts…
Actually, I personally admire people who choose liberal arts, because I really admire them in every aspect. I chose science, nothing else, it would be easier to find a job in the future. My class... despises liberal arts, but a teacher at the same level really said that people who study liberal arts have no future! I was shocked when I heard it, because my concept is that except for those who don…
I am a senior in a provincial model middle school in Hubei Province... The first year of the new college entrance examination... I remember that we had to study physics, chemistry and biology for a while after the class was divided. Then there was a class with few people listening. The chemistry teacher got angry and said that we, who studied arts, couldn't find a job even though we were the firs…
They are really people living in two different worlds. Now many people enroll their children in extracurricular classes and interest classes. Some of them choose music and art. Some parents think it is a matter of pride if their children are good at playing the piano or drawing. They also encourage their children to continue their interests. It is also good if they can work in this field in the f…
I have always believed that learning art requires talent, and I have always admired people who do art. We who don't have special skills need to follow the rules. After working, I found out how wonderful it is to have a skill.
If liberal arts majors have a good reputation in job hunting, there won’t be so much to say. Looking at the average employment rate of schools last year, the employment rate of science majors is indeed better than that of liberal arts majors. But if you think about it carefully, it may be because the employment rate of computer science majors is high.
Most of the comments should be from high school, right? When you are working, you are not asked to solve a problem, and most people do not have the opportunity to do scientific research and invention. Instead, they deal with people and predict the development of the industry in society. So is it better to study liberal arts or science? This is clear at a glance.
We haven't implemented the new college entrance examination here yet. I just finished choosing between arts and science in my first year of high school. Our head teacher is a Chinese teacher, and we have more science classes. He told us in class that arts students have a narrow future and it's hard to find a job. Science students are the ones who do practical things. What can people who study spo…
There are so many people majoring in science, most of them are just for a job, but those who are admitted to a second-tier university don’t really think that they can find a job easily, right? There is no difference between arts and science at this level, and I believe that most people are at this level, after all, there are only so many people who can get into a good university [eye-catching]
When I was in the first year of high school, I ranked first in the liberal arts and seventh overall (I was very bad in science). I was very hesitant about whether to choose liberal arts or science. I asked my teachers and parents, and they all told me to choose science, so I chose it. [Covering face] But now I still regret why I chose science. It’s bullshit that it’s hard to find a job after grad…
In fact, the "Theory of Practice" and thesis writers of liberal arts and art have explained it. The problem lies in practice. That is, they cannot produce results. Or the results produced are worthless, and the value of liberal arts is not recognized. In science and engineering countries, they only pursue application. In other words, they do whatever makes money. And to be honest, in many cases, …
I have never thought that history, politics, music, art and the like (the so-called liberal arts) are useless. I can only say that those things are difficult to externalize, and in the eyes of some people, they are not enough to find a job. But if you can show it, it is very impressive.
Wise soul, knowing yourself and finding your inner drive is hard work
Our school is pretty good. Now we have the new college entrance examination. The teachers are very harmonious. They don't interfere with our subject selection and respect every subject. I feel very lucky. I am a full-time student just because I like it. If I want to find a job and apply for a university... If I like them, will I care about those science majors and jobs?
Actually, it is more important to find a job and make money now. . . I am most afraid of being alone in old age and having no money to treat a serious illness. . .
Although I am a liberal arts student, after I started working and reached middle age, I felt that it was really important to study well in mathematics, physics and chemistry.
There is no way you can't change the environment. I don't dare to say that I am studying art. My current job has nothing to do with art. There is no way to avoid the contempt chain. So students who study art should have a good attitude. After all, students from ordinary families who study art are destined not to have a good life in society. Sometimes, learning to accept is better than anything el…
Why do I choose art and literature? It is to constantly touch the peak of thought, to constantly hit the extreme of the trembling soul in a world without limits. There is a saying that is very true, a body without a soul is just a walking corpse. But in society, in the foundation of education, when you are young, almost everyone around you is instilling in you to study hard, get into a good schoo…
At first, arts was much better than science, but I chose science. University was half engineering, with a little art. Then I found that no matter what I studied or what I worked for, I couldn’t do without arts, so I changed my career and returned to my hometown to become a Chinese teacher...
I remember that the purpose of applying to a good university like Peking University and Tsinghua University is to allow you to choose your own job instead of being chosen by the job.
In order to follow my inner interests, I changed my subject selection from all science to all liberal arts this year. When my classmates found out, their first reaction was "Will you be able to find a job in the future?" or they looked at me with sympathy... This kind of prejudice is really serious. Everyone generally thinks that those who choose liberal arts are eliminated by science...
As a high school student majoring in liberal arts, I applied for Chinese medicine in the college entrance examination and finally changed my major to clinical medicine. I think it is quite an advantage [laughing and crying]. I planned it this way since the first year of high school. At worst, I could not change my major and study Chinese medicine. In the end, I changed my major. Although it is an…
studied science in high school, because the number of science students in our school who could get into the first-tier universities was several times that of liberal arts students, and it would be more difficult to get high scores in liberal arts (I was good at Chinese, math, and English, but I was equally bad at liberal arts and science). However, I studied liberal arts in college, and after gra…
Paying attention to grand narratives is equivalent to playing games. Of course, if you play games 24 hours a day, not working and not caring about real life, that is another extreme.
"What you say on the Internet has nothing to do with real life"? I really don't know why you say that. Just like what you said next about 996 and shift work, I have not experienced the former so I cannot comment on it, but how many people have not experienced the latter from student days to work? Is it okay to discuss what we have experienced together on the Internet? How many people agree with t…
Paying attention to grand narratives is equivalent to playing games. Of course, if you play games 24 hours a day, not working and not caring about real life, that is another extreme.
Paying attention to grand narratives is equivalent to playing games. Of course, if you play games 24 hours a day, not working and not caring about real life, that is another extreme.
Paying attention to grand narratives is equivalent to playing games. Of course, if you play games 24 hours a day, not working and not caring about real life, that is another extreme.
There are many people on Zhihu who talk big, say shocking things, try to attract attention, and take advantage of hot topics. There are many people who stand on the moral high ground and speak out. <br>Only a few people teach people how to live, work, and study in a down-to-earth manner. The answerer is one of them. Thumbs up. [Thumbs up]
In addition, according to existentialism, meaning is given by people. Everyone has their own meaning of life. Some people can be happy by completing their work goals and realizing their self-worth, while others need to keep spending money to be happy. You must first know what you want, and then go after it. If there is a war or disaster in the future, everything you have worked hard for may disap…
Also, who told you that I was suffering? Did I say that I was suffering? I am happy. I am happy simply because I eat a candy of my favorite flavor. I am happy when I slack off at work. I am satisfied when I sleep in. Not to mention that I do a job that I like. My value can be reflected in various ways. I am very satisfied with my current situation. I just want to see what these answers can write.
If you study without thinking, you will be lost; if you think without studying, you will be in danger. <br>I suggest that you should watch and have your own ideas, and work should be done seriously. The Internet allows us to see what the collective is concerned about and what problems are around us. What we do is to cater to such a trend. Those who have the ability to change themselves along the …
Chinese people pay too much attention to these things and too little attention to their own work, so there are many more failures in China than successes.
I am too tired from work.
Pay attention to work → find that you earn less but spend more, find that your rights and interests are not protected, find that the labor law is just a piece of waste paper → find the reason → look up
Your point of view makes sense. I also agree with the author's so-called information overload [covering face]. There is no right or wrong in this matter. The real world is simulated. There are no clear boundaries. It is difficult to say clearly where the degree of receiving information is. Everyone wants to live a good life and has the desires and pursuits as a human individual. Sometimes, when y…
What you said is very good, but the question is, how can I find a stable job?
Some people use the argument that you dare not do it, there are plenty of people who can do it, and if you don’t work 996, you will starve to death, you don’t have to be afraid of those threats and inducements. <br>Capital is definitely profit-seeking, the question is why the cost of breaking the law is so low, much lower than the benefits, and even if it is indulged, companies that abide by the …
discovered this through my business and work over the years, but I was already over 30 when I came to this conclusion. I was so angry. Some things cannot be said openly. Anyway, I think 60% of the education in China is brainwashing. Only by really caring about yourself can you be responsible for yourself and your family. But I think young people can't listen to it. They won't understand if they h…
It may take a certain amount of ability to go that way. I realize that some students and people who have just started working may not be able to take that path. Although it is the most correct path, it is indeed much more difficult than this step-by-step approach. Some answers only apply to some people, not everyone.
The view is slightly different. I think that most ordinary people are indeed planned according to consumables in the eyes of the superstructure. Continuous efforts can only turn you into a "high-quality leek with more surplus value", but "blindly lying flat" is also "unsustainable" according to the current welfare system that is approximately equal to 0. <br><br>So, my personal conclusion is that…
The answerer's meaning can be summed up in one sentence: you think too much. Thinking too much may lead to meaningless anxiety, but it is also the only choice to distinguish the direction of work, study, and life. Otherwise, what should we do if we spend our whole life on the wrong path and get nothing in the end? Life is bound to have fluctuations, sometimes information is overloaded, and someti…
[Tears] Only focus on work and reading reference books? The author wants to brainwash young people into being tools, but there are more than 8,000 people who like it
Keep your head down and be yourself. I was very depressed a few days ago. I felt powerless and empty when I got home from get off work. I was also exhausted from work. I was just a person. I'm sorry. I saw this today and felt a little sober.
am the typical person who doesn't care about anything. I don't care about celebrity gossip, entertainment variety shows, or anything else. I only care about my own life and work. Only when I am down-to-earth can I do some small things with peace of mind. Sometimes I feel that I don't listen to interesting things, but I am really not interested in them. They are too far away from my life, or I am …
It is normal for the answerer to be criticized. You should know that Zhihu is for you to vent your emotions. If you really have problems at work, wouldn’t you go to your peers to ask? Why come to Zhihu? It is reasonable to be criticized for expressing such emotions on Zhihu. [Surprise]
think what the questioner said makes sense. Many answers put themselves on the opposite side at the beginning and want to be unique and far-sighted. I think this is very strange. Why does the questioner say that paying attention to details means being a capitalist and working 996? Doing your job well is not just working hard. If you have learned skills, you have learned skills. If you don’t want …
Everyone goes with the flow, accepts it, and makes do with it. Is this how society should be? Can graduate students not find jobs because they have no connections or money? I have worked hard for 25 years, just because I pay too much attention to grand narratives? What the answerer said is good, but for ordinary people, there is very little I can do...
[Agree] You should focus on your own field, for example, make every effort to solve the problems you encounter at work, overcome them one by one, keep learning relevant knowledge, and be positive. <br><br>Don't care what others say is reasonable or unreasonable, don't believe any news or information, and only focus on solving work problems. <br><br>Reduce entertainment time and read more classics…
It makes sense. There is indeed a lot of negative emotions on the Internet now. As a young person in his early 20s, his thinking and concepts are not mature enough. He does not think dialectically and is often indoctrinated. It is better to devote his main energy to study and work, live in the present, experience the sense of fulfillment of getting stronger little by little every day, and constan…
really want to cry when I see this. I feel that I have received too much information and am full of worries and concerns about the future. It may be 5, 10, 20, or 30 years. Then my work and life will be very lazy. Just like what the answerer said, I have received too much information that does not belong to me, has nothing to do with me, and I don’t know if it has anything to do with me. The more…
Another leader whom I respect and admire very much also advised me that if there is no environment that completely meets my expectations, I should work hard to change it instead of avoiding it if it does not meet my expectations. I know that all the leaders I respect and like are not favored by the boss. I really don’t think I have the skills that the boss thinks highly of [crying]. I am really s…
But when I see the seniors around me who I admire and want to learn from are scolded all day long and live like dogs, I’m really scared [cry]. I don’t have much confidence and I don’t have any irreplaceable special skills. I’m really scared of repeating the mistakes of my seniors, even though I’m not scolded now (reasons of suspicion are that I’m not married or have kids, I’m relatively young, an…
Many things cannot be changed even if you think about them. It is just a waste of energy. You should put your energy into things that are beneficial to your actual life, such as improving your concentration, finding a good job, learning more life skills, and reading more books to expand your knowledge. These are the most meaningful things for you at the moment. Even if you only change a little bi…
<p>I strongly agree that we should focus on solving problems at work, or overcome or solve them one by one. Who hasn't grown up this way? In fact, solving specific problems is relatively easy, but solving the empty inner demons is more difficult. This is probably because it is easier to defeat the thief in the mountain than the thief in the heart.</p>
I went to France 11 years ago [cover face][cover face][cover face][cover face] and returned to China last year. But I really don’t have any illusions about this country [laughing with tears][laughing with tears][laughing with tears][laughing with tears][laughing with tears] Every time I ask my French friends to take me to eat snails, they need to do some preparation. Only traditional French food …
Ground pork, fried eggs, Chinese cabbage, and rice. I think it may be even cheaper than this. Let’s not talk about whether it’s organic or not. Just buy the cheapest. In US dollars, a dozen eggs cost $1.50, a pound of ground pork costs $1, and a pound of Chinese cabbage costs $70. Two pounds of pork, one piece of Chinese cabbage, and a dozen eggs cost a total of six dollars, which can last for fi…
Rice with egg, rice with soy sauce, rice with cola, and I have seen a powdery substance sprinkled on rice that tastes quite good. I don't think it's too expensive. Some Japanese office workers work too long and are under too much pressure. They are also single and don't have too high requirements for food.
I used to think I was slow at work and my performance was always below target! Later I realized I was doing the work of two people!!!
First implement an 8-hour work system, then recruit more people to complete the 996 workload, instead of treating people like batteries and replacing them with the next one after they run out.
I used to think I was slow at work and my performance was always below target! Later I realized I was doing the work of two people!!!
First implement an 8-hour work system, then recruit more people to complete the 996 workload, instead of treating people like batteries and replacing them with the next one after they run out.
have a friend who wants a sweet love, a strong body, and he wants to cultivate his own interests and hobbies. However, the number of months he works on the construction site is equal to the number of days he takes on vacation, the amount of money needed for the dowry is equal to his age, and the amount of money needed for the house is equal to his height. After a few years, my friend has a hernia…
To pour cold water on you, what the teacher said makes some sense, but it is still limited. With the continuous development of science and technology and the continuous improvement of productivity, the competition for jobs in the future will no longer be limited to people. More and more low-end jobs will be replaced by machines, and these jobs will occupy the employment of most people. Artificial…
Let me add: The life of an ordinary person Before the age of six: preschool education Six years old: first grade Twelve: primary school to junior high school Fifteen: high school entrance examination Eighteen: college entrance examination Twenty-two: graduation, start working Twenty-five: struggle for three years, monthly salary of 5,000, borrow money for down payment, repay the loan for thirty y…
How can I avoid competition? There are only so many jobs and so many competitors. If you are willing to work for 6,000 yuan, I will work for 5,000 yuan. If you work eight hours a day, I will work nine hours a day. If you work five days, I will work six days. If my qualifications are not particularly outstanding, I can only reduce my salary and extend my working hours to increase my competitivenes…
Salaries have increased several times, but prices have increased dozens of times, and working hours have almost doubled.
Let me tell you about the 996 operation skills of Internet companies. First, recruit two people, but increase their workload little by little, until the two of them can just finish 996 every day. Then give them symbolic overtime pay and various small favors (such as free coffee in the tea room, so you won’t feel sleepy after working overtime), but in fact two people are doing the work of three pe…
am very upset now. My family conditions are better than those of ordinary people. I just graduated from college and work outside. My salary is 5,500 yuan. I have to pay rent, water and electricity bills, and I can only save about 2,000 yuan a month. My family likes to use our family's money and house and car to ask me to have a relationship. They even say that we don't have enough money to have a…
My company has upgraded its services and products, but it has increased by cutting employee wages and increasing employee workload. I have worked for three years and have seen that more than 10 people used to work together to complete one task, but now 4-5 people complete one task. One person needs to do the work of two or three people at the same time, but the salary has dropped. The total amoun…
What I don't understand is that my brother and sister-in-law are planning to have a baby next year. I'm confused. My sister-in-law plays games at home all day long. My brother relies on my father for work (about 2,000 yuan). He only works half a day every day. After get off work, he comes to my house to play games for an afternoon and takes a lot of things when he leaves. The house they live in a…
I always feel there is a logical loophole. Everyone is so poor that they can only buy low-end products worth one or two yuan. How can they afford to pay for high-quality delivery services? In this demand, which one should prioritize products or services? Moreover, the reason why the delivery guys have low wages is because there are many unemployed people. Shouldn’t we implement the 8-hour work sy…
When looking for a job that requires people to be under 35, or even under 30, I don’t think there are too few people [藏狐]
Don't believe in involution. The country has the ability to regulate. Everyone can be assured and bold to do their best! It doesn't really matter whether you have children or not. There are so many high technologies, so many new technologies, and so many new machines. The population size doesn't matter at all. A production line that used to require many people now only needs one person. A buildin…
When I was in school, I refused to download Pinduoduo. I and many of my peers thought that this thing was not good in every way. After I started working, I found that even if it was not good in every way, it was cheap and I could make do with it. I had to make a living first. From the time I started to switch from Taobao to PDD, I told my friends that people will eventually lose to life [藏狐] and …
have graduated for four or five years, and if you count the time I have worked, it is almost five years. From having to rely on my family for support when I just graduated, to being able to live on my own, to now living a relatively easy life, with half of my salary saved every month. But when I saw the betrothal gifts given by my friends for their weddings, and the high housing prices, I chose t…
Work tells us: Why do we need so many people? [doge]
am an ordinary worker. I don't know when the factory changed to three shifts, I don't know when my salary became the local minimum wage standard + overtime pay, and I don't know when my colleagues with connections around me all became high-paid and idle jobs. With a meager salary, I wanted to find a part-time job after work to supplement my family income. The next day, the company issued a docume…
It's really too difficult, and it's even worse in Anhui. For medical students, the school is shortening the study period. Hospitals generally don't offer internships (if there is, it's only a few dozen yuan, and that's the night shift fee. If you don't work the night shift, you won't get any. Some hospitals will even delay paying), and some don't provide accommodation. Not only do you have to pay…
The holiday hasn't started yet, but the work group is acting like they don't plan to take a break for 7 days... I have to add one more day. I wanted to complain but I found that I'm already happy...�️
Recently I remembered this sentence: If two people do the work of three people in a company, the income of the two people will increase. Then will the money from the extra work of the person be divided equally among the other two people?
At the age of 18, he went to college and began to let himself go. At the end of his sophomore year, he began to regret his childish behavior in the previous two years, so he began to work hard. At the age of 22, he graduated from college but found that he could not find a job that satisfied him. At the age of 26, he saw that everyone around him got married. The money the bride asked for increased…
How to measure your salary? Average daily salary/day's working hours. People who only look at the total amount and not the hourly wage will definitely find it difficult. I have many customers here. Designers have a guaranteed monthly salary of 5,000 to 6,000. I work in a bar, with a fixed salary of 4,000 a month, but eight hours a day, and clear the place on time at 1 a.m. They go to work at 9 a.…
I am so tired that I don't even have the desire to chat with my partner. I have so little rest time that I can't even sleep enough. After paying off the mortgage, there is little income left. After getting married, I still have to go to and from work to pick up and drop off the children, enroll them in cram school, cook for the family, and my work is not going well. [Tibetan Fox] Life is so miser…
In addition, I never think that increasing working hours will increase income. Even if there is overtime pay, it is just a drop in the bucket.
won’t have any children, and I have also decided not to get married. Why? Life is becoming more and more colorful now. The idea of raising children to provide for one's old age and continue the family line has become obsolete. The most important thing is to live a happier and more comfortable life alone. Not having to buy a house saved me more than 500,000 yuan. I directly built a small villa in …
The income is just enough to support yourself, but you also have to support your parents and children? Various family problems have emerged. In fact, it is a good thing that these things have surfaced, but the results are mostly not satisfactory. Another thing is that you are too tired at work and don’t want to continue to communicate with others. The general environment is crazy about you gettin…
As I said before, teenagers are stressed about education and study (five days a week in school, two days in tutoring classes), young people are stressed about furthering their education (too much pressure to prepare for the postgraduate entrance exam), and after work they are stressed about the company (no one on the way to work, no one on the way home from get off work). How can they have any ti…
With fewer people, it will be easier to find jobs and higher wages.
8 hours of work, 8 hours of rest, and 8 hours for yourself [doge][doge]
I used to think I was slow at work and my performance was always below target. Later I realized I was doing the work of two people!
It is too expensive for men to get married and have a relationship now. The capital behind it promotes the superiority of women over men. If you love a woman, you buy her this and that. Women love to compare. There are too many cases around us. Women complain that their husbands are busy with work and do not take care of the family. Women complain that their husbands do not have ambition to work …
I don’t have a good job, I don’t have money, I’m in debt, and my family is urging me to find a girlfriend. I’m also gay (not out), so I’m really stressed. I’m going to work abroad next year. [藏狐]
The wages of couriers have increased, but the wages of other jobs have not increased. Does this mean that everyone should be a couriers?
My family has been a single-line family for four generations. If I want a child, I have to have one. My family has three houses, so we don't have to worry about housing. My parents are both in the system. They will retire before the age of 50 and each can receive a pension of about 10,000 yuan. I also work for the government. After all, I just started working and earning more than 5,000 yuan is c…
Seeing my parents working hard every day and lying down to watch TikTok until they fall asleep, I feel that this kind of life is very sad... There is no spiritual pursuit at all. Every time I see it, I remind myself that I must not do this in the future and must leave time for myself to improve myself.
now earn a higher salary than my parents, but it is still difficult to support myself in a big city. On the contrary, my parents, even if they were just working in the service industry and didn't make much money, had the courage to have a second child and rent a big house. I am convinced. I used to work on weekends, but now I have only one day off and work every week. I am almost going to get ste…
After all, not everyone is born without worries about food and clothing, and young people are lucky if they don’t spend all their money. If it weren’t for the good deeds of their ancestors who arranged jobs and houses for them, how could there be such an easy life? [Thinking]
If I don't get married, in my current situation, I have already bought a car and a house, work 6 days a week, from 8 am to 4 pm, and the workload is acceptable. I get a salary of more than 7,000 yuan in a third-tier city, and the company provides meals and fruits. After get off work, I can do whatever I want, without having to do a lot of housework, cooking and coaxing children. I can sleep as la…
work in Hefei, and I see that almost every family has two children. In Anhui, I feel that the idea of favoring boys over girls is more common. Is this data true?
just graduated this year, from a junior college. Some of my classmates went to private companies, but after deducting rent and food, they couldn't save much money. I'm in the construction industry here, with a 007 work schedule, cut off from the outside world. I came from the countryside, and my family didn't have much money. I wanted to save money to buy a house, so I worked in a semi-endured st…
There are only a few good jobs.
For door-to-door delivery, someone at home has to sign for it. On weekdays, most people are not at home, so the courier has to deliver the goods at night. Otherwise, the goods have to be left at a collection point.
It’s okay, if I don’t have a life, there will be plenty of life, just like if I don’t do a job, there will be plenty of people who can do it, right? [doge]
Rest eight days a week, work eight hours a day, implement
I’m afraid of losing my job at the age of 35, as this is the time when my children are young and I need money. Who would dare to have more children if there is no stability?
Now I am in the third year of high school and I am already thinking about what to do in college, how to find a job, and how to support my children and parents after marriage [eye-catching] I don’t want to stay in this broken life for even a second [Tibetan Fox]
I studied a bad undergraduate degree and now work in micro-marketing, earning about 4k a month. When I was young, I never thought about taking the civil service exam because I thought it would not give me freedom. Now I want to start a business while working, but my business is basically a failure. I have already thought that taking the civil service exam will ruin my life. I dare not even think …
am ready to resign. I feel like I haven't worked for ten days. There is no need to talk about it. During the quarantine period, neither side gave me any response. At least it made me feel at ease. It was uncomfortable to be caught in the middle. I don't want to work anymore. There is no need. Home, there is no home to go back to. I will go wherever I want in the future. If I die, I will die. In f…
I'm too busy at work. If you had more free time, do you think you could have a romantic relationship and get married?
It is too difficult to break through the class system. I don’t want my next generation to be like me, working all their lives just to buy a house.
If you only work 6 hours a day and have three days off a week, which family can you think would be particularly unhappy?
Working intensively for more than 12 hours a day plus a 2-hour round-trip commute makes me so tired that I don’t even have the desire to get married or have children. When I get home, I just want to sleep.
Too busy at work and not enough money.
Cancel the school district enrollment system, and students can choose to go to school nearby. School teachers must be transferred every six years. The government can increase housing and transportation subsidies, and collect property taxes as soon as possible. Only by removing the messy attributes of the house can the housing price return to its original value.
Let me tell you about my father's experience. My grandparents were workers in their early years. After the reform and opening up, they started selling clothes and doing small business. My father grew up in the county town when he was a child. But he was a good student. He ranked third in the county (about 5,000 students) in the college entrance examination and was admitted to Harbin Institute of …
am 33 years old, a woman. I am still not ready to get married and have children. Or strictly speaking, I am ready to get married, but I really can't be a mother. Especially since most women around me are widowed and raising children, and they are busy enough with work every day, I really can't do it. It's terrible.
It's not that I can't live off my parents. After all, my mom and brother both have stable jobs and good incomes. I just want to make a name for myself. I don't want to rely on them for support, nor do I want to stay at home.
24 years old, college graduate, no car, no house, no job
The logic is right, but it does not fit the reality. Not applying for the lottery can reduce the unemployment rate, but wages will not rise because the economic structure is not good and jobs are in short supply. However, due to the high cost of living, many people will take the initiative to apply for the lottery, and the result is naturally difficult to reverse.
Even if the courier fee increases, the boss can assign the courier work of three people to two people, leaving the other person unemployed and looking for a new job, thus lowering the industry's wage level.
The older generation always wants to urge children to have children, but they still don't understand the difficulty of modern work and the difficulty of life after having children. The older generation thinks raising children is easy because they didn't put much effort into raising children. For example, my mother's generation had many children, and the older children took care of the younger one…
You are putting the cart before the horse. Product upgrading is not just a matter of raising wages according to the law. The essence is that you have upgraded. This is why developed countries have high wages and short working hours, because they occupy high value-added industries! We are now upgrading our industry. This process is painful and difficult. Whether it will succeed is still unknown!
Accumulate production capacity until it is overcapacity, and then reduce the population by half at once when the overcapacity is consumed, and at the same time have a large amount of technology that does not require labor. Only by achieving all of the above can we completely break the current environment, which is difficult to do and not practical. Even if we have technology, it will be more diff…
Take more time off, and don't have to live your life according to a rigid routine. For example, many people want to travel just to relax, not just to check in with internet celebrities, but they have never dared to go because of funding and time issues. In fact, it is not difficult. Many beautiful scenery is free, and you don't have to take planes or high-speed trains to travel. Small places for …
In fact, think about what people pursue in their lives? Ordinary people spend most of their time going to school, working, getting married and having children. It is not because everyone likes going to school, working, getting married and having children from the bottom of their hearts, but because this is the idea that we have been instilled with since childhood. If you don’t go to school when y…
was not in good shape during the college entrance examination and my own abilities were insufficient. In addition, the time stipulated by high school was very unbalanced, which made me extremely tired. I was sleepy half of the day in class, which basically resulted in negative returns. Later, the school arranged me to a temporary class and I could not return to my main class. The teacher was also…
thought my salary of 6,000 was low, but after reading the comments, I realized that there are so many jobs that I thought would pay high salaries but the salaries are so low [囧]
Our company has been cutting manpower in various ways in recent years. With fewer people, many people have to work overtime every day, customer service cannot keep up, and targets cannot be achieved. Later, we hired new people, and the old employees were already overwhelmed and had to train the new employees, which made us even busier. Anyway, work is not going well and I am in a state of anxiety…
My cousin is very busy at work. When she reached the age of marriage, she met her husband through an introduction. After marriage, her husband did not work and played games every day. My cousin was the only one who earned money to support the family, and she also had to give her husband pocket money. The wedding house was also paid for by my cousin's family. Her mother-in-law's family is quite po…
It really made me angry. I don’t work overtime unless it’s urgent. When I was almost home from get off work that day, a colleague called me and asked, “Have you finished your work before you leave? If there are any problems later, you will be responsible for them yourself.” Then she hung up the phone. I blocked her and told her not to contact me if she has any problems in the future. [Eye-irritat…
Not true. The improvement of express delivery service quality has increased the working hours of couriers. If the working hours are not extended, the service fee for each package will inevitably increase. It used to be 50 cents per order, but now it is 1 yuan per order. The content that needs to be covered by the framework has become larger.
It's useless to say anything. We complain that we have too much work and no time to have children and take care of them, but the carnivores want you to work 24 hours a day and have to have children and take care of them at the same time. It's too much to expect them to reduce your workload and give you holidays. It's a blessing that they don't legislate to force you to have children.
It's a holiday, not only do I not have a day off, but my workload has also increased. What is this?
[doge] I said to my mom: You see, if two men get married, each of them has a house, they can play games together, travel together, and work together. Each of them buys a car, and they don’t have to worry about the license plate restrictions. How great it is. Except that they can’t have children. My mom glared at me [funny]
I earn 8k a month. I have to pay rent, water and electricity in a big city. I also have to eat, which costs at least 3000. I also have to buy skin care products, clothes, have dinner with friends, and socialize. I am tired from work and want to relax. How much can I save? I still have to buy a house. I will save until the end of time. Dating, getting married, raising children, which one doesn't c…
It's a very simple truth, that is, those who have no money and no partner work hard to make money and have no time to find a partner, while those who have a partner work hard to make money to buy a house and have children when their jobs are stable. I am 27 years old this year, and my classmates who are married and have children either settled down in their hometown county with a house price of m…
[Speechless]…What our leaders say most in meetings is that if you don’t do it, there are plenty of people who will do it…Hold your wallet tight when you go to work and don’t get deducted…It’s hard to find a job outside…[Covering face]…The way the unit improves service quality is to set up a lot of new deduction items…Increase the deduction amount by 10 times…For example, deduct 500 for not wearin…
I have already quit my job. The work is tiring and the salary is low. Wouldn't it be nice to just lie down and live happily? [Great!]
There are many people from Anhui who rent houses in my community and live there long term. I can only say that most of them have left to work.
So why doesn't anyone limit the working hours of investment bankers? Investment banks are not short of profits. A person can earn millions a year. Taking out a portion of the money and hiring a few more people, wouldn't it be better for everyone to earn less to increase headcount and improve work-life balance? Do all the strong men who work in investment banks want to be bald by the age of 30? Ve…
Because I feel that my life is neither good nor bad, but it is not the life I want. I don’t want to continue to live this kind of life with my partner in the future. Therefore, I don’t have much energy. Work and life are inseparable, so what else can I talk about? [藏狐]
27 years old, graduate school graduate, no house, no car, just preparing to work, a virgin [laughing and crying] There is no way I can have a child before 30
There is a place that disagrees that technological progress will inevitably lead to lower costs and then cause some people to lose their jobs. This is not just caused by internal circulation. For example, the emergence of artificial intelligence and deep learning has replaced many jobs related to these. For example, pricing, which previously required a lot of people to do, may now only require a …
Should the relationship between salary and workload be an exponential curve or a linear relationship?
I really can't afford it. I gave birth to two weak children. I have to work two jobs every day to barely support them, from 5 am to 12 midnight.
The salary is low, and I have to take time off on holidays. I don't even have time to have a proper meal with my family and friends, let alone find a partner.
Now, I don’t think about having children. Marriage, house, car, dowry, children, and life in the future. Every time I think about it, I will continue to work decisively, save some of the salary, spend some, and live a good life of self-sufficiency.
Reduce statutory working hours and increase minimum wage standards.
Artificial intelligence and technology will replace some physical and repetitive work. It is still difficult.
If there is a job near your hometown, it is okay if the salary is low. I suggest that everyone go back to their hometown to work. You can go home every day, spend less, and make some contributions to your hometown. More than 30% of people have returned to their hometowns, and slowly everything in the city will return to its previous level!
[Covering eyes] I went home and saw my parents were old but still working. I studied for so many years and didn’t bring anything to the family. I suddenly grew up all of a sudden [grievance]
If I don't do a job, someone else will do it. If I don't have a child, someone else will do it. Why bother yourself? [doge]
How many people don't have a holiday during the National Day? I just graduated and started working and I'm already working as two people.
As long as people in big cities are willing to sell their property and live and work in small cities, their life will be very comfortable.
Not good at all. I hope everyone will have more children. I am afraid that when I am old, my social security will be too low and I will have to work.
The mess at work is more awesome than the work itself. There are more apps to learn on vacation than at work.
I think: it is bad for the courier brother or the impact is not big! Reason: delivery requirements → increased workload → employee loss → increased wages (increased courier costs) → increased freight → reduced online orders → courier orders return to a new balance → courier brothers continue to receive wages after the game between labor and the market! So I think the courier’s salary does not dep…
just started working for two years and I'm thinking about retiring.
Delivering express in Northern Europe makes a lot of money, but who can get a work visa? In Europe and the United States, if you can get a work visa, you can earn more by doing heavy manual labor.
Two points. First, the marriage law must make families more united rather than divided; second, the pace of life should be slowed down and wages should be appropriately lowered. High wages will squeeze the capital side, and individual workers must work at a high intensity. One person does the work of two people, resulting in fewer jobs and intensified competition, leading to internal competition.…
Housing prices, commodity prices, life pressure, time pressure, work pressure, anxiety, etc. The most important thing is that wages cannot keep up with living expenses.
Our 996 work schedule is actually less than our normal working hours, so we just slack off [doge]
What about the third courier? He was eliminated and the job he found paid even less than before. It’s OK if you have a degree, you can do anything, but it’s hard to find a job without a degree. Now a production worker needs a high school degree. [doge]
But if the entry threshold is increased, wouldn’t it also lead to most companies raising the entry requirements, and those who come to work may not be able to meet the requirements and face unemployment? [Thinking]
The population trend is here. Competition is a manifestation of competition in a population environment. Once the population base is down, do you think there is anyone to compete with you? Why do people work less hours a week in foreign countries? Look at the population in foreign countries, they are not even a fraction of our country.
I am in high school now, and I don't have any special life experience. Going to school for 15 hours a day is already a bit unbearable for me. I still have to take the college entrance examination in the future. My family and teachers all say that life will be easy after I get into a good university, but looking at the comments, it seems that even if I get into an ideal university, life may not be…
Why not have a baby? My classmate went to university in Beijing and works in Beijing. She got married last year and bought a house near Hebei. Even those who have been relocated cannot afford to buy a house in Beijing. She gets up at four o'clock every day and goes out to catch the bus to work at five o'clock. She doesn't get home until after nine o'clock in the evening. She does want to have a b…
It's very simple. You can find out by going to Exile City. Some people are too busy to have newborn children, so in winter some people have to stop working and go home to have babies.
Do you expect to buy a house and find a job easily? [doge]
There is one question I don't quite understand. It's not about the opposition between men and women. Most girls dislike boys who don't have a house or a car, but you said that the blind date boys dislike the girl's lack of a house. I think this situation is common because the man's family is well-off, and he needs the girl to have a good family and a stable job to put forward a "real estate" requ…
Let those who want to live have their own lives. Work is tiring enough, and I haven’t saved enough for a down payment yet [yawn]
What's wrong with me being lazy? If I'm asked to work overtime, I won't. If I'm asked to work more, I'll just slack off.
The will to survive is still very strong. Does the reduction in jobs have nothing to do with the direction of policy? [crying with joy][crying with joy]
I don't even have a job.
Others compete on working hours, you compete on work quality. When everyone's work quality is high, this high-quality work is no longer valuable.
My previous job was from 9 to 5, with two days off. I earned 9800, and 130,000 at the end of the year. Now I'm back home, working 4 shifts (day and night off), 12 hours per shift (actually at least 14 hours), and I have to work overtime to clean 5S at irregular intervals during my breaks, with overtime pay of 80 per day. All in all I earned 8500, I don't want to do this anymore!!!
My current wish is that our family of three is healthy, and I work hard to make money and take my parents out more often. I don't want to be forced into marriage. If I find someone I'm comfortable with, I'll go with him. It would be easier if I haven't met someone.
Sigh╯﹏╰ I really can't roll anymore. When I was working before, even if it was a job with two days off, I didn't want to do anything during the holidays because the work was too full from Monday to Friday. I just wanted to sleep. Later, because of the epidemic, I moved to another area and could only find a job with one day off. It's even more terrible. How can I still fall in love, get married an…
If increasing the wages of couriers depends on increasing the risk of couriers withholding wages in order to reduce the total number of employees, then where can the unemployed go to find jobs with lower risks and lower barriers?
The issue of work has troubled mankind for hundreds of years [laughing and crying] Seeing the familiar theme reminded me of the history and philosophy I learned before, and I felt mixed emotions.
I don't ask for a rest, I just want to find a job in my hometown. Can you do that? You can't! [Hot eyes]
understand the reason, but I think this situation is not something that we middle-level and bottom-level people can change. The simplest thing is that the boss wants you to work overtime, and you say that for the sake of the environment, you won’t work overtime. Okay, the boss says to replace you with someone else, and you lose your job and income. How can you live? The person who replaces you co…
I work twelve hours a day and have three days off a month. How can I have time for love?
Only by improving work standards and increasing labor costs can the employment rate be effectively increased.
Those who got married early in the past no longer take care of their children, citing work as an excuse. [doge]
The housing prices are too low, which cannot inspire the desire of young people at all. The work is too easy, and they don’t want to start a family at all [狗子][狗子][狗子]
What I don't understand the most is why we have so many people but one person has to do the work of two people [藏狐]
[doge] But we can’t hire people just for the sake of hiring people, as this will only reduce efficiency. It is better to provide skills training so that people can improve their skills and do more meaningful work.
friend of mine said to me during a chat: In the past, people could have everything if they worked hard, but now they have to know how to earn money. My friend is in his 30s, has no car or house, his family is average, and he is not married; I have everything, my family is not bad, and I am not married. I am particularly annoyed by men who only focus on money when they first meet. After watching t…
[Luo Xiaohei Wars_Trapped] Not to mention whether you can afford it, with the current fierce competition, even if the couple are equally wealthy and can afford to buy a house, support a home and raise children, for women, in such a competitive society, having children will be a devastating blow to the physical and mental health and competitiveness of most women. By then, the retirement age will b…
Because of the nature of my work, I've paid out more than twenty shares of money [angry][embarrassed] and I can't get any of it back [rolling eyes] But it's much cheaper than the cost of having and raising a child.
In a word, the salary is low and the work is busy. The monthly income of 4000 can only support myself.
I am too busy with work to have the energy. If I just leave the child to my parents without participating in their growth, I might as well not have the child. Wouldn't that mean I'm giving birth to a child for my parents? It's annoying. I am selfish and don't want to devote my whole life to my child. I just want to live my life well. It's good to be free from worries.
Does it matter if 10 people compete with you for your job or 100 people compete with you for your job?
Reasons why young people are unwilling to have children: The old-fashioned but never-changing housing price problem. The heavy, boring and long working hours, with no spare time at all, and only two days off a month just to have a good rest. The century-old custom of bride price. The distorted ideas of men and women about marriage and the ulterior motives of the opposition between men and women i…
When I was young, I thought about finding a good job, marrying a girl I like, and traveling when I have time after work. Then I went to middle school and high school. Maybe because I didn’t work hard, my grades got worse. I realized that my family’s financial situation was not good, so I thought about supporting myself and giving some money to my parents. Getting married? My girlfriend didn’t eve…
Let me tell you a joke. When I left the office, two people came to take over my work. After teaching for a week, they still said there was too much work. Anyway, I left.
The service upgrade has come to me. In fact, the same work brings different experiences to customers. I think customers should also increase their returns.
I am 24 years old, working two jobs, working 12-14 hours a day, earning 8,000 yuan with no insurance or fund. I have desires that need to be vented, but I really have no interest in women.
Working at your own expense in the first year of work
Involution is also forced. At work, after everyone has finished their assigned work, they go and grab the work that has not been assigned yet. If you don't do it step by step, you will be interviewed when your performance is calculated [藏狐][藏狐][藏狐][藏狐][藏狐] Enough is enough. There are still too many people, but there are still too many fucking people.
I don't understand why there is involution. I don't want others to work hard. I just want to work hard myself and work within my tolerance. Others feel tired after working 8 hours, but I don't feel tired after working 12 hours. So do I have to stop working like others? Can't I use the remaining energy to create wealth and value?
started slacking off at work. I felt that the atmosphere in the company in Shanghai was good. Basically, no one worked overtime, and the employees would leave at a certain time. I felt that I didn’t need a lot of money, just enough to spend. I didn’t have a strong desire for money anymore, and I had a mentality of just lying down and letting things go. After working hours increased, my mind was n…
The fundamental reason is that people nowadays no longer have the energy to love. A person's energy is limited. Half of it is consumed by work, and the other half is consumed by self-rest and recovery. There is no energy left to spend on love.
It's the same for everyone. My family made me give up my car repair job that paid 4,000 to 5,000 a month and work in a company that paid 3,000 a month. It was normal at first, but now I want to run away. I'm making 1,500 a month, but after deducting 1,200 from the general arrangement, and my home is far away, I only have 600 left this month. You tell me you want me to have a relationship, but I t…
The point is that it is easy to get married but difficult to get divorced. The man even beat his wife and committed domestic violence, but the staff asked them to go home and think about it, and did not let the woman get divorced. Who wouldn't be scared? And this is not just one or two times, there are many cases.
Let me add: The life of an ordinary person Before the age of six: preschool education Six years old: first grade Twelve: primary school to junior high school Fifteen: high school entrance examination Eighteen: college entrance examination Twenty-two: graduation, start working Twenty-five: struggle for three years, monthly salary of 5,000, borrow money for down payment, repay the loan for thirty y…
am from Anhui, my hometown is Lu'an. I studied at Anhui University of Science and Technology in Huainan. After graduation, I went to work in the provincial capital Hefei for two years. Now I am back to work in Lu'an. I think the problem in Anhui is really big. I wrote a few hundred words, but a few hundred words are obviously not enough to summarize the problem, so I deleted it. If I have to summ…
think the fundamental reason is that raising children is too expensive. It takes too much time, money, and energy, and it even affects parents’ work. Our parents’ generation was not well off, but raising children was relatively simple. Children can take care of themselves when they are a little older. It doesn’t cost that much and it doesn’t affect their work that much.
I joined the company in the first year after graduation. For some reasons, I was afraid that I would not be able to report to the company. After explaining the situation to the manager, the manager said directly: "Our company is not much more with you, and not much less with you." I was young and unconvinced at the time, and felt looked down upon. I kept saying MMP for a long time. What I hate mo…
So my friends are all saying that the end of the universe is the essay and the civil service exam [tv_sad], although the salary of civil servants is not high, it is definitely not low in the local area, and the work is normal. Who doesn’t like excitement? [tv_cry]
The bride price is expensive, the salary is low, I can't afford a house, I can't afford a vacation, I can't afford to get sick, I can't afford a girlfriend, I can't stop working
My boss said something today. I thought about it for a while and didn't interrupt. She said: Look at those who are not married now, how many of them work very hard? I don't want to listen to the voiceover.
If you don't want to have children and get married, you don't have to consider buying a house because it won't affect your work. You don't need a dowry and your body won't suffer. How can you not meet DINKs in real life?
I used to work in a courier business, but I stopped doing this when the unit price dropped to a few cents. Besides, the courier industry is not suitable for young people. It is repetitive and boring work every day, and there is no room for advancement, which will only waste your youth.
Working 300 days a year is unbearable
have no problem supporting myself, but the problem is, if I have another boy, I really can't afford to support him. I proposed marriage to my ex-boyfriend, but he said he didn't have money right now. Is this his reason for not getting married? He was holding hands with other girls, so I dumped him. I didn't expect that there was really a woman who would take him over. The reason was that they wer…
There is an older girl living upstairs from me who is still unmarried. Her father is very open-minded: as long as she is in good health, has a good job and is happy, that's enough.
Don't you understand? Cherish your job and work hard to make money for your boss. Don't complain about low wages and hard work. If your boss makes more money, he will have more children, and the birth rate will be higher!
Express delivery is expensive, don't complain, you can make the frame bigger. In order to pay for the expensive express delivery, I work overtime, and the frame becomes smaller. Then I have to continue working for the rest of my life to make the frame of the express delivery big enough, and my frame will have to wait for the next person's lifetime. I don't know how many points I can get for this …
Fortunately, I found a good job after my internship, and after I became a regular employee, I could save a little every month. But when I think about the many people whose salary is just enough to survive, I feel uncomfortable.
I have a partner, a house with three bedrooms and two living rooms, a job, and I am not short of money. I don’t have high requirements for the gift. For my future, it doesn’t matter how much my parents say. I still don’t want to have children. It’s not because of anything else, but I just feel that when marriage and childbirth change from a necessary condition to an optional condition, having chi…
work about 13 hours a day, and I have to complete the task at night, which takes about three or four hours. I take 4 days off a month, and two days off a year. Annual salary - about 1200. Gains: 2x talent points x effort points knowledge, annual overtime pay - about 3000. Gains: 2x talent points x effort points x -1x overtime pay (≥1000) x 0.002 points of knowledge. [Smile], worked for 12 years, …
By increasing the content of the couriers’ work by adding more regulations, although the couriers’ work pressure will increase, but after seeing this, fewer people will choose to do couriers, and the pressure of competition for couriers will be reduced. This is not achieved by reducing the couriers’ wages. If you don’t do it, there will be others who will do it. [doge] Although I think that incre…
Before I changed jobs, I only made 2,000 to 3,000 a month and worked 10 to 11 hours a day.
think it's a bad thing. Courier boys are already under a lot of work pressure, and they are replaceable labor. This may be just a minor scratch for the company, but it may be a big harm to an employee.
The wages in Anhui are low and the housing prices are high, so people don’t have time to have children. They are busy going to other places to make money. Then those who make money move their household registration out of Anhui to work for high-paying jobs.
Working hard is making money for the boss, slacking off is making money for yourself [doge] Let's slack off together, workers~
I am not an excellent person. When I think about working all day and having to deal with my family and children after get off work, I think I simply don’t have the patience to educate my children. My energy has been exhausted and I really can’t handle the family.
When I was young, I hated children and thought they were too annoying. In high school, I stayed up late because of the pressure of the college entrance examination and my hormone level was low, so I couldn't have my period. I spent a lot of money on treatment for several years but it didn't work. I didn't care whether I treated it or not. Anyway, I didn't want children. After work, I have to work…
However, the regulations for improving services have been issued, but the wages per piece have not kept up. What should the couriers do in a short period of time?
I have done the work of 5 people, and I thought about it carefully. Okay, I will just lie down at home for 5 years. Suddenly I found it easy to find a job, so I think I should continue to lie down!
But the problem is that if the company can let two people do the work of three people, they will not hire a third person. If the work requirements are raised, it will become four people doing the work of six people. What should we do? ?
Let me tell you my reasons. I don't have to worry about the car and house. I have been dating for many years and I am ready to get married, but I really don't want children. Nowadays, jobs often require a master's degree or above. I am 27 years old after completing my master's degree in this major, and this is the case without any delay. If I still can't find a job in the city I like after gradua…
As long as the employer asks me whether I would consider having a second child during the interview, I will definitely not consider it. I just want a job.
When the population decreases and there are more jobs, life will be better if studying and working are not so competitive.
The children of the Qiao family gave me a rough idea of why people had so many children in the past. They could just raise them casually. Those who were capable could pass the college entrance examination and graduate with a stable and good job. Those who were not capable could find a factory to learn a skill and earn a lot of money every month. As long as they were raised, they would get a much …
Salary, housing price, commodity price, life pressure, education, medical care, work and other factors
The National Day holiday is two days off. I will ask for work again after the National Day holiday. I quit.
I work two days and rest two days, and rest during the day and night. It's a 12-hour work system and I get paid 3,000 yuan a month. Indeed, if you don't do it, someone else will. There are no more job opportunities.
I am a foreigner working in Beijing, 21 years old, with a salary of 5500-7000, which is also the salary level of most people. Some people are engaged in the most difficult and tiring jobs, and their salary is not even 4000. Life is really just a state of not starving to death. Most of the salary is used to pay the mortgage, buy cheap clothes, eat cheap, or eat less, just to save the ten or eight …
saw a comment saying that it was no big deal that it was harder before [Tibetan Fox] but now I can't stand even the slightest difficulty. I thought why should we compare ourselves to the worst, why not compare ourselves to primitive people? I just want to live a better life, to have a job I like and to support myself in doing what I like.
In fact, it feels like we used to develop technology to live a good life, so that we and our children would have enough food and clothes in the future, and we would no longer have to work from early to late. Now we find that technology has improved, and we can indeed have enough food and clothes, but employment has instead rolled up. It seems that for the house, for the future children, and for l…
When I was young, I thought it was outrageous that I was still unmarried at the age of 30. Now that I have just graduated and started working, I find that most of my colleagues around me are still unmarried after they are over 30. I am now 21 years old and I don’t even have the idea of falling in love [藏狐] Everything seems normal now [OK]
No dowry, no house, bad job, what's the point of getting married? You must find a rich man while you are young, so that you have the opportunity to have more children! ! If you can't even afford the dowry, you don't even have the opportunity to have children
When I was looking for a job and traveling, I felt that there were still too many people.
If you have a house, a car, food and drink, a stable job, a husband who takes care of the family, and a harmonious relationship with your spouse and parents-in-law who are loving, many people would choose to have a baby (I don’t, mainly because I don’t have the money).
I am a 985 master's degree holder. I can't find a job after graduation this year. I don't want to work at Gree for 5,000 yuan a month [crying][crying][crying] Wuhan is really too competitive
remember reading a report before, about a foreign boss, because he heard that one of his female employees had to work part-time as a nanny after work, he asked her why, the female employee calculated her income and expenses for the boss, and told the boss that she had to work two shifts to ensure a balance between income and expenditure. Then this boss took out all the annual salary of 1 million …
have a house and a stable job. All I need for my partner is to be filial to my parents and not look unsightly. I just have an ordinary face but I still fail in blind dates [Great]
Then, isn't it still the same? Is it easy to find a job? [Speechless]
That's because it's easy for them to find a job, not for me... If I don't roll, what job can I find? [cry][cry]
One generation has suffered the hardships of three generations, and has also earned the money of three generations. If we young people do it, we say we can’t endure the hardships, and if we don’t do it, we say we can’t make money! As human beings, don’t we want to do something and achieve something? Your previous generation has tasted all the good food, good drinks, good housing, good fun and goo…
was born in the 1990s. When I was born, my parents thought that as long as I didn't commit crimes and worked hard, I would be no worse than them when I was in my 20s. Today, in 2021, I think that if I have a child and he doesn't commit crimes, he will not be much better than I am now.
When I was young, one or two bachelors in the village were often criticized. Now, there are dozens of bachelors in the village, including me, but no one criticizes me anymore. When I was young, I often heard the older generation say that many people born in the 70s and 80s depended on their parents for money even though they had jobs. Now, all people born in the 90s depended on their parents for …
For me, the main problem is that I don't know how to communicate with the sexes anymore. I have to deal with work and life. I didn't have time to care about it in the first place, but now that I'm old, I've given up. If necessary, I'll give up the subsequent survival plan.
If we stop involution, things may get worse. The huge amount of work without distinction and the salary is not enough to make a living. A large number of young people on the job have died from overwork. Calcium and vitamin deficiency have made them half-disabled and unable to continue working. In addition, some training courses are very expensive. The gap between the bottom-level staff is filled …
Whether you are successful or not is not up to you. No matter how high you can go, there is a ceiling. Do you believe that you can become a mayor of a city by learning from being an assembly line worker? Or should we lower the standard and learn to become a middle school teacher? Enter the system? Don't be too self-abased, and don't be too confident. The essence of the problem is that everyone ne…
am lying flat. Now I can do whatever I want every day. I don't have to work and I can only eat two meals a day. I live on rent. I learn what I am interested in and make some extra money. I wake up naturally every day and go to timi's struggle. This is life. [doge]
The argument is clear and logical, and relatively objective and neutral. It has been three times in a row, but I personally disagree. 1. The basic point is that the job dilution caused by overpopulation means that one person's job is shared by two people. 2. Most industries have no creative development, which is also caused by the weakness of our real economy. 3. The problem of values is difficul…
In the eyes of Shandong people, only those in the system are considered to be employed, and all other things are considered to be unemployed. [doge]
Don't argue, the main point of the video is how to improve yourself and optimize your work efficiency, not a 100% successful method. Of course, it is possible to jump out of this circle and change nothing, but compared to doing nothing and frowning every day and giving up on life, I think it's a good thing to strive for a better life. As for how others choose, it has nothing to do with me.
College students who can't make a breakthrough are basically approaching their 30s after graduation. How can they change careers in the few years they work? Is it too late to change careers and become a food deliveryman?
There is no point in talking too much. Try to find a good job and then lie down. It is better. I wish you can work 8 hours a day and have two days off in your next life. [doge]
There is another point that I think the author did not mention. The real reason for involution is homogenization. If you work part-time as a columnist, write novels, manage funds, etc. while at work, and this job is not unique to you, then you will not be able to involution, because your own energy is not worth wasting in this way.
Don't date, don't smoke, don't drink, don't gamble, don't whore. Just play games all day, slack off in class, find a random job after graduation, take good care of your parents, eat and wait for death, lie down and relax and be happy
The only way to solve the problem is to not improve. The same applies to children. If they are willing to study, they can study hard. If they are not willing to study, they can just do a job.
Now many people's work does not produce value, maybe this is the key? Even if there are dense employment, it does not have much effect on the real industry [smile]
I graduated from a key university and now I am self-employed. My annual income is just enough to justify my hard work. My wife always asks me a question: Why are you self-employed when you have a higher education than me? I said it’s because there are too many people and I’m not good enough… The essence of education is to select the right people to become tools of social production. If everyone i…
The only job I can find for an undergraduate major like me is 3k/month with no promotion. After I get this job, I feel like I would rather quit
The problem may not be that complicated, and it has little to do with the so-called value-oriented spiritual needs. It is just that there are fewer jobs in society that people are willing to do than job seekers who want these jobs. Now that the economy is still in an upswing, most people can have a job to survive. If the economy starts to decline, then the problem will become more familiar (or ea…
Isn't it contradictory? If we continue to study while working, and everyone continues to study, then won't we start to compete again? It's just like in school.
Is there anyone working in a signal tower or something like that? Try sending a signal to the sun to see if you can attract aliens. [doge]
was deeply troubled by depression in my freshman year. Later, a psychologist persisted for three years and pulled me out. Now when I look back at those young people who committed suicide, I really hope that someone can help them when they are desperate. I hope I can be their hand and help them at any time when they can't hold on. I just want to find a stable job, take out the extra savings to hel…
But in the past 26 years, I found that what I like most is the feeling of relaxation. Eating, drinking, playing, working and studying, sometimes I will naturally want to do one of them. Then after a day or two of enthusiasm, I want to do something else. There is nothing that I love so much that I want to keep doing it.
Love playing games? How many people spend time studying a game mechanism? Studying how to play? Studying evil bugs? I believe that most people's so-called "love" is just a pastime. It is impossible to study games in depth. Most people are addicted to games. If you face games with the attitude of professional game masters, it will only discourage most people. Playing games will only make people fe…
The up master's point of view is positive, but also niche. I am in my 30s. I am at a crossroads in life. Now I am doing a job that I don't like, just to support my family. There are old people and children at home. If you ask me if I have passion, of course I do. But can I give up my current job to pursue my passion? Sorry, it's really not possible. I don't have parents who are officials or busin…
like to study freely and hate exams. I believe that learning should have practical value. I like to know what it is used for and what the principles of implementation are first, and then slowly fill in the knowledge framework. Unfortunately, I have been receiving exam-oriented education from elementary school to college. Maybe the teaching of teachers in small places is not suitable for my wild i…
was deeply troubled by depression in my freshman year. Later, a psychologist persisted for three years and pulled me out. Now when I look back at those young people who committed suicide, I really hope that someone can help them when they are desperate. I hope I can be their hand and help them at any time when they can't hold on. I just want to find a stable job, take out the extra savings to hel…
But in the past 26 years, I found that what I like most is the feeling of relaxation. Eating, drinking, playing, working and studying, sometimes I will naturally want to do one of them. Then after a day or two of enthusiasm, I want to do something else. There is nothing that I love so much that I want to keep doing it.
Love playing games? How many people spend time studying a game mechanism? Studying how to play? Studying evil bugs? I believe that most people's so-called "love" is just a pastime. It is impossible to study games in depth. Most people are addicted to games. If you face games with the attitude of professional game masters, it will only discourage most people. Playing games will only make people fe…
The up master's point of view is positive, but also niche. I am in my 30s. I am at a crossroads in life. Now I am doing a job that I don't like, just to support my family. There are old people and children at home. If you ask me if I have passion, of course I do. But can I give up my current job to pursue my passion? Sorry, it's really not possible. I don't have parents who are officials or busin…
like to study freely and hate exams. I believe that learning should have practical value. I like to know what it is used for and what the principles of implementation are first, and then slowly fill in the knowledge framework. Unfortunately, I have been receiving exam-oriented education from elementary school to college. Maybe the teaching of teachers in small places is not suitable for my wild i…
You didn't jump out of this [pouting], which is equivalent to saying that as long as I don't define my behavior as being unruly, then it's not unruly. Does loving something and being willing to work hard for it not count as being unruly? Besides, how many young people in this society really know what they love, and how many young people have an environment that supports them to do what they love?…
Before the college entrance examination, I just wanted to get more points. After I took the exam and chose my major, I realized that I was confused. I didn't know what major I wanted to choose. My parents asked me to study at a normal school, but I didn't listen to them at the time. I chose electronic information engineering. Then, I started my college life. Facing the complex Tongji seventh edit…
Loving an industry may not necessarily bring happiness. The industry I loved forced me to resign. But I didn’t learn enough in the industry I loved, and I wasn’t competitive enough, so I lost my job. I love it, but it pushed me away. Loving a job may not make you happy, because people are divided into smart and stupid people, and I happen to be not smart. Listen to me, it is more important to fin…
Lying flat: refers to spending the time that others spend on work on something you love [doge], which is a synonym for mooing
can only say this: I have loved painting since I was a child, and now I am majoring in animation. I received an offer for game original painting before, but I rejected it because through previous internships, including several sets of test questions I did, I felt that my love for painting comes from the fact that I only like to paint what I like and want to paint. Every time I paint things that a…
If you take something you love as your career, it won't be long before you start to add utilitarianism, anxiety and other things into it. Slowly, you will start to hate it and look for the next thing you love.
have a little suggestion on finding something you like. That is to try to find something you have talent for and are good at. For example, Wei Shen reached the first team after two months of playing lol. If you have this talent, of course it is easy to love it. Because your efforts are visible, it will continue to bring you a sense of accomplishment, so of course you can stick to it. Some people …
When a hobby becomes a job, even if you love it, it will fade away.
I tried the third way mentioned by the upvote, and I was very anxious when I found that I couldn't find a low-level job to do what I wanted to do. Although I found a job after changing my career direction, I no longer felt that I had spent all my savings on what I wanted to do. Then I gave up the offer I got and started thinking about what I wanted to do again, and then, I stopped. Maybe I should…
I want to be a chef, but when I filled in the application form, I filled in the mining industry without thinking. I was really upset. I had no interest in this major in my undergraduate studies, and finally found that I couldn't find a job I liked, so I took the postgraduate entrance examination in my school. Now during my postgraduate studies, I went from having no interest in this major to hati…
There is another way. Find a big goal or recognize the meaning of life. Then your current job is just a tool to achieve the big goal. The key to tools is to make them easy to use. Compress a few years and polish the tools until they are absolutely easy to use. You are polishing them for the big goal. It is also driven by your inner self and is not disturbed by internal competition.
When a hobby becomes a job, it is no longer fun.
If you turn a hobby into a job, you will lose the hobby [tv_roll eyes]
I like work, but I don't like marriage and the pressure of raising children. Work is a part of my life, but love has long become a choice. I will only choose this when my own situation and environment allow me to gain more benefits. I don't want to live for others all the time, I just want to live for myself.
But I am afraid that if I put all the pressure of life on my passion, my passion will dissipate. For example, I like history, but if I read historical documents every day, I will feel bored. For example, I love playing games, but if I make playing games a job, I am afraid I will never want to play games again. Of course, I still agree with what the up said, but I just want to add that passion sho…
Any hobby that turns into a job is boring.
It's true, I'm 25 years old, a voice actor. Although most people around me are talking about involution, and looking at themselves with an extremely pessimistic attitude, my own life is not very smooth, and when the work period is busy, I will stand in the studio until after 10 o'clock in the evening, but I have never been pessimistic about my career and life. I love being able to dub my favorite…
It is very difficult to find something you really love. I used to like watching anime, and now I am a 3D animation designer. I still like watching anime, but I don’t like this job, or I just don’t want to work... Some people like playing games, but when they become game anchors or professional e-sports players, they will find that they don’t like playing games that much... Many things you like, o…
I like programming and taught myself Java, but now the Internet is in a cold winter, and no matter how capable I am, I can't solve the problem. I want to take the postgraduate entrance examination, but according to the current trend, I can't find a job. It seems that I can only take a few years to get relief. I like law and plan to take the master's degree in law, but now all liberal arts student…
Up didn't make a point. Most Chinese people like to succeed in one go, such as the iron rice bowl and golden rice bowl in the past, and the civil service examination and postgraduate examination now, but ignore the continuous accumulation in life and work. Fan Jin's success in the imperial examination is a very appropriate irony now.
I want to say that most people can't find what they are passionate about. You ask them to play, but they won't play well. How many people are willing to study games? Yes, they now make millions a year. How many people watch anime and try to review and edit movies? Yes, they are now the up-and-comers on Bilibili who can at least make a living. But there are only a few of them. At least I passed th…
study for more than 6 hours every day now. There is no other way. I can't catch up with the top student in the dormitory. He comes from a very good family, but he can study for more than ten hours a day. I have been admitted to Southeast University's communications major as the top student. I just want to be admitted to Southeast University as a graduate student. After all, it is easier to find a…
I have always liked medicine and wanted to be a surgeon. I like it and it has considerable social significance. But I didn’t get into a good medical school in the college entrance examination, and I was afraid that I wouldn’t be able to find a job, so I studied automation. After I started working, I quit my job to take the postgraduate entrance examination. At first, I wanted to study medicine, b…
don't know if my colleague loves his job very much, but he is the king of involution. Without the boss's order, he volunteered to work overtime for free during the Mid-Autumn Festival and National Day, as if the company couldn't function without him. So, do you think this kind of person really loves his job? Love it so much that he can give up his rest time and his family? Isn't this called invol…
But if you treat your passion as work, will it no longer be passion for a long time? (Although I am also young, I think that if you are always passionate about your work and career, you will get tired one day. If you can't find a new passion, you will feel empty. Balance is the best. Many middle-aged and elderly people say that a plain life is the best, which is true. But if you are young, you sh…
When my hobby becomes my job, I am not as happy as before, but at least I have a direction and motivation.
There are only three kinds of jobs in the world: one is the job you like, one is the job you hate, and the other is the job you neither like nor hate. Most people just haven't found the direction.
I like writing novels and editing videos, but I'll starve to death if I do this kind of work.
Facts have proved that habits can really change a person to a certain extent. As an art student, I don’t know if I am good at drawing or not, but because I have learned it before, I let myself draw when I am bored, and suddenly I find that it is not bad. Games are indeed entertainment, but sometimes sleeping alone cannot relax the mind. There is basically no pressure on work. After all, I don’t w…
Most young people (who have just started working) have passion for something. They have not been worn out yet. If they have an idea, they will do it. Their family, society and self do not have any material or emotional requirements for them, such as a decent job, urging marriage, a house, a car, etc. However, this free time is short. Most friends who have been working for more than five years and…
Learning is for knowledge. Learning cannot have a purpose because learning is endless. Learning should be pure because knowledge can bring us spiritual fulfillment. Many people think that learning is hard because they don’t have something they love. As long as they have something they love, they will naturally spend time on it. After spending time, their abilities will be improved and their grade…
It's really true. I have a friend who I have been friends with since childhood. He heard that learning auto repair has a future, so he went to learn to repair cars. After graduation, it was difficult to find a job. After working for a few years, he found it difficult to get promoted, so he opened a car repair shop. Every day, besides washing cars, he repaired and maintained cars. I asked him, do …
Video summary: Find something you like to do, so that no matter what the result is, it is your own will, and you will not and cannot blame anyone. Risks: The work you love may not make money, may not conform to other people's values, may not make you stand out, your living standard may not be very high, or even decline, and you may not be able to afford a house or get married in your lifetime. Re…
I just like to play, and the things I like to play have nothing to do with my major. My ideal state is to work when I should work and play when I should play, without interfering with each other.
So, here comes the question. I am a student of art normal school. I like art very much and I also like children. I will live happily if I teach children the art I like. I went to education training to be an art teacher, but I can't make money from this job. People around me said that I should do things that make money and compete with others. I don't want to. I said I just want to do what I like …
really don't know what connection there is between what I love and my job. I like reading books, listening to music, watching movies, pets, and helping others, but what is the connection between them and my job?
Let me tell you about my father's experience. My grandparents were workers in their early years. After the reform and opening up, they started selling clothes and doing small business. My father grew up in the county town when he was a child. But he was a good student. He ranked third in the county (about 5,000 students) in the college entrance examination and was admitted to Harbin Institute of …
What should I do if my passion for hobbies and interests has decreased after they have become jobs?
There is a situation: in order to survive, you have to spend your time on boring people and work, and have no time to participate in your own passion! What should you do?
I like makeup work as a makeup artist! Colorful makeup~ I hope I can be a makeup artist~
For most people, when passion becomes work, it is no longer so passionate. What prevents passion from being transformed into long-term persistence and ultimately into achievement? In fact, it is the lack of courage and perseverance. And an ironic fact is that courage and perseverance often come from the experience of involution. Only by involution can one stop involution. Freedom comes from self-…
There are many things I want to learn, and they are all art-related. If my family had money, I would definitely want to learn painting first, but my family conditions do not allow it. Then I was very confused for a while, and then I thought about it for a long time. In the end, I looked at graphic design, e-commerce, photo editing, and photo studios. I think I am interested in all of them. Later,…
am very interested in games, so I learned 3D modeling and worked in the game modeling industry. However, it is really difficult to make a living with a monthly salary of four or five thousand in a small city. I changed jobs early and tried the short video industry. Although I didn’t do very well, I also got tens of millions of views and millions of likes. But when I returned to my hometown, the c…
That's very well said. I am a person who works for my interest. The promotion and wealth that others pursue have nothing to do with me. I just do my job well and I am the happiest person in my unit. Those who understand this principle will understand it. There is nothing you can do if you don't understand it.
There is one point where a subversive mistake has occurred. In most cases, passion cannot improve one's skills so that one can stand out competitively. Passion is an attitude, and competition will inevitably lead to involution. The root cause of involution is competition, and the scarcity of resources is a natural attribute. Not being happy with things or sad with oneself is the real effective me…
How to relieve worries? Only passion. I grew up in a poor family, and I didn’t have the opportunity to deeply contact new things. My parents also instilled in me the concept of thrift. Now that I have grown up, I can do nothing but thrift. I get tired of changing jobs soon [sour]
[Laughing and crying] This view is not applicable to all industries. I am currently engaged in architectural design. I love my work, even if it is to draw the most mechanical drawings. But I cannot accept frequent overtime work. I am always worried about whether I will die suddenly. I love my work, but I love life more [crying with joy] 90% of the companies in the entire industry are like this. H…
I couldn't sleep after listening to it. I fell into thinking about life, and then it branched out and triggered thoughts about life, work, and emotions...
To be honest, I feel that the most difficult thing is to find what you love. For me, for the majority of people who don’t know what they love, the most important thing is not to think hard about what they like, but to do their best to do the things at hand, try to seize most of the opportunities that can be seized, and try to "connect" your major with the field you may like, so that when you sudd…
agree that you should find something you love in life, but I don't think you have to make a living by doing something you love. As long as you have a passion and a goal, you can try various methods to improve yourself for what you love, and get a moment of freedom in your passion. It is also great to get a break and rest in life. I worked in Guangzhou for five years. In the second year, I came in…
The third way is pure nonsense. When a hobby becomes a job, you will lose the hobby.
If your hobby becomes your job, that is happiness.
I used to have an obsession with passion, always thinking that I must find a career that I love and work hard for it. Every time I encounter a career, I will ask myself if it is really what I like. As you can imagine, I haven't found it yet. I am a counterexample, because I have elevated "passion" to such a high level that I can't keep my feet on the ground. After working for a few years, I found…
Yes, because of the materialistic society today, many of the choices we make are based on money (or survival, and more enjoyable survival). We study not to increase our knowledge and insights, but to get into college and not be eliminated; we choose majors not to consolidate our interests and hobbies, not to get to the next level, but to choose a better job in the future; we choose a job not for …
Playing games is just a way to kill time and seek pleasure in the virtual world. People who really love playing games would even treat gaming competitions as a daily job.
am 19 years old this year. After the summer vacation, I will be a sophomore. I am a low-ranking student in a low-ranking 211 university in Jiangsu. I had no spiritual freedom in the 18 years before college. From childhood to adulthood, I have always been a learning machine that works steadily under the arrangement of my parents and teachers. In the past year of college, I have come into contact w…
don't agree with that. I think Banfo said something that makes a lot of sense: once money is involved in something you think you love, you no longer love it. Because work must be utilitarian. The process of pursuing maximum benefits will definitely make an interesting thing boring. These two are contradictory.
told my mom that I wanted to do what I love in the future. My mom said that most people in this world do things they don't like. I said that I wanted to study my favorite major in college and find a job I like after graduation. My mom said that many people can't study their favorite majors, and that it's not necessarily easy to find a job with your favorite major. Isn't the purpose of going to co…
Hobbies are the last thing you can treat as jobs or careers. One is for fun, the other is a product of worldly compromise. Turn what you are good at into work, and turn what you can get pleasure from into a hobby.
Well said, passion is the best teacher! ... Many of the top students around me have given up after work... Because it turns out that learning is not passion, but the result of being pushed by parents, teachers and themselves.
I wanted to stop working, but if I didn’t work I would die. I loved living, and I didn’t want to die, so I gave up the idea of not working and loved living, and then I died [tv_鬼脸]
I feel a little numb now. I go to work at 10 o'clock every day and get off work at 9 o'clock. I don't want to play games when I go home. I just want to lie down and rest at home on weekends. . I am now struggling whether to change to an easier job [spicy eyes][spicy eyes][spicy eyes]
Up is wrong. Involution refers to ineffective competition where input and output are not proportional. The key point is: ineffective competition, which is different from healthy competition. Take the example of the nationwide tutoring. It is useful for some children and not for others, but there is no way out and everyone is forced to take it, resulting in involution and a waste of resources. The…
To be honest, at the age of 25, I still don’t know what I really love. I envy those who work on something they really love.
think passion is a state that will change. If conditions do not allow, it is important to learn to love your job, unless you hate it from the bottom of your heart. Just like falling in love, you don't have to find the perfect match, but based on your own objective conditions, you should choose someone you like and don't hate, and manage and maintain the relationship well. After getting along for …
It means that we must cultivate them in different ways, some of them like money, some of them care more about dignity, and so on. You can't have a job that is both respectable and easy and that pays a lot. Resources are limited, so please allocate them reasonably. But as a species, we must have commonalities in genes, and tend to prefer certain things, such as laziness. Then who will make sacrifi…
Of course you can do what you like, but the prerequisite is that you have to have the ability to support yourself. If you like painting, editing, writing, designing, etc., these are things that can be quite creative and productive, and they can indeed become careers that can support yourself as you continue to develop. Even if you can't rely on these to support yourself completely for a while, yo…
Located in a large northern city, the price of hardcover in remote areas was 16,000 in 2020, but now it is 20,000. It is becoming increasingly difficult to find a job, and the salary is lower than before, only the housing price continues to rise sharply.
Is there any job of brushing B station that I really like from the bottom of my heart?
Up's lecture was very good, I would like to add one thing. Many people have their own passions, but there are also many people who have no passion for their careers and only like to enjoy themselves. If you find that there is no major that you like, this is also very normal and it is likely to happen. The data support comes from some career planning surveys in Europe and the United States. The ge…
Thank you very much, Master Uploader. Actually, I already had this idea in my heart. I thought that I must do a job that I like in order to live a better life. But it was still a vague, wavering and uncertain idea. After watching your video, I became more determined in my inner thoughts. Thank you very much. The only way I can give back to you is to add three comments to increase the income and p…
I quit my job after earning some money ten months after graduation. Before I quit, I hated the day-to-day work and couldn't stand it even for a moment. I wanted to quit as soon as possible to find what I loved, but after I quit, I just lay down at home. Although I don't regret quitting, I always feel that it was a bit hasty. Maybe I should wait and see, but I feel that having a way out will make …
It is so tiring. I can’t find a job, I can’t finish my studies every day, and I can’t do my graduation project.
When I was a kid, I loved painting, but to be honest, I didn’t love it so much. Later, I studied a related major and worked in a related field after graduation. Many of my classmates changed their careers for various reasons. Now I don’t have the same passion as I did back then. But I still don’t hate it, I still like it, but the passion will fade away over time. Sometimes I am glad to do what I …
Let me tell you my story. I am an ordinary person. I have things I like, such as badminton and painting. I also used the trial and error cost of age to try to turn what I like into work during the corresponding period, but I found that I didn’t love it when I was working. Later, I accidentally did administrative work, and I found that I didn’t like it very much. Later, I found that I also like hi…
We only have one legal way to get back at our boss, which is to work harder and make him happy. [OK]
If you use your time and energy to learn what you love, and what you love may not necessarily be your talent, but also detours and other things, you will have succeeded long ago. Do you think that you will definitely be able to get along well in your city if you find your passion? Maybe you will find it more fun and less boring when you work. I still think that the six years of hard work in junio…
But I am afraid that what I love will become a job and I will no longer love it.
Lying down requires money. How do ordinary people make money? Work. If you don’t save money from work, you will have no money. If you have no money, you can’t lie down. This is a cycle. If you want to lie down, work hard to make money and save money.
I like beautiful girls. Can any brother recommend a job where I can play with beautiful girls?
I have been working for five years and I want to change my job and environment. I hope it is not too late.
The essence of your work is to meet the needs of others, but what you love may not be what others need. Isn't this just self-admiration? What if you love something and do it well? The so-called consensus, I think, may be the biggest overlap in most people's needs.
Come on, work hard. Next year the boss will buy a new car.
I feel that what the UP said is wrong. If a person likes games, he can play a few games every day when he wants to play, and he will be happy every day. But if his job becomes youth training, and he has to play games every day with high intensity, I believe no one will like it anymore. It's the same as being a porn appraiser. When something becomes a job, it is no longer loved.
Emmm, in fact, there must be a prerequisite for finding passion, that is, you must have a certain reserve that allows you to slowly find passion. Before that, you find a job that you like, but you have to give up because of the industry and market profitability. Some people will say that it is because you are not working hard enough, not persisting long enough, and not climbing to the top. But cl…
No one will be passionate about work, even if it's playing games! No one can be passionate about work! Because it's work, you have to work hard to make money. How can people be passionate about it? Work is forced, play is voluntary, I think no one works voluntarily, right?
In fact, work is not just about going to work in a company. Working for yourself is also work.
was a good kid and a good student from an ordinary family under the college entrance examination system. When I was filling out my application, I realized that I didn’t know anything. I was confused. Now I am a graduate student. I have no talent and have been frustrated all the way. Now I am about to graduate and find a job. I am quite anxious. I remember that my childhood dream was to be a fashi…
don't think there is any kind of competition. Who can define the boundary between benign and vicious competition? Take academic competition for example. I focused on the realization of my self-worth and the pursuit of my life ideals, but others were admitted to good universities and I was not. At work, I focused on the realization of my self-worth and the pursuit of my life ideals, but I did not …
I just want to find a stable job that is not prone to unemployment [crying]
loved reading when I was a kid, but I lived in a remote town. I borrowed novels from my classmates when I was in junior high school, read some Western novels in the library of my high school, and only read some Western novels in college. After graduation, I had a very miscellaneous job. Every day, I worked overtime except sleeping. I never found something I was passionate about, but I just found …
Now I have chosen electrical engineering and automation, and last year I was recruited by a state-owned enterprise for a small hydropower plant. I wanted to play games and do live streaming, but my family wouldn’t let me. Now I don’t have any goals. I go to work when I should, go home when I should, and listen to my boss. I play games after work, and I don’t have any motivation to do live streami…
am also extremely lucky to be doing the job I love. As a freelancer, I am neither involved in the internal competition nor lying flat. I move forward at my own pace. In fact, the reason why I am not so anxious is that I am really grateful to my parents for giving me a good material foundation. I basically don’t have to worry about food and clothing. In a first-tier city, I only think about how to…
have read all that has been said. These principles are not suitable for all people. First of all, one must have a superior family environment. The superior here does not refer to the second generation of rich people, but to those whose families have allowed them to go to cram schools or interest classes since childhood or whose families travel frequently. Only people of this type and above have t…
It doesn’t matter if you are passionate about it, work hard, or achieve results, but the boss will say: You are not suitable for us here (because you don’t fit in. If you encounter this a few times, you will find that you have no money and can only be forced to fit in [eye-catching])
You are doing a job that you love, but the content of this job is not decided by you, and you are even required to do things that are contrary to your expectations, which is bound to erode your passion.
What should I do if I like the mindless assembly line work...should I quit my job and go work in a factory just because of my interest?
I wanted to study painting in high school, and after graduation I worked as a mechanical draftsman. Although it was a little different, I was still quite interested in it. What I learned in school was just the basics, so I still had to rely on self-study when I graduated.
Can you find me a job?
In a word, people can hate going to work, but they must love their work.
Only talking about personal consciousness without talking about material foundation is chicken soup. All the hobbies you love, let alone how to find them, just maintaining your love requires material support (even the lowest level of expanding social circles requires time and food money). And how do you get the material foundation? It is not obtained by lowering your personal desires, but you nee…
In my senior year, when I had to start working to earn money, I gave up all my experience and achievements in my previous professional field and plunged into the field I love, starting from scratch. I hope everything goes well.
Not all passions will be recognized by the market. Not all passions can still be loved after becoming a job. Just like I really want to farm now, but if I quit my job and go home to start farming, I might be so tired that I want to go to work...
feel like I don't like the job during my internship at a technical secondary school, but I can't say I hate it either. I want to go out and find a job I like, but my parents don't understand and think it's nonsense. And now I can only do a job I don't like because I'm too confused and don't know what kind of job I love.
Everyone knows that they need to change, but how to change specifically? Success psychology: There are some specific steps to discover the meaning of work and life (success is a process, not a result), so that you can understand the general direction. The real landing requires your own efforts + practice. If you know that your life will definitely be a tragedy, do you still have the courage to li…
In fact, it is difficult to find passion. This video is like answering the question of how to put an elephant in a refrigerator, parallel transfer of the problem. Passion, good at, and making money. If you have two points in an industry or profession, you can move forward. A job can make money, and the other one of passion and good at can keep moving forward. If you are passionate about something…
Having said so much, in fact, many people don’t know “why should I study” when they are in school. The answer is basically “making a lot of money” given by their parents. But when you start working, you will know what you like. When you want to change, the time cost or other costs you have to invest are much higher than others. At this time, you have to reflect, struggle and hesitate. And what yo…
love animals. Should I give up the opportunity to study for a C9 graduate degree and work in a zoo?
Go find a job, follow your instincts, try any profession, don't aim to make money, just see the world, and you will find the answer.
Workers, scientific researchers, professors, chefs, all kinds of professions are needed by the country and society. If everyone loves movies, music and games, and pursues their own passions, it is nothing more than changing places to continue rolling. What you love may not necessarily have a market. So many young people like to play games and music, how many of them have made it a profession? Som…
Without sufficient financial reserves, everything is empty talk. You still have to find a decent job first and save a certain amount of money before you talk about your passion. I think it is unrealistic to create on an empty stomach when you can't even afford to eat.
Whether it is involution or lying flat, they are both ways of seeking self-worth outward, and most of us go with the flow throughout our lives. The education we receive, personal cognition, and social atmosphere cannot enable us to develop comprehensively physically and mentally. We do not understand ourselves, nor do we understand the world. We are so narrow-minded and insignificant that we cann…
The previous analysis of involution is very good. Some of the things you love (ideals) in the latter part require talent. Without talent, the road will be very difficult. First of all, I have to ensure the survival of my family. Ordinary people have no tolerance for mistakes. They may not be able to turn over after failing once. It is right to seek change. I am also seeking change at present, but…
If I find my passion, but this passion requires a lot of investment, and I don't have the money. If I change my career directly, I can't make a living in that industry. If I don't change my career, I can have a painful but ok job. Now it's very painful, leaving means poverty. I am sure that it is my passion, I am more miserable than those who are just unhappy at work, I hate every minute of overt…
can't find my passion. I used to think I liked playing games, but after I started working I realized it was just a pastime.
It doesn't matter. I have been looking for something I really love since high school, but I found that no matter how much I love something, I will get tired of it if I do it too much. Work is just repetitive, so I finally found that there is nothing I love. It's like asking you to choose your favorite job. In fact, my favorite job is not working [laughing and crying]
This is very close to my thoughts. If I saw this when I was 20, I would have devoted myself to the industry I love without hesitation. However, when I figured it out, I was already 27 or 28, and I didn't have that much courage. Besides work, I also have a life. I hope that young people who see this video can find the career they want to devote their lives to as soon as possible.
What you said is indeed very reasonable and beneficial. I have been involuted and lying flat. Now everything is arranged to find a job that suits me! Everything is changing. Since I can't change the world, I will change myself! To realize my self-worth!
I am now trying to make myself love my job
want to tell today's kids: 1. Being a professional player is not about playing games. Working in games is just work. If you really like games, then you can try to farm soldiers all day long, or snipe against AI all day long. And it doesn't mean you can become a professional youth trainee after training for a year. There are more training methods than just this. 2. Don't learn computers. Computers…
You are right. I like models, but I am already studying medicine. I hate medicine and the words in the textbooks. They make me sick just reading them. The postgraduate entrance examination will be the last one in my life. After I pass the exam and find a job, I will just lie down and rest.
like learning new things, especially electronics, AI, operating systems, etc. Besides, my job does not conflict with my interests at all. Almost every day I can't help but pick up a book to study. So involution, 996 is just a daily routine for me.
up, I have just entered high school. Although I know what I like and what kind of job I want to do in the future, my grades are not good. If you don't have good grades when you go to college, what you learn may not even be enough to support your family. In the end, you will feel that your job is becoming more and more tiring and you will start to hate it. What should you do in this situation? Sho…
When I first started working, my boss always told me to be happy at work and have a peaceful mind. I found that what you said is very consistent
Involution is really too serious. In the past, everyone had a university degree or a technical secondary school degree, but now everyone has a postgraduate degree. . In the past, the hot search on Weibo was the summer schedule of second-grade and fourth-grade primary school students. They all signed up for extracurricular classes. Even I, a primary school student, felt that there was involution. …
Up's analysis is pretty good. But I firmly believe that you shouldn't treat your passion as a job [irritating] because working will consume your passion. What you are passionate about is more suitable for a career, such as starting a business/part-time job. You must be able to control the pace so as not to exhaust your passion. So my compromise is to find a similar job to make a living first, and…
Maybe I just like that relaxed state, the feeling of working hard, and the excitement of being recognized by others. In the past 24 years, I have thought countless times that I have found what I love: writing, singing, computers, badminton, swimming... many, many things, but when they are a hobby, I will be happy to accept them. But if I want to treat them as a career or a job. My mentality will …
don't think that something you love must become a job. For example, many League of Legends players have changed their attitude towards games from love to disgust. I think that young people's work should be in line with the needs of national policies. Look at the 14th Five-Year Plan, that is the right path. After all, love is something mysterious. For example, the creation mentioned by the up is l…
[Tibetan Fox] Take a journey to find yourself. ? Prerequisite: When you gamble on this, you must be alive. In this fast-paced society, many people work not for living but for survival. How much cost and time are allowed to find yourself? Abandoning the comfort zone to find something with unknown time and result. Who can persist for a long time? Do you dare to quit your job to experience life or f…
agree with most of the previous views, but I disagree with the third way given by the up master. People are social beings. You can endure hardships for what you love, but you are not a completely independent person. Your parents will eventually grow old. Can you really shoulder your responsibilities as a father and a son in the process of pursuing what you like? Can you play the role of a child a…
I want to finish my studies and work until I’m 30, then find an old street with someone I like and open an affordable sandwich shop (I’m pretty good at that).
If you want to see whether you can persist in your passion, then I suggest you set a favorite song as your alarm and ringtone, and keep using it for a long time. If you don’t get tired of it after about a year, or feel uncomfortable listening to it, then you can persist in your passion. Many people can’t turn their hobbies into work, and in the end they lose interest.
I have been working for a year and I don't feel satisfied with my job. I want to quit. I also found that the major I studied is not very good. Now I am confused and don't know what to do. I have no dream and spend my days playing games. [Sad]
Just do what you want to do, work, do your own thing, and make life convenient for others.
Is this kind of chicken soup argument from a few years ago still outdated? Let me ask you a question: you like traveling, can traveling become your career? You like food, can you become a gourmet? You like playing games, can you become a professional gamer? You like playing basketball, can you join the national team? Maybe some nitpickers will come out and ask why not, I tell you, yes, it is poss…
You actually lied down. The third way is to learn foreign languages well, and then find a way to go abroad to work. They are all the same, but the welfare abroad is better. My cousin graduated from university and went to Sweden through connections. He did the kind of low-level job that Swedish people do (easy) and earned more than 20,000 yuan a month.
This theory is narrated from a male perspective. It is difficult to balance a woman's career development because of restrictions on marriage and family.
If your current job is good enough for rest, don't think about changing jobs.
When passion becomes work, will you still love it?
Once anything you love becomes related to work and money, it is easy to get bored.
With five years of solid work experience, it is quite possible to switch to a top company in the same industry. Personal ability is very important.
I don't want to be like this, but when I turn my passion into a job, it becomes a new pain for me.
My current idea is that while I am young, I might as well try more and make more mistakes. It doesn’t matter if I succeed or not. If I start working at the age of 30 and don’t have the opportunity to experience what I want to do, I think I will regret it to death [OK]
Another point is that this world is all about results. Likes and dislikes are just emotions, and results determine the meaning. So even if you don't like it, if you work hard, the 30,000 days of your life will not be meaningless.
am more pessimistic. I don't think most people have what they love, even if they try hard to find it. If he is a person who is used to walking on the shore (lying flat), then even if he goes into the water many times to look for it, even if he reads everything, he will feel that what is underwater is not as good as what is on the shore. Most people pursue worldly things, such as money, houses, an…
I love freedom, but freedom won't bring me a penny. For my love, I am willing to give up opportunities and money. I dare say that most of the love is contradictory to the reality of working and making money. There are many people who love money, but they love the result of getting money and what money brings, not the process of making money. I dare say that less than 10% of people truly love the …
have never liked to think about money since I was a child. If I don't like it, I won't learn it. I like translation. Now I have graduated from university and have translated 200,000 words. I plan to take the translation major in the postgraduate entrance examination. On the one hand, I like it, and on the other hand, I don't know anything else and don't want to learn it. I want to do what I like,…
After watching UP's video, my thoughts and ideas are the same as when I just graduated. Knowing the world and knowing yourself, and knowing your love for things requires practice and time. If you don't have enough food and clothing, you have to make a lot of trial and error to make a living. To be honest, it's not easy. Work has left me with less time to think and try and make mistakes. [rolling …
The third way is to work hard and live well
loved animation when I was a kid. When I was in the first grade, I copied Fullmetal Alchemist and other things. I didn’t have any knowledge, but I just kept drawing. When I grew up, I realized that I was a useless person who could only copy. Although I am still doing animation-related work now, I can’t find the feeling I had when I was a kid [laughing and crying]
Not everyone is lucky enough to find something they love. Most people just work to survive.
I love programming and typing codes. But my job is a small employee in the marketing department. It is difficult to have both passion and work.
very much agree with the point of view in this video. For me personally, when I took the college entrance examination, my family asked me to go to military school. I have loved painting since I was a child. I argued with my family, but they finally couldn't persuade me and asked me to leave the training. After half a year of training, I passed the art exam as I wished and applied for the painting…
Just listen to it, and choose your own path. If you love your job, you need skills and a market for it. I love frying fried yellow rice, so where is the market?
I don't like or hate my current major too much. My passion is to pursue happiness. While working hard to do my job well, I can feel happy and responsible. I don't study to surpass others, but only to make myself happy [OK]
I found one. But I can't do that job. Because my major is not suitable. I don't have enough experience.
When your parents lose their ability to work, are still unmarried, and still need to buy medicine for a long time, how can you not work hard?
What if I don’t like working and just want to lie down? What should I do if I can’t find a job I love?
You never need anyone to nag you about the things you like. The hard part is how to turn something you like into a career. I told my boss about this when I asked for my resignation. He said that your idea is immature. You should slowly turn your work into your hobby. . . . . . Right, right, that's right. I'm going to fuck you.
What I love is learning the knowledge I want to learn, but can this become a job...?
It's obvious. Now it has become that you should not do the job you are interested in, because that will only turn your hobby into the thing you hate the most. Indeed, whether to work with interest or to make money with interest, this is the second dimension.
I changed companies, same job but different intensity. In my previous company, I got off work on time and completed my tasks at work. But this company has performance KPI and effective time limit. You have to work within a few minutes and cannot take a break. When you take a break, the supervisor will remind you... I have to find someone to take my place when I go to the toilet. I am a real inter…
Do what you want to do and create value. Now I think this is the life I desire. However, the things I like and the things I hate are tied together, and reality does not allow me to have this kind of personality. Well, let's settle for the next best thing. Even if it is not natural science, engineering and hands-on, I still like it. If I can't do scientific research, I will learn technology. That …
like sociology, but I feel like I can't find a job.
Many people say that they don't like their work anymore after it becomes a hobby. I can only say that it is not a real hobby.
I think the idea of passion is right, but for most people, it is difficult to choose a major they love when filling out their college entrance examination applications, or they just heard that the major is very good, etc., so most people did not find what they love in the application process, and then it was difficult to change their major in college. After graduation, they found a job, but found…
What about people like me? After finishing compulsory education, getting a bachelor's degree and a master's degree, and working for a few years, I still don't know what I love. I always treat things I don't want to do as things I should do, and I am forced to believe that only by doing what I should do well can I do what I want to do and like to do. What should I do now? I am too stubborn at work.
Conclusion: Doing a job you are passionate about will bring you unlimited future opportunities. Reason: When you find a job you are passionate about, you will naturally delve into and practice your skills, and then your skills will inevitably be improved to a fairly high level, and then you will stand out and be recognized by the market. In this virtuous cycle (as determined above), you will make…
It's very strange. I feel like I can still do the jobs that require a high school diploma even if I dropped out of junior high school. There are also many jobs such as painting, design and various other industries where companies have to set a threshold for recruiting people, namely, academic qualifications. It's really inexplicable. Instead of looking at the ability first, they look at the acade…
What's the point of doing this? I'm just working hard. Let me do more. Yes, yes, yes.
friend who grew up with me likes to draw. She took the art and sports major in the college entrance examination, but her grades were not good, so she was admitted to a junior college and did not even get into the animation major she liked. But I could really feel her love for animation. After graduation, I saw that she was confused for more than a year. After returning to her hometown, she did a …
love the old man's ring. I run there as soon as I get off work on Friday, get home, have dinner at 8 o'clock, and work until 7 o'clock the next morning when I couldn't bear it anymore and went to bed. During this time, I didn't move except smoking, drinking water, and going to the toilet. Time flies. What kind of job can make me like this...
Scores are actually intelligence x hard work. Once you start learning complex high school content, you can't learn it just by being smart without hard work. Getting into a good school and having a good degree is a proven way to really have a chance to change your future destiny. However, as a student, I may need to start working to truly realize this. After all, you have to walk your own path. I …
When I was a student, in front of others: I never studied and just took tests. Behind others: I worked hard to maintain my current grades. Online: No way, how can I survive with only 10,000 yuan in salary? Reality: [kneeling] The first step to becoming strong is to admit that you are weak now.
The current physical industry is in the same situation. Take my family as an example. No one wants to do manual work, so everyone invests in bigger machines. However, the more you invest, the smaller the return. A machine costs more than 1 million yuan, and a second-hand one costs more than 400,000 yuan. Working 24 hours a day may only make more than 10,000 yuan. It will be even worse when it enc…
The current physical industry is in the same situation. Take my family as an example. No one wants to do manual work, so everyone invests in bigger machines. However, the more you invest, the smaller the return. A machine costs more than 1 million yuan, and a second-hand one costs more than 400,000 yuan. Working 24 hours a day may only make more than 10,000 yuan. It will be even worse when it enc…
Your understanding of involution is that "it has become slower and harder for people to improve themselves, and to increase their income and status." However, netizens understand involution as "the competition for survival has become increasingly fierce." For example, someone with a monthly salary of 10,000 yuan may feel that it is difficult to earn 15,000 yuan a month and that is involution, but…
What is involution? It means that before the cake gets bigger, the number of people trying to grab it increases. In terms of job hunting, it is like making nuclear bombs during an interview, and screwing screws after entering the job, and there are seven or eight people competing for this job.
As a doctor working in a hospital, I went to the interventional department to ask. The price of a stent that cost RMB 13,000 has now dropped to RMB 700. How do you expect the doctors who perform the surgery to make money? The equipment vendors simply don’t use the RMB 700 stents anymore and replace them with more expensive ones. In the end, the patients still spend the same amount of money on a s…
Labor income is getting lower and lower, while capital income is getting higher and higher. I have been working for six years and have never asked my parents for money. Now I use my own savings to invest. My annual capital income is almost equal to my labor income, and I haven’t bought a house yet [smile]
Today I watched an interview with He Jinhua. She said that we are at the critical point of civilization. I agree very much. We are thinking about new civilization with the old civilization's thinking. During the 2022 Beijing Winter Olympics, Beijing's official use of driverless taxis will be a milestone event. From now on, production will be completely unmanned, and even machine maintenance will …
don't know which other industries will be involuted, but it is obvious that low-educated workers around 40 years old have a hard life. Various mechanizations have replaced ordinary labor, causing these people who have elderly parents and young children to suffer. Will there really be a place for them in another ten years? And many of them have no social security.
I hope that society, especially enterprises and education departments, will pay more attention to specialization and professionalism. Now many enterprises like to recruit so-called multi-talented people, which takes up a lot of jobs and may reduce work efficiency. I think those professional people should be given corresponding professional positions, otherwise the majors applied for in college wi…
Do you know what the worst thing about this era is? No, no, no, it’s not the rampant materialism, the emergence of subcultures, or even the class division and social division! The worst thing is that this damn world brings all the beauty to you and opens the lid. This damn dream deceives everyone, as if suddenly everyone has more choices, so people can easily end a relationship, change a job, or …
I have never experienced a social economic recession (not referring to the economic recession of an individual family). I am still studying for a master's degree and I am afraid that I will encounter a social and economic recession when I start working or when I am in my prime [pout].
Alas, the work is exhausting and the income is low. In fact, the more you pursue the quality of life, the harder it is. If you don’t pursue it, you will feel that your life is wasted.
Jingjing has been exiled. When will our new supervisor return to her loyal workshop? [doge]
Involution - My personal understanding is that the competition pressure at the same level is high. A large number of domestic labor forces at the same level correspond to a small number of domestic industrial positions that match the capabilities of the labor force at that level, resulting in fierce competition. In order to highlight their advantages, the labor force at the upper level migrates a…
Development has not kept up with expectations. The cost of living has risen faster than wages. The housing prices in Urumqi, a third-tier city, are comparable to those in second-tier cities. I went to school in Changzhou. After graduation, I wanted to go home to work and be closer to my family. But when I came back, I found that the prices during the holidays were much higher than in Changzhou [e…
Work hard in N-tier cities to settle down in N+1-tier cities
Another industrial revolution, there will be fewer jobs and more robots will replace them.
No, I think people don’t have expectations for growth. There were even expectations of slowing growth or even decline two or three years ago, but commodity and housing prices are still rising, and companies are still seeking growth. Companies are competing with each other. Homogeneous competition is the life of most people in China from childhood to adulthood, and the same is true between compani…
There aren't that many jobs. There are too many college students. Send me to Africa.
To alleviate the internal circulation, society needs more jobs. As long as the demand is always greater than the supply, there will be no internal circulation.
Currently doing testing, the work is mainly divided according to the project. 1-I told others that it is useless to work faster, because you will never feel relaxed because of the fast progress, but will only torment yourself. 2-Don't think about improving efficiency for the company. Improving efficiency means higher utilization. You can secretly improve work efficiency, but you cannot shorten th…
When looking for a job, do you find that the employment opportunities are limited? There are few jobs that match your major, and there are only a few types of jobs...
Tencent employees’ welfare is earned by selling skins from Honor of Kings. Until now, his game client often freezes and he can’t even do his job well. How can he have the possibility of promotion?
<p>Is it really easy to get private enterprises to assume social responsibilities... I have worked in government public relations in different countries, and have also had various forms of cooperation with domestic central enterprises and state-owned enterprises. In fact, governments of various countries will require private enterprises to assume part of the social responsibilities while obtainin…
<p>Foxconn has all kinds of problems, but why is Foxconn still popular in Zhengzhou? Why do workers still line up to apply for jobs? We are not fools. If there are better opportunities, will we still go to Foxconn? Foxconn provides better jobs for workers in Zhengzhou and provides more tax revenue to the Zhengzhou Municipal Government than before. This is the contribution Foxconn has made to the …
Why are they unwilling to go? Because the environment is bad, the overtime hours are long and the workers have no dignity. Even if there is a factory that gives 30 minutes of tea break in the afternoon, works eight hours a day, and the monthly salary is not less than 6,000, it will be easy to recruit people!
You have to look at the hourly wage, the intensity of labor and the working environment. People strive for higher positions, and they are not all fools.
In fact, working in a factory does not require high technical skills and has a low entry threshold, so the treatment provided (not only salary, but also working environment, etc., which is also related to the production environment of the industry) is definitely worse than other industries such as office workplaces.
Working more than ten hours a day in a poor working environment, welders in our shipyard earn 10,000 to 20,000 yuan a month, and many of them have their eyes drilled by electric welding. Long-term welding work will have an impact on fertility.
What is a high position? In a socialist country, labor is glorious, and having a job is better than having no job. Many young people are unwilling to work in factories even if they can't find a job. Besides, the basic condition for going up is that you must have the qualities to go up, otherwise you can't climb up. Factories also have their promotion channels. If everyone wants to go to the finan…
There are technical bottlenecks. Young people can work overtime and adapt to various business trips. They need money because they have just started working. So they can survive. When they reach a certain age, their technical ability reaches a bottleneck. They cannot survive overtime and business trips as well as young guys. They are destined to be eliminated. Because no matter how big the Interne…
Yes, there are only a handful of good jobs in this world, and only those who can stand at the top of their industry can enjoy them. After all, the social structure is still in a pyramid shape.
In fact, in most industries, as long as you work hard, there will be different degrees of damage to the body. It's just that manual laborers are more damaged when working, but the physical and mental exhaustion of office workers is also very harmful to the body. If you don't know how to adjust, you may even be in a state of depression for a long time. Workers are the same, all under the oppressio…
Today's white-collar workers are really just birds in the forest of steel and concrete. They look glamorous on the surface, but they are often exhausted. Due to the circle and environment they are in, they have to bear high rents, social expenses and a lot of unnecessary consumption (for face, you can imagine). Not all white-collar workers have an annual salary of hundreds of thousands or even hu…
You have overlooked a question. What is the entry threshold for factory work? What is the entry threshold for office white-collar workers? People of the same age have worked in factories for several years after graduating from college. They have not made any money in these years and have to pay for school. Shouldn't their hourly wages as white-collar workers be higher than those of factory worker…
There are always pitfalls when looking for a job. You can't generalize. Many factories of regular enterprises will not overstate the salary, and they are almost always recruiting people. For example, factories under Lens Technology, factories under BYD, etc.
The manufacturing revival in the United States is 3D printing, and Germany's smart manufacturing is Industry 4.0. Is it a luxury to send children to work in factories? I came from a small place, and the factories in my area can't recruit people even if they pay 8,000 to 10,000 yuan a month (the average local salary is only 3,000 to 4,000 yuan). Why? Working more than ten hours a day, high-intensi…
Only when fewer people go to factories to do this kind of work that is very harmful to the body, will factory owners realize that they should incorporate intelligence and introduce highly intelligent talents to help them upgrade the factory equipment to automated production, rather than letting them lie down and hire some people to destroy their bodies to make money.
It is useless for you to tell me this. Young people nowadays are not fools. They all put their health first. If someone works in a factory for a month and then quits, the factory will basically not be able to recruit people once it is advertised. In addition, from my work experience in construction units in recent years, most young people come in to work for 2-3 years. If they cannot be promoted …
<p>In fact, most factories pay 16 yuan an hour, and do not provide food and accommodation, and the work is monotonous and boring</p>
Isn't this the modern version of Dubai? <br>The brewing of Moutai comes from the local water, which is unique, cannot be moved, and cannot be copied, which is equivalent to a monopoly. As long as the Moutai brand does not fall, Moutai will always be a company that can always have income without competition <br>Moutai employees live a happy life, but Moutai only recruits locals. Employees do not n…
1. Moutai's employees and their families correspond to the locals of Dubai. Only people with UAE nationality can enjoy the benefits. Migrant workers do not have Dubai nationality and do not have benefits, but the fact that they choose to work in Dubai shows that Dubai is still better than their hometown. Moutai Distillery also recruits locals as employees. Although Moutai Town is very wealthy, pe…
<p>I think in this era, if a wine-selling enterprise like Moutai wants to go abroad and have sufficient competitiveness in the world, the quality of its own products is of course very important, but more importantly, the rapid development of China's national economy and the progress of cultural propaganda. Let me give you a few examples: For example, Australian and European red wines are sold ver…
<p>Well said. Capital pursues profit, so it hoards money as much as possible on its side, and then there are few channels for money to flow, resulting in similar situations of hoarding and holding back. The way capital hoards money is to raise the cost of living and survival in society, and not circulate the money. Under the double pressure, how can the gap between the rich and the poor not becom…
When I was in Beijing, I heard those bosses say that the current college graduates are neither high-end nor low-end, and no one wants to do this kind of hard work. <br>However, many people working in Maotai Distillery are young people, and many are undergraduates who have passed the exams from other places. Working in the distillery is very hard, it is very hot inside, and you are dirty after wor…
To be honest, Tencent came to our school to recruit people this year. The basic annual salary is more than 300,000 yuan, and the algorithm position is 400,000 yuan. But the HR told us very clearly at the beginning that we should plan our future career path. We all know that you can't stay in these big companies for long. You can earn 2-3 million yuan after working for 7-8 years. If you want to bu…
am from Zunyi City. I want to correct the answerer. Renhuai is a county-level city, not a county town, so as to avoid being criticized. <br><br>First of all, the uniqueness of Moutai, the special water and geographical location, and historical reasons have made Moutai and Renhuai rich. <br><br>Secondly, the difference between Moutai and other private enterprises such as Alibaba and Tencent is obv…
Another point you didn't mention is their holidays. My brother is a koji maker and he has nearly two months of vacation at the end of the year. Summer is indeed a bit tiring, but the working hours are quite short, only a few hours a day, compared to 996. Although the nature of the company cannot be generalized, I think state-owned enterprises are better than private enterprises as a whole.
My girlfriend rents an apartment for 4k. When her salary was low, she earned 6k. She graduated from a double first-class university and has been working in Beijing for 8 years.
I think what the author wants to express is that capitalists should have a sense of social responsibility? At least let the people working there feel a sense of belonging? Now many companies talk about having a sense of belonging, but if you don't give employees anything, who will work for you? Although Shenzhen is rich, the education and medical care are average. Not to mention providing benefit…
quickly wrote it down. I suddenly remembered something my roommate said when he was looking for a job. He said that you have to work hard once you get there. This company is very tiring, but it is tiring as long as you are tired. There are ways to move up. Other companies are not easy to get into. It is meaningless to leave on time every day. I said that it is precisely because you can leave on t…
Yes, that's what you mean. We can work hard. It doesn't matter if I don't have a degree or can sell my physical labor. But at least selling physical labor can make people have enough food and clothing and be decent enough. This is a truly sustainable society.
<p>School district housing is a screening of parents, including IQ, and teachers, and the environment is very important in education. <br>For most ordinary people who make a living by selling surplus value, when faced with the choice of which city to start a family and career, the level they can achieve in this city is far more important than "job opportunities" and "internationalization" and oth…
There is also an airport for Moutai and Wuliangye. I have evaluated their new flights. They are really conscientious airports. There are not many flights, but they really provide a lot of jobs.
College students think that they won’t even have winter vacation after they start working [laughing and crying]
Small question, the reason why the winter vacation is so short, in addition to those points, there is another very important point, every time I wake up, it is already 11:30 in the morning, every time I go to bed at night, it is already three in the morning, but to be honest, homework does not exist at all, I used to look forward to waiting for me to enter the university, I will take various cert…
After I start working, I just want to go back to school. When I do the same job every day, I feel like I will have to do this job for the rest of my life. There is no hope. I go to bed at two o'clock. This is probably how life is.
don't know if I can pass the postgraduate entrance examination, but after a week of group meetings and presentations during the holiday, I suddenly lost interest in studying. When I encounter difficulties at work, I can comfort myself by insisting on getting paid, and at least I can get positive feedback once a month. When I am in the dark about scientific research, I really can't find anything r…
I want to find a job with two days off a week, but unfortunately I suspect that HR is like a hibernating animal that will only wake up after the Waking of Insects [speechless][speechless]
After working, I still miss college the most. It was really the happiest and most carefree time in my life [laughing and crying]
My boss always thinks that I should be on standby after get off work, reply to WeChat messages at any time, and continue unfinished work on the weekend. Will I lose my job if I don't do it?
College student, has homework (make up for it at the beginning of the semester), a little social pressure (dormitory relationships are good, but have to face teachers, and have some work), too many classes (basically full), can't pass the test and can't lie flat, emo anxiety lover, the future is promising (send) [藏狐][藏狐]
Let me briefly mention college clubs [covering my face] After being in a club for more than two years, I feel that it is better not to join clubs. If you are preparing for the postgraduate entrance examination and focusing on studying well, clubs will really take up your time; if you are preparing to find a job directly after graduating from undergraduate studies, it is better to gain internship …
Vote for the last two sentences! As an overtime worker at work, I suddenly feel cheerful [support][support][support][doge]
The Miracle of the Han River was achieved by working 3,000 hours a year... Koreans are really hardworking
No, as dispatched workers are the main producers of China's material wealth, they work more than 12 hours a day, and the total working hours are about 4,000 hours a year. It is conservatively estimated that there are 400 million people working in this way, while China's working-age population is only 980 million.
Even now, China can still reach 3,000 hours of work, and the electronics factory has a 12-hour day off.
There are tens of millions of people working in the construction industry, many of whom work 007, some of whom work more than 4,000 hours a year.
I will help you calculate the average working hours of an assembly line worker in a piecework system in a year. From 8 am to 8 pm, deduct 1 hour for lunch and dinner, and a month is 26 days (in fact, workers often do not have a week off, and more people work from 7 am to 10 pm). 11*26*12=3432, deducting statutory holidays, it is 3300.
That's only 8 hours of work per day.
Park Chung-hee was a ruthless man. At that time, Koreans worked more than ten hours a day, and many people died of exhaustion every year. If anyone was caught hoarding gold and foreign exchange, he would be shot.
<p>Most of the workers in our countryside work about 16 hours a day</p>
It is difficult to distinguish between the work and life time of self-employed people.
I work 965, with occasional overtime, and my normal working hours are more than 2,100 hours a year, but the average working hours are only 2,200 to 2,300? Am I just ignorant, and the labor law has been implemented now?
<p>52*5*7 is 1820, right? You can't be working from 9am to 6pm, right? Don't you usually take a two-hour break at noon? This is not considered working time</p>
<p>In the past, parents worked 8 hours a day, 6 days a week, with only one day off (this is the standard for state-owned enterprises, but not necessarily for private enterprises). The annual working hours are estimated to be close to 300 days, at least 2,400 hours. If it is a private enterprise or a township enterprise, 3,000 hours is very likely. Therefore, the economic miracle of China's privat…
Based on my current working hours, it is definitely over 3,000 hours. I took two days off in the last six months, so I am planning to run away [laughing]
<p>.........It is true that dispatched workers do work long hours, but there are often times when they cannot wait for work. There are 365 days in a year, and they work less than 200 days in total... Even if they work 12 hours each time, it is 2,400 hours in total... And this is 12 hours each time... In fact, there are very few who can work 200 days in a year, and most of the time, they only work…
<p>Three thousand is nonsense. Dispatched workers are lucky to get 1500 a year. It's not that they don't want to work 3000, but they can't find stable work. </p><p>People who can find stable work channels can generally work 2000+ hours a year. Some very hardworking young people who work two or three jobs can make 3000. Others generally work around 1000 hours. On average, they can't make 2000, and…
Dispatched workers in factories work 13 hours a day, six days a week, 312 hours a month, and 3,000 a year. What do you mean by cleaning ladies who finish their work at your house and don't go to other houses? Besides, they are not considered industrial workers. They are rated 1,500 a year on average, and the average Chinese are rated 2,200 hours a year. There are so many people who don't work. Do…
This is a bit far-fetched. Construction workers work very hard, but their working hours are not long. If you work 4,000 hours here, you have to work 11 hours a day without a break all year round. Moreover, construction sites in cities cannot be operated at night. How is this possible?
Assembly line workers work long hours, and those who insist that construction workers work long hours are just pretending to know. Moreover, it is very difficult for companies that work two shifts to recruit workers, and most people cannot stand the intensity of the work, so three shifts are more common. Of course, many industrial companies also stop working at night, so the intensity of the work…
The construction industry not only has workers, but also grassroots management, the eight major personnel, and the 007 work system refers to grassroots management. In addition, the working hours of the construction site workers are also very long. Normally, they are willing to work overtime for eight hours. For pouring concrete, they can add one or two hours for a short time, and 6-7 hours for a …
<p>China might as well make more concessions. Working 24 days a month, 10 hours a day, 11.5 months a year, that's 2760 hours. This doesn't include hidden overtime.</p>
Especially since the whole family of Parasite has a job at the president's house, it is not a problem to change to a clean living environment.
Some people really can't do it. They always say that working in Japan is hard. In fact, many Shanghainese in Japan say that working is easy and they don't want to go back to Shanghai.
<p>If the standard is that the upper middle class of society can become a superior person and start a business, then there are indeed more opportunities in China. But what does this standard have to do with ordinary people? If the question is whether a person from a lower-middle family can enter a large company and earn an above-average salary, then Japan has much greater opportunities in this re…
would like to know how this average time is calculated. For example, in a Japanese family, the man works 16 hours a day, and the woman is a housewife, with no working hours on the surface, so the average time is also 8 hours. <br> In addition, married women with children in my company (a Japanese company) have to pick up their children from school and get off work at 3 or 4 in the afternoon (hour…
1640, based on a five-day week, that is less than seven hours of work per day?
There are about 240 working days in Japan per year, plus summer vacation and at least 20 days of paid vacation, so the actual number of working days per month is about 18 days.
I calculated it based on 2,500 hours, which is about 9.4 hours of work per day, with two days off. Do you believe it?
looked at the link you gave me. In 2017, China worked 2,174 hours, Japan worked 1,738 hours, and South Korea worked 2,11 hours. I don't believe China's data. I tell you that 996 means starting work at 9 am and leaving get off work at 9 pm, working six days a week, with a lunch break of at most one hour, which is 66 hours a week. I don't know how you calculated 42 hours.
<p>Don't bring up 007. Have you ever seen a person working for 7 consecutive days without sleeping? Working on a construction site is hard, but what the hell is 007?</p>
<p>What is the difference between 007's statement and the fan circle's "My idol works 25 hours a day"? </p>
Workers usually work eight hours a day, and if they are provided with accommodation, they work about ten hours a day. If they are rushing to meet deadlines, they work more than 12 hours a day. Lower-level managers, such as the eight major staff, basically work 12 hours a day. If they are rushing to meet deadlines, they may work 24 hours a day. If they are sick, they will work all night, sleep in …
That's because you've never worked on a construction site. You don't know how powerful 007 is. There are no weekends, and you have to be on call 24 hours a day. Because the migrant workers work in two or three shifts, your work rhythm must be consistent with that of the migrant workers. But they can work in shifts, but you can't. You can get calls at any time when you're lying in bed. Note that i…
<p>When my dad was a construction worker, he went to the Northeast, thousands of kilometers away. He left after the 15th day of the first lunar month and came back in the twelfth lunar month. But at that time, he could get a salary of 20,000 yuan when he returned to the construction station at the end of the year (in 1994), while my mom only earned 120 yuan a month in the local rice and flour fac…
<p>Continuing from the previous point, my dad was willing to work so hard because he was paid 10 times more than the local workers. You also work so hard, have you ever thought about what you are trying to gain? If it is not worth it (I think you think it is not worth it, otherwise you would not come to complain), why not jump out while you are still young. In addition, when my dad was in Northea…
<p>… Whatever you say, I don’t think your description is very intellectual.</p><p>Long-term physical labor won’t be that tiring. You can feel what it feels like to do advanced math problems from the moment you open your eyes until you close your eyes and go to sleep.</p>
<p>Working hours at construction sites are more solid than 996! </p>
<p>I saw in the news before that due to the declining birthrate, Japan is recruiting interns from the Philippines, Indonesia, China and other regions to meet the needs of high-intensity jobs such as farming and 24-hour convenience stores. The intensity of these jobs is no less than 996, and the number is increasing year by year. Will these people not be counted in Japan's working hours? After all…
I just checked and found that there are more than 1.6 million interns in 2019. If you want to experience working and living in Japan, I suggest that if you can't come up with a conclusion here, you can experience it yourself. Then come to Bhu and answer the questions as a person who has experienced it firsthand.
Convenience stores are okay, especially late-night ones. The hourly wage is generally 1150. When there are not many customers, you just need to organize the shelves. There is no need to worry about safety... Also, compared with the 996 work schedule at internet companies, the work intensity at convenience stores is not that high... They just heat up meals for people, pay the bills, and they don't…
There is no way around it. The income gap between developed and developing countries is too big. Japan's skill training system, which is clearly a slavery system, is seen as a good job opportunity by the lower classes in developing countries. Japan does not have white leftists to speak for these lower-class foreigners. With the approval of the people, companies and the government are doing their …
Is this true? I don't have data, but I think life in Japan is very depressing and the working hours are not short.
<p>I work in Tokyo. Although it is more depressing than Europe and America due to social and cultural factors, it is still nothing compared to 996. </p>
It's all about mentality. If you work with a fat otaku mentality, you will be fearless. But it's hard for the local residents to do that after being influenced by their whole life.
I haven't worked in Japan, but the difference between the life of a language teacher and 996 is that the treatment is indeed better than in China.
Who are language teachers? We are generally talking about full-time employees working in medium-sized or large-scale companies or listed companies.
In Tokyo, a couple both work in convenience stores. If they want to buy a 100-square-meter house within a ten-minute walk from a subway station in downtown Tokyo, they have to work for eight years without eating or drinking! ! !
<p>Let me do the math for you. A normal person with no education or skills can earn at least 1,013 yen per hour in a convenience store in Tokyo. Working 8 hours a day and 5 days a week means at least 160,000 yen (equivalent to more than 10,000 RMB) per month. According to my own experience and that of people around me, international students from ordinary families can live comfortably in Tokyo wi…
<p>To be honest, it is not unusual for low-level employees in Beijing to earn 3,000 yuan. They cannot afford to rent a house. They have to save money on food, and that is if they work more than 60 hours a week. If you work in a convenience store under normal circumstances and have to work two days off a week and not be tired or work overtime on holidays, you can only live in a basement with one p…
<p>In fact, they do less work because they have transferred relatively heavy and low-end jobs to countries like China. </p>
<p>I just want to complain that I live in Gimhae, a city next to Busan with a population of 500,000. A house of about 70 square meters is about 130 million. An ordinary person can buy a house in six or seven years by working hard, eating less takeout and buying less clothes. There is no pressure in life at all. I think there is almost no gap between the rich and the poor because the salary of mos…
Women's high education levels and higher work incomes will also reduce their desire to get married and have children, especially in regions such as Japan and South Korea where women are responsible for all housework.
That's because Korea has a very high undergraduate education rate, coupled with academic achievement worship and compulsory military service. When people are released, they are at least 25 years old. If they start studying for a master's degree or a job, they are already 30 years old. By the time they settle down, they are almost past childbearing age [covering face]
Japan's female employment rate is higher than South Korea's
<p>Is it reasonable to judge whether there is involution based on working hours? </p>
<p>Even if we strictly implement a two-day weekend and 8-hour workday, there are still about 2,000 working hours a year</p>
<p>So it is obvious that informal employment and part-time work are also included in the statistics. </p><p>The decrease in working hours is certainly due to the reduction in overtime for full-time employees, but the bigger reason is the increase in the proportion of part-time workers. <a href="http://link.zhihu.com/?target=https%3A//www.keidanren.or.jp/journal/times/2020/0917_12.html" class=" wr…
<p>Where can I find the average working hours? Is there any data for China?</p>
So are the hours of work going up or down?
We can't generalize about Americans. The working hours of white people and other races are different. White people probably can't do the dirty and tiring work.
My senior sister received a full scholarship for joint training in the United States two years ago. She earns 2,800 a month at Mayo Clinic in Minnesota. She gets 600 for accommodation and 300 for food if it's cheap. The rest of the money is her own. She is a very tight Liaoning girl. Everyone has their own way of living. Anyway, in Minnesota, 1,000 dollars can solve the most basic food and accomm…
$80,000 is fine in a rural area in the Midwest, but not so good in the Bay Area. The US economy has also been in recession in the past two years. My feeling is that prices have skyrocketed, the stock market has plummeted, jobs are not as easy to find as before, and money is not easy to make. It’s useless to explain to him that involution is useless. I guess he will understand it immediately. The …
Although their annual salary is higher than ours, they work shorter hours [for heart]
My senior sister received a full scholarship for joint training in the United States two years ago. She earns 2,800 a month at Mayo Clinic in Minnesota. She gets 600 for accommodation and 300 for food if it's cheap. The rest of the money is her own. She is a very tight Liaoning girl. Everyone has their own way of living. Anyway, in Minnesota, 1,000 dollars can solve the most basic food and accomm…
$80,000 is fine in a rural area in the Midwest, but not so good in the Bay Area. The US economy has also been in recession in the past two years. My feeling is that prices have skyrocketed, the stock market has plummeted, jobs are not as easy to find as before, and money is not easy to make. It’s useless to explain to him that involution is useless. I guess he will understand it immediately. The …
Although their annual salary is higher than ours, they work shorter hours [for heart]
The most important sentence here is that this guy said he likes his job. So how much do we who watch this video like our jobs? [Thinking]
In Chinese cities, housing may take up half of your income, and then there is food, clothing and transportation. Most Chinese people's lives are basically tied to housing and work, with few real time for themselves, working hard for their bosses to drive Ferraris and planes.
The essence of involution is vicious competition, competition that destroys the market environment. For example, two people with the same education and ability compete for a job. They could have gotten 13k, but one of them is willing to lower his cost and only take 10k to improve his competitiveness, or increase his working hours to meet the company's needs. However, this will lead to the applica…
Don't be envious, there is gain and loss. Although our salary is low, we work long hours.
We all studied environment. My senior went to a 985 university for further studies through unremitting efforts. After graduating with a doctorate, he now buys cars at a 4S store. Last year, I went back to my hometown and couldn't find a job [grin]. Actually, there was one, with a monthly salary of 5,500 yuan, but I only got a little over 4,000 yuan, which I didn't look down on.
The writing is not very good, so please just take a look. I personally feel that working in China is very tiring and competitive. In order to achieve the so-called employment rate, our school sends all graduates, no matter what major you are, to hotels for internships or to factories. I don't understand what the purpose of life is. You work for others all your life, get married, buy a house, have…
Before I resigned, I worked in a power plant under a Fortune 500 company. I worked six days a week and nearly twelve hours a day. My monthly salary was 3,300 yuan in the first half of the year, and it was around 4,300 yuan after half a year. I basically had one less day off during holidays, which meant I had two days off a week during holidays. Although I got triple the salary, of course I had to…
You should know that a Lamborghini is only 500,000-800,000 dollars in the United States. You can buy it after working for a few years. In China, you can only see it for a lifetime.
Whether I go back or not depends on my parents. If they are both in China, then I will go back. If they want to go abroad, then the possibility of not going back is much greater. I belong to the former category. After all, no matter how good the job outside is or how much money you make, it is not as practical as accompanying your parents. After finishing college, my parents will be old.
I feel that some of the information in the comments section is a bit outdated. 80,000 is quite high for Americans. After all, the average annual household income was 64,000 US dollars the last time I checked, which is the average for single and multi-person households. 80,000 is already higher than this number. However, it is still relatively low for most Chinese students who can stay in the Unit…
First of all, an annual salary of $80,000 is considered small middle class in most states even before tax, at least life is worry-free. Secondly, he is only 24 years old and doing technical work such as oil field pollution prevention and treatment, and he will be more valuable as he gets older. Just ask how much an intern doctor or trainee lawyer can earn. At this age, it is really good.
I worked as a security guard in 2008, with a salary of 1.3k. In 2009, I was a screwdriver, with a salary of 4-5k for a laborer and 6-8k for a technician. In 2012, I was unwilling to be ordinary and went into sales, with a salary of 1.2k at first, but later, the pressure increased and the salary increased to 6-12k. I like research by nature, so I switched to technical sales in 2015. I invested a l…
My friend works in an electronics factory during the summer vacation, earning 2500 a month, and has to work 11 hours a day...
I love the work I do and I feel like I’m important.
The salary in the United States is really high. I only make 350,000 yuan a year in China. Fortunately, the work is easy and I have a lot of free time.
I have an open attitude, there is nothing to complain about, I just think life is much better now than before, this achievement is really amazing anyway, I have worked for more than ten years and never encountered anything more than eight hours, one day off or anything like that, maybe I am lucky, I earn money through labor
In our university, students can work part-time for $15 an hour. Although international students cannot work more than 20 hours a week, it is enough to subsidize living expenses. . . . My friend just graduated from college this year and went out for an internship. He got $3,000 a month, including medical and dental insurance. After he becomes a regular employee, his salary will be higher. A data s…
I can only say that most of the people who are trying to get promoted are those who have never worked or are from wealthy families [wonderful]. Workers should know how difficult this year is.
I think it can be defined like this: Due to the oversupply of labor, workers have to reduce wages and increase working hours to get jobs.
The wages of every game in the United States are different. There is a minimum standard. No matter what job you do, it cannot be lower than that number. I have an American friend on Steam. I usually play PUBG and CSGO with him. He told me that his salary is 15 US dollars an hour. I am so scared.
Lowering one's own value in exchange for job opportunities
It's very simple. You tell him that there is a job in China that pays 20 yuan per hour. Since there are so many people in China, many people want this job. So someone automatically lowers the salary to 15 yuan, which is the lowest price that everyone can accept. Originally, a group of junior high school dropouts were competing for this job. Then a college student came and said that he was also wi…
Zuo Gun's imagination can only make such a leap at this level. Let's not talk about medical care, after all, there is private medical insurance to cover the cost. Let's talk about student loans. Obama paid it off for 21 years, including many years as a teacher. He also worked in a law firm while studying. The salary of a teacher is still quite valuable. In addition, even if it is not Harvard, som…
We get paid less but we work longer hours [grin]
Eighty thousand dollars is not a high salary, but the work in this oil company is really easy. Apart from other things, I met a guy named xom for two days during my internship. He was often nowhere to be found at three or four in the afternoon.
[doge] I work for an oil company. I make less than $30,000 a year, and I do the hardest and most exhausting oil job.
It's quite touching that he feels that he likes his job very much.
Other people's independence means that even if you have no house, no car and no stable job, they will still marry you if they like you.
What is involution? I can do your job and maybe even better than you, but I only want 70,000 yuan a year [doge]
The real problem of internal competition is the ineffective competition for repetitive work. Normal internal competition leads to more and more college students and postgraduates, which is actually a good thing. The problem lies in how to get these people jobs that match their level. To put it bluntly, it is still the current strategy of internal circulation and industrial upgrading. This thing c…
Do American companies want me to work? [doge]
If you earn 800-900 a month in the US, you can't survive [laughing and crying] According to the book "Sweeping the House", the rent is more than 600. I saw a video before saying that the US minimum living allowance is 1000, but it is difficult to find a job without a fixed residence when the rent is 800-900 (I don't know why). In many videos, the average monthly income in the US is 3000 US dollar…
At that time, I just didn't want to roll up my sleeves and went back to my hometown. I got married and started working right after graduation. If I stayed in a big city, I felt hopeless during my internship.
After graduating from college, I started out as an environmental scientist. So I can also say that I am a computer scientist instead of a software engineer [funny]
Tell them that if they only made $8,000 a year for the same job, maybe they would understand.
I can only make 3500 a month at best, and I don't have a good job. Can I go to the United States and wander around?
I am more surprised that this person's job is to deal with oil companies and solve oil pollution problems in order to protect the environment [eye-catching]. I am relatively ignorant and don't know whether our oil companies are doing this.
He was able to find a job after graduation, but I was unemployed after graduation and could only struggle to pass the civil service exam and postgraduate entrance exam.
Involution means that I am just like you or even more capable than you. I tell my boss that I can do your job or even more for only $40,000, and from then on, the boss’s recruitment criteria change from “your salary” to “my salary”.
work about 10 hours a day now, earning 20 yuan an hour, and eat one meal a day, or get up in the middle of the night to eat the second meal. I pay the rent for the company, 6 people in a room, but I feel it's not bad, because many people I met work more than 10 hours a day under the scorching sun, and only earn more than 200 yuan a day.
If there are few people, there will be no competition. If it is not easy to recruit people, the boss will treat employees as human beings. All work will be rationalized and will not be used for entertainment.
Let's just use the exchange rate to calculate regardless of the overall environment. My friend graduated from a second-tier city with an environmental engineering degree and earned 10k a month in a factory. He was idle every day, and his job was the same as this American guy. In the United States, he earned and spent dollars. A meal there cost more than 10 or 20 dollars. Why didn't you tell him t…
Shh, this isn't a high-paying job, isn't this a tiankeng environment? [doge]
80,000 yuan is not a lot in the United States, but it is OK. You can easily buy a big house and car, and go out for fun. If your wife also has a job, then life will be very comfortable. It's not that this industry makes a lot of money in the United States, but that people in the worst professions in the United States make that much. In the United States, the better professions, optometrists who f…
The empathy of the review and promotion staff of Station B has risen. They go directly to the homepage [shy][like][call]
Foreign scientists are definitely paid more. If you compare foreign scientists with ordinary people in China, the work they do is different.
Why do you want to take the firefighting certificate? Because I want to be a lawyer. Is there any connection between the two? If I have one more certificate, I will have a better chance of getting a successful interview, so I will also take the CPA, legal practitioner qualification, teacher qualification, etc. exams in the future. This is the internal competition I have witnessed with my own eyes…
There is nothing much to say, everyone must work diligently.
More than 70% of workers in first-tier cities earn less than 70,000 RMB per year, or just over 10,000 USD.
Doctors in the US seem to really make money? Doctor Strange started out as a surgeon, right? He was the top specialist in a big hospital. How can a doctor like him drive a sports car and have a cabinet full of luxury watches? Or is this just a portrayal in the movie?
was in line with a guy from California before. He also made a few thousand dollars a month, which was not enough for his expenses. He also spent too much and could not save any money. During the epidemic, his house was taken away and his job was squeezed out.
I have worked in the civil engineering industry for two years, but I can't even make 80,000 yuan before tax. Half of it is spent on rent and food.
Let's discuss this issue after working outside for a few years. It is possible that some people have easy jobs and high salaries, but most people still work terribly.
How to explain? It's very simple. Just say that someone else can do the same job as you for $50,000.
24 years old, $80,000 a year, what's there to discuss? I just graduated and found a job and I think I can do it for $4,000.
In terms of environmental protection, there is still a lot of work to be done, but there are not many job vacancies.
What's the good explanation? Ask him to resign and come to work in China
The key point is not how much money you make, if you have the ability, you deserve more money. The key is the working hours. In fact, no matter how much money you make, the working hours are too long, and some large companies are even more competitive. If you make money but have no time to spend it, no time to play, and are sick, you will feel that life is meaningless.
The nature of the 80,000 middle-class jobs is the same as that of the 80,000 in China
"What's wrong with you waiting for the subway longer on your way to work every day? You can use the time waiting to memorize some words or read the news to enrich yourself."<br>You can say this, probably because you are not very experienced and idealize life or it is simply because you are talking nonsense. <br>If you come home late at night exhausted in addition to the 996 work schedule, but fin…
The key is that getting a bachelor's degree is not the end! <br>Getting into a bachelor's degree is just the first step, then what? Do you want a scholarship? Do you want a guaranteed place in graduate school? The competition for graduate school and civil service exams is even more intense! No one will favor you anymore. <br>Especially when you enter the working world, your boss doesn't care wher…
Therefore, managers should not forget their original intentions and keep their mission in mind, and understand that the purpose of their management is to seek happiness for the people... If the people do not go to the Northwest, then managers should go there, and manage in the vast and free frontiers and rural areas... Lead and guide the people to carry out socialist construction... Move the capi…
First of all, thank you for implicitly agreeing with my point of view. Secondly, with the same college entrance examination scores, candidates from Beijing can get into the bottom 985 universities, while candidates from other places can only get into non-985 universities. After graduating from undergraduate school, the bottom 985 universities can be admitted to the worst universities in their own…
don't understand. You can't get into graduate school if you're at the bottom of the class. And then, if you don't work together, you'll be surrounded by real werewolves. Doesn't that highlight your incompetence? <br>Don't even mention non-top universities. My classmates are in vocational colleges. So what? You make 5,000 yuan with your undergraduate degree, 6,000 yuan as a food delivery guy, and …
Then why don’t you think about why everyone is flocking to first-tier cities? Think about whether medical care, education, business, and work resources are all in first-tier cities?
Regional development is uneven, and some jobs are hard to find outside the front line
[truncated: 1,188 more rows]
